# Supplementary material for: Hydroclimate variability in Scandinavia over the last millennium – insights from a climate model–proxy data comparison
Source: Copernicus journal article supplement (doi:10.5194/cp-13-1831-2017), 2017-12-18
Supplement: Supplementary file 1 [file RCSsigFree_TRWcrns.xlsx]

## Sheet: Blad1
	E Finland	Gotland	Jondalen	Baljasen	Bjorbo	Ekhultebergen	Farhagsberget	Helvetets hala	Halle-Vagnaren	Hornslandet	Korphalorna	Myrkarby	Namndo	Valekleven-Ombo	Putbergen	Salboknos	Saro	Sisshammar	Skarmarbodabergen	Skitasen	Skuleskogen	Sorknatten	Tjurhults mosse	Tjusthult	Tyresta
	61.87	57.49	59.71	59.04	60.27	58.08	57.14	57.17	59.01	61.43	57.45	59.52	59.11	58.37	59.11	59.46	57.51	59.09	59.26	59.22	63.06	58.55	59.52	57.27	59.11
	28.9	18.41	9.53	12.27	14.44	16.14	16.14	15.17	11.08	17	15.23	16.56	18.41	14.32	16.55	14.54	11.93	18.02	15.07	15.29	18.29	12.27	14.71	15.2	18.16
594	1.53	NaN	NaN	NaN	NaN	NaN	NaN	NaN	NaN	NaN	NaN	NaN	NaN	NaN	NaN	NaN	NaN	NaN	NaN	NaN	NaN	NaN	NaN	NaN	NaN
595	1.368	NaN	NaN	NaN	NaN	NaN	NaN	NaN	NaN	NaN	NaN	NaN	NaN	NaN	NaN	NaN	NaN	NaN	NaN	NaN	NaN	NaN	NaN	NaN	NaN
596	1.103	NaN	NaN	NaN	NaN	NaN	NaN	NaN	NaN	NaN	NaN	NaN	NaN	NaN	NaN	NaN	NaN	NaN	NaN	NaN	NaN	NaN	NaN	NaN	NaN
597	0.996	NaN	NaN	NaN	NaN	NaN	NaN	NaN	NaN	NaN	NaN	NaN	NaN	NaN	NaN	NaN	NaN	NaN	NaN	NaN	NaN	NaN	NaN	NaN	NaN
598	1.082	NaN	NaN	NaN	NaN	NaN	NaN	NaN	NaN	NaN	NaN	NaN	NaN	NaN	NaN	NaN	NaN	NaN	NaN	NaN	NaN	NaN	NaN	NaN	NaN
599	1.179	NaN	NaN	NaN	NaN	NaN	NaN	NaN	NaN	NaN	NaN	NaN	NaN	NaN	NaN	NaN	NaN	NaN	NaN	NaN	NaN	NaN	NaN	NaN	NaN
600	1.363	NaN	NaN	NaN	NaN	NaN	NaN	NaN	NaN	NaN	NaN	NaN	NaN	NaN	NaN	NaN	NaN	NaN	NaN	NaN	NaN	NaN	NaN	NaN	NaN
601	1.37	NaN	NaN	NaN	NaN	NaN	NaN	NaN	NaN	NaN	NaN	NaN	NaN	NaN	NaN	NaN	NaN	NaN	NaN	NaN	NaN	NaN	NaN	NaN	NaN
602	1.332	NaN	NaN	NaN	NaN	NaN	NaN	NaN	NaN	NaN	NaN	NaN	NaN	NaN	NaN	NaN	NaN	NaN	NaN	NaN	NaN	NaN	NaN	NaN	NaN
603	1.278	NaN	NaN	NaN	NaN	NaN	NaN	NaN	NaN	NaN	NaN	NaN	NaN	NaN	NaN	NaN	NaN	NaN	NaN	NaN	NaN	NaN	NaN	NaN	NaN
604	1.504	NaN	NaN	NaN	NaN	NaN	NaN	NaN	NaN	NaN	NaN	NaN	NaN	NaN	NaN	NaN	NaN	NaN	NaN	NaN	NaN	NaN	NaN	NaN	NaN
605	1.391	NaN	NaN	NaN	NaN	NaN	NaN	NaN	NaN	NaN	NaN	NaN	NaN	NaN	NaN	NaN	NaN	NaN	NaN	NaN	NaN	NaN	NaN	NaN	NaN
606	1.361	NaN	NaN	NaN	NaN	NaN	NaN	NaN	NaN	NaN	NaN	NaN	NaN	NaN	NaN	NaN	NaN	NaN	NaN	NaN	NaN	NaN	NaN	NaN	NaN
607	1.328	NaN	NaN	NaN	NaN	NaN	NaN	NaN	NaN	NaN	NaN	NaN	NaN	NaN	NaN	NaN	NaN	NaN	NaN	NaN	NaN	NaN	NaN	NaN	NaN
608	1.214	NaN	NaN	NaN	NaN	NaN	NaN	NaN	NaN	NaN	NaN	NaN	NaN	NaN	NaN	NaN	NaN	NaN	NaN	NaN	NaN	NaN	NaN	NaN	NaN
609	1.075	NaN	NaN	NaN	NaN	NaN	NaN	NaN	NaN	NaN	NaN	NaN	NaN	NaN	NaN	NaN	NaN	NaN	NaN	NaN	NaN	NaN	NaN	NaN	NaN
610	1.023	NaN	NaN	NaN	NaN	NaN	NaN	NaN	NaN	NaN	NaN	NaN	NaN	NaN	NaN	NaN	NaN	NaN	NaN	NaN	NaN	NaN	NaN	NaN	NaN
611	0.969	NaN	NaN	NaN	NaN	NaN	NaN	NaN	NaN	NaN	NaN	NaN	NaN	NaN	NaN	NaN	NaN	NaN	NaN	NaN	NaN	NaN	NaN	NaN	NaN
612	0.81	NaN	NaN	NaN	NaN	NaN	NaN	NaN	NaN	NaN	NaN	NaN	NaN	NaN	NaN	NaN	NaN	NaN	NaN	NaN	NaN	NaN	NaN	NaN	NaN
613	0.975	NaN	NaN	NaN	NaN	NaN	NaN	NaN	NaN	NaN	NaN	NaN	NaN	NaN	NaN	NaN	NaN	NaN	NaN	NaN	NaN	NaN	NaN	NaN	NaN
614	0.958	NaN	NaN	NaN	NaN	NaN	NaN	NaN	NaN	NaN	NaN	NaN	NaN	NaN	NaN	NaN	NaN	NaN	NaN	NaN	NaN	NaN	NaN	NaN	NaN
615	0.744	NaN	NaN	NaN	NaN	NaN	NaN	NaN	NaN	NaN	NaN	NaN	NaN	NaN	NaN	NaN	NaN	NaN	NaN	NaN	NaN	NaN	NaN	NaN	NaN
616	1.127	NaN	NaN	NaN	NaN	NaN	NaN	NaN	NaN	NaN	NaN	NaN	NaN	NaN	NaN	NaN	NaN	NaN	NaN	NaN	NaN	NaN	NaN	NaN	NaN
617	1.078	NaN	NaN	NaN	NaN	NaN	NaN	NaN	NaN	NaN	NaN	NaN	NaN	NaN	NaN	NaN	NaN	NaN	NaN	NaN	NaN	NaN	NaN	NaN	NaN
618	0.845	NaN	NaN	NaN	NaN	NaN	NaN	NaN	NaN	NaN	NaN	NaN	NaN	NaN	NaN	NaN	NaN	NaN	NaN	NaN	NaN	NaN	NaN	NaN	NaN
619	0.751	NaN	NaN	NaN	NaN	NaN	NaN	NaN	NaN	NaN	NaN	NaN	NaN	NaN	NaN	NaN	NaN	NaN	NaN	NaN	NaN	NaN	NaN	NaN	NaN
620	0.866	NaN	NaN	NaN	NaN	NaN	NaN	NaN	NaN	NaN	NaN	NaN	NaN	NaN	NaN	NaN	NaN	NaN	NaN	NaN	NaN	NaN	NaN	NaN	NaN
621	0.974	NaN	NaN	NaN	NaN	NaN	NaN	NaN	NaN	NaN	NaN	NaN	NaN	NaN	NaN	NaN	NaN	NaN	NaN	NaN	NaN	NaN	NaN	NaN	NaN
622	0.909	NaN	NaN	NaN	NaN	NaN	NaN	NaN	NaN	NaN	NaN	NaN	NaN	NaN	NaN	NaN	NaN	NaN	NaN	NaN	NaN	NaN	NaN	NaN	NaN
623	0.901	NaN	NaN	NaN	NaN	NaN	NaN	NaN	NaN	NaN	NaN	NaN	NaN	NaN	NaN	NaN	NaN	NaN	NaN	NaN	NaN	NaN	NaN	NaN	NaN
624	0.825	NaN	NaN	NaN	NaN	NaN	NaN	NaN	NaN	NaN	NaN	NaN	NaN	NaN	NaN	NaN	NaN	NaN	NaN	NaN	NaN	NaN	NaN	NaN	NaN
625	0.982	NaN	NaN	NaN	NaN	NaN	NaN	NaN	NaN	NaN	NaN	NaN	NaN	NaN	NaN	NaN	NaN	NaN	NaN	NaN	NaN	NaN	NaN	NaN	NaN
626	0.908	NaN	NaN	NaN	NaN	NaN	NaN	NaN	NaN	NaN	NaN	NaN	NaN	NaN	NaN	NaN	NaN	NaN	NaN	NaN	NaN	NaN	NaN	NaN	NaN
627	0.889	NaN	NaN	NaN	NaN	NaN	NaN	NaN	NaN	NaN	NaN	NaN	NaN	NaN	NaN	NaN	NaN	NaN	NaN	NaN	NaN	NaN	NaN	NaN	NaN
628	0.832	NaN	NaN	NaN	NaN	NaN	NaN	NaN	NaN	NaN	NaN	NaN	NaN	NaN	NaN	NaN	NaN	NaN	NaN	NaN	NaN	NaN	NaN	NaN	NaN
629	0.9	NaN	NaN	NaN	NaN	NaN	NaN	NaN	NaN	NaN	NaN	NaN	NaN	NaN	NaN	NaN	NaN	NaN	NaN	NaN	NaN	NaN	NaN	NaN	NaN
630	0.818	NaN	NaN	NaN	NaN	NaN	NaN	NaN	NaN	NaN	NaN	NaN	NaN	NaN	NaN	NaN	NaN	NaN	NaN	NaN	NaN	NaN	NaN	NaN	NaN
631	0.954	NaN	NaN	NaN	NaN	NaN	NaN	NaN	NaN	NaN	NaN	NaN	NaN	NaN	NaN	NaN	NaN	NaN	NaN	NaN	NaN	NaN	NaN	NaN	NaN
632	0.985	NaN	NaN	NaN	NaN	NaN	NaN	NaN	NaN	NaN	NaN	NaN	NaN	NaN	NaN	NaN	NaN	NaN	NaN	NaN	NaN	NaN	NaN	NaN	NaN
633	0.948	NaN	NaN	NaN	NaN	NaN	NaN	NaN	NaN	NaN	NaN	NaN	NaN	NaN	NaN	NaN	NaN	NaN	NaN	NaN	NaN	NaN	NaN	NaN	NaN
634	1.014	NaN	NaN	NaN	NaN	NaN	NaN	NaN	NaN	NaN	NaN	NaN	NaN	NaN	NaN	NaN	NaN	NaN	NaN	NaN	NaN	NaN	NaN	NaN	NaN
635	0.971	NaN	NaN	NaN	NaN	NaN	NaN	NaN	NaN	NaN	NaN	NaN	NaN	NaN	NaN	NaN	NaN	NaN	NaN	NaN	NaN	NaN	NaN	NaN	NaN
636	1.026	NaN	NaN	NaN	NaN	NaN	NaN	NaN	NaN	NaN	NaN	NaN	NaN	NaN	NaN	NaN	NaN	NaN	NaN	NaN	NaN	NaN	NaN	NaN	NaN
637	1.059	NaN	NaN	NaN	NaN	NaN	NaN	NaN	NaN	NaN	NaN	NaN	NaN	NaN	NaN	NaN	NaN	NaN	NaN	NaN	NaN	NaN	NaN	NaN	NaN
638	1.014	NaN	NaN	NaN	NaN	NaN	NaN	NaN	NaN	NaN	NaN	NaN	NaN	NaN	NaN	NaN	NaN	NaN	NaN	NaN	NaN	NaN	NaN	NaN	NaN
639	1.11	NaN	NaN	NaN	NaN	NaN	NaN	NaN	NaN	NaN	NaN	NaN	NaN	NaN	NaN	NaN	NaN	NaN	NaN	NaN	NaN	NaN	NaN	NaN	NaN
640	1.036	NaN	NaN	NaN	NaN	NaN	NaN	NaN	NaN	NaN	NaN	NaN	NaN	NaN	NaN	NaN	NaN	NaN	NaN	NaN	NaN	NaN	NaN	NaN	NaN
641	1.024	NaN	NaN	NaN	NaN	NaN	NaN	NaN	NaN	NaN	NaN	NaN	NaN	NaN	NaN	NaN	NaN	NaN	NaN	NaN	NaN	NaN	NaN	NaN	NaN
642	0.928	NaN	NaN	NaN	NaN	NaN	NaN	NaN	NaN	NaN	NaN	NaN	NaN	NaN	NaN	NaN	NaN	NaN	NaN	NaN	NaN	NaN	NaN	NaN	NaN
643	0.93	NaN	NaN	NaN	NaN	NaN	NaN	NaN	NaN	NaN	NaN	NaN	NaN	NaN	NaN	NaN	NaN	NaN	NaN	NaN	NaN	NaN	NaN	NaN	NaN
644	0.921	NaN	NaN	NaN	NaN	NaN	NaN	NaN	NaN	NaN	NaN	NaN	NaN	NaN	NaN	NaN	NaN	NaN	NaN	NaN	NaN	NaN	NaN	NaN	NaN
645	0.901	NaN	NaN	NaN	NaN	NaN	NaN	NaN	NaN	NaN	NaN	NaN	NaN	NaN	NaN	NaN	NaN	NaN	NaN	NaN	NaN	NaN	NaN	NaN	NaN
646	1.054	NaN	NaN	NaN	NaN	NaN	NaN	NaN	NaN	NaN	NaN	NaN	NaN	NaN	NaN	NaN	NaN	NaN	NaN	NaN	NaN	NaN	NaN	NaN	NaN
647	1.238	NaN	NaN	NaN	NaN	NaN	NaN	NaN	NaN	NaN	NaN	NaN	NaN	NaN	NaN	NaN	NaN	NaN	NaN	NaN	NaN	NaN	NaN	NaN	NaN
648	1.236	NaN	NaN	NaN	NaN	NaN	NaN	NaN	NaN	NaN	NaN	NaN	NaN	NaN	NaN	NaN	NaN	NaN	NaN	NaN	NaN	NaN	NaN	NaN	NaN
649	1.082	NaN	NaN	NaN	NaN	NaN	NaN	NaN	NaN	NaN	NaN	NaN	NaN	NaN	NaN	NaN	NaN	NaN	NaN	NaN	NaN	NaN	NaN	NaN	NaN
650	1.027	NaN	NaN	NaN	NaN	NaN	NaN	NaN	NaN	NaN	NaN	NaN	NaN	NaN	NaN	NaN	NaN	NaN	NaN	NaN	NaN	NaN	NaN	NaN	NaN
651	1.11	NaN	NaN	NaN	NaN	NaN	NaN	NaN	NaN	NaN	NaN	NaN	NaN	NaN	NaN	NaN	NaN	NaN	NaN	NaN	NaN	NaN	NaN	NaN	NaN
652	0.952	NaN	NaN	NaN	NaN	NaN	NaN	NaN	NaN	NaN	NaN	NaN	NaN	NaN	NaN	NaN	NaN	NaN	NaN	NaN	NaN	NaN	NaN	NaN	NaN
653	1.075	NaN	NaN	NaN	NaN	NaN	NaN	NaN	NaN	NaN	NaN	NaN	NaN	NaN	NaN	NaN	NaN	NaN	NaN	NaN	NaN	NaN	NaN	NaN	NaN
654	1.034	NaN	NaN	NaN	NaN	NaN	NaN	NaN	NaN	NaN	NaN	NaN	NaN	NaN	NaN	NaN	NaN	NaN	NaN	NaN	NaN	NaN	NaN	NaN	NaN
655	0.935	NaN	NaN	NaN	NaN	NaN	NaN	NaN	NaN	NaN	NaN	NaN	NaN	NaN	NaN	NaN	NaN	NaN	NaN	NaN	NaN	NaN	NaN	NaN	NaN
656	0.883	NaN	NaN	NaN	NaN	NaN	NaN	NaN	NaN	NaN	NaN	NaN	NaN	NaN	NaN	NaN	NaN	NaN	NaN	NaN	NaN	NaN	NaN	NaN	NaN
657	0.889	NaN	NaN	NaN	NaN	NaN	NaN	NaN	NaN	NaN	NaN	NaN	NaN	NaN	NaN	NaN	NaN	NaN	NaN	NaN	NaN	NaN	NaN	NaN	NaN
658	0.81	NaN	NaN	NaN	NaN	NaN	NaN	NaN	NaN	NaN	NaN	NaN	NaN	NaN	NaN	NaN	NaN	NaN	NaN	NaN	NaN	NaN	NaN	NaN	NaN
659	0.845	NaN	NaN	NaN	NaN	NaN	NaN	NaN	NaN	NaN	NaN	NaN	NaN	NaN	NaN	NaN	NaN	NaN	NaN	NaN	NaN	NaN	NaN	NaN	NaN
660	0.67	NaN	NaN	NaN	NaN	NaN	NaN	NaN	NaN	NaN	NaN	NaN	NaN	NaN	NaN	NaN	NaN	NaN	NaN	NaN	NaN	NaN	NaN	NaN	NaN
661	0.889	NaN	NaN	NaN	NaN	NaN	NaN	NaN	NaN	NaN	NaN	NaN	NaN	NaN	NaN	NaN	NaN	NaN	NaN	NaN	NaN	NaN	NaN	NaN	NaN
662	0.87	NaN	NaN	NaN	NaN	NaN	NaN	NaN	NaN	NaN	NaN	NaN	NaN	NaN	NaN	NaN	NaN	NaN	NaN	NaN	NaN	NaN	NaN	NaN	NaN
663	0.939	NaN	NaN	NaN	NaN	NaN	NaN	NaN	NaN	NaN	NaN	NaN	NaN	NaN	NaN	NaN	NaN	NaN	NaN	NaN	NaN	NaN	NaN	NaN	NaN
664	0.782	NaN	NaN	NaN	NaN	NaN	NaN	NaN	NaN	NaN	NaN	NaN	NaN	NaN	NaN	NaN	NaN	NaN	NaN	NaN	NaN	NaN	NaN	NaN	NaN
665	0.785	NaN	NaN	NaN	NaN	NaN	NaN	NaN	NaN	NaN	NaN	NaN	NaN	NaN	NaN	NaN	NaN	NaN	NaN	NaN	NaN	NaN	NaN	NaN	NaN
666	0.827	NaN	NaN	NaN	NaN	NaN	NaN	NaN	NaN	NaN	NaN	NaN	NaN	NaN	NaN	NaN	NaN	NaN	NaN	NaN	NaN	NaN	NaN	NaN	NaN
667	0.99	NaN	NaN	NaN	NaN	NaN	NaN	NaN	NaN	NaN	NaN	NaN	NaN	NaN	NaN	NaN	NaN	NaN	NaN	NaN	NaN	NaN	NaN	NaN	NaN
668	1.01	NaN	NaN	NaN	NaN	NaN	NaN	NaN	NaN	NaN	NaN	NaN	NaN	NaN	NaN	NaN	NaN	NaN	NaN	NaN	NaN	NaN	NaN	NaN	NaN
669	0.902	NaN	NaN	NaN	NaN	NaN	NaN	NaN	NaN	NaN	NaN	NaN	NaN	NaN	NaN	NaN	NaN	NaN	NaN	NaN	NaN	NaN	NaN	NaN	NaN
670	0.854	NaN	NaN	NaN	NaN	NaN	NaN	NaN	NaN	NaN	NaN	NaN	NaN	NaN	NaN	NaN	NaN	NaN	NaN	NaN	NaN	NaN	NaN	NaN	NaN
671	0.885	NaN	NaN	NaN	NaN	NaN	NaN	NaN	NaN	NaN	NaN	NaN	NaN	NaN	NaN	NaN	NaN	NaN	NaN	NaN	NaN	NaN	NaN	NaN	NaN
672	0.788	NaN	NaN	NaN	NaN	NaN	NaN	NaN	NaN	NaN	NaN	NaN	NaN	NaN	NaN	NaN	NaN	NaN	NaN	NaN	NaN	NaN	NaN	NaN	NaN
673	0.892	NaN	NaN	NaN	NaN	NaN	NaN	NaN	NaN	NaN	NaN	NaN	NaN	NaN	NaN	NaN	NaN	NaN	NaN	NaN	NaN	NaN	NaN	NaN	NaN
674	0.852	NaN	NaN	NaN	NaN	NaN	NaN	NaN	NaN	NaN	NaN	NaN	NaN	NaN	NaN	NaN	NaN	NaN	NaN	NaN	NaN	NaN	NaN	NaN	NaN
675	0.784	NaN	NaN	NaN	NaN	NaN	NaN	NaN	NaN	NaN	NaN	NaN	NaN	NaN	NaN	NaN	NaN	NaN	NaN	NaN	NaN	NaN	NaN	NaN	NaN
676	0.686	NaN	NaN	NaN	NaN	NaN	NaN	NaN	NaN	NaN	NaN	NaN	NaN	NaN	NaN	NaN	NaN	NaN	NaN	NaN	NaN	NaN	NaN	NaN	NaN
677	0.698	NaN	NaN	NaN	NaN	NaN	NaN	NaN	NaN	NaN	NaN	NaN	NaN	NaN	NaN	NaN	NaN	NaN	NaN	NaN	NaN	NaN	NaN	NaN	NaN
678	0.753	NaN	NaN	NaN	NaN	NaN	NaN	NaN	NaN	NaN	NaN	NaN	NaN	NaN	NaN	NaN	NaN	NaN	NaN	NaN	NaN	NaN	NaN	NaN	NaN
679	0.846	NaN	NaN	NaN	NaN	NaN	NaN	NaN	NaN	NaN	NaN	NaN	NaN	NaN	NaN	NaN	NaN	NaN	NaN	NaN	NaN	NaN	NaN	NaN	NaN
680	0.888	NaN	NaN	NaN	NaN	NaN	NaN	NaN	NaN	NaN	NaN	NaN	NaN	NaN	NaN	NaN	NaN	NaN	NaN	NaN	NaN	NaN	NaN	NaN	NaN
681	0.676	NaN	NaN	NaN	NaN	NaN	NaN	NaN	NaN	NaN	NaN	NaN	NaN	NaN	NaN	NaN	NaN	NaN	NaN	NaN	NaN	NaN	NaN	NaN	NaN
682	0.733	NaN	NaN	NaN	NaN	NaN	NaN	NaN	NaN	NaN	NaN	NaN	NaN	NaN	NaN	NaN	NaN	NaN	NaN	NaN	NaN	NaN	NaN	NaN	NaN
683	0.61	NaN	NaN	NaN	NaN	NaN	NaN	NaN	NaN	NaN	NaN	NaN	NaN	NaN	NaN	NaN	NaN	NaN	NaN	NaN	NaN	NaN	NaN	NaN	NaN
684	0.77	NaN	NaN	NaN	NaN	NaN	NaN	NaN	NaN	NaN	NaN	NaN	NaN	NaN	NaN	NaN	NaN	NaN	NaN	NaN	NaN	NaN	NaN	NaN	NaN
685	0.804	NaN	NaN	NaN	NaN	NaN	NaN	NaN	NaN	NaN	NaN	NaN	NaN	NaN	NaN	NaN	NaN	NaN	NaN	NaN	NaN	NaN	NaN	NaN	NaN
686	0.674	NaN	NaN	NaN	NaN	NaN	NaN	NaN	NaN	NaN	NaN	NaN	NaN	NaN	NaN	NaN	NaN	NaN	NaN	NaN	NaN	NaN	NaN	NaN	NaN
687	0.85	NaN	NaN	NaN	NaN	NaN	NaN	NaN	NaN	NaN	NaN	NaN	NaN	NaN	NaN	NaN	NaN	NaN	NaN	NaN	NaN	NaN	NaN	NaN	NaN
688	0.845	NaN	NaN	NaN	NaN	NaN	NaN	NaN	NaN	NaN	NaN	NaN	NaN	NaN	NaN	NaN	NaN	NaN	NaN	NaN	NaN	NaN	NaN	NaN	NaN
689	0.878	NaN	NaN	NaN	NaN	NaN	NaN	NaN	NaN	NaN	NaN	NaN	NaN	NaN	NaN	NaN	NaN	NaN	NaN	NaN	NaN	NaN	NaN	NaN	NaN
690	0.81	NaN	NaN	NaN	NaN	NaN	NaN	NaN	NaN	NaN	NaN	NaN	NaN	NaN	NaN	NaN	NaN	NaN	NaN	NaN	NaN	NaN	NaN	NaN	NaN
691	0.752	NaN	NaN	NaN	NaN	NaN	NaN	NaN	NaN	NaN	NaN	NaN	NaN	NaN	NaN	NaN	NaN	NaN	NaN	NaN	NaN	NaN	NaN	NaN	NaN
692	0.75	NaN	NaN	NaN	NaN	NaN	NaN	NaN	NaN	NaN	NaN	NaN	NaN	NaN	NaN	NaN	NaN	NaN	NaN	NaN	NaN	NaN	NaN	NaN	NaN
693	0.929	NaN	NaN	NaN	NaN	NaN	NaN	NaN	NaN	NaN	NaN	NaN	NaN	NaN	NaN	NaN	NaN	NaN	NaN	NaN	NaN	NaN	NaN	NaN	NaN
694	0.979	NaN	NaN	NaN	NaN	NaN	NaN	NaN	NaN	NaN	NaN	NaN	NaN	NaN	NaN	NaN	NaN	NaN	NaN	NaN	NaN	NaN	NaN	NaN	NaN
695	1.017	NaN	NaN	NaN	NaN	NaN	NaN	NaN	NaN	NaN	NaN	NaN	NaN	NaN	NaN	NaN	NaN	NaN	NaN	NaN	NaN	NaN	NaN	NaN	NaN
696	1.022	NaN	NaN	NaN	NaN	NaN	NaN	NaN	NaN	NaN	NaN	NaN	NaN	NaN	NaN	NaN	NaN	NaN	NaN	NaN	NaN	NaN	NaN	NaN	NaN
697	0.88	NaN	NaN	NaN	NaN	NaN	NaN	NaN	NaN	NaN	NaN	NaN	NaN	NaN	NaN	NaN	NaN	NaN	NaN	NaN	NaN	NaN	NaN	NaN	NaN
698	0.832	NaN	NaN	NaN	NaN	NaN	NaN	NaN	NaN	NaN	NaN	NaN	NaN	NaN	NaN	NaN	NaN	NaN	NaN	NaN	NaN	NaN	NaN	NaN	NaN
699	0.887	NaN	NaN	NaN	NaN	NaN	NaN	NaN	NaN	NaN	NaN	NaN	NaN	NaN	NaN	NaN	NaN	NaN	NaN	NaN	NaN	NaN	NaN	NaN	NaN
700	0.718	NaN	NaN	NaN	NaN	NaN	NaN	NaN	NaN	NaN	NaN	NaN	NaN	NaN	NaN	NaN	NaN	NaN	NaN	NaN	NaN	NaN	NaN	NaN	NaN
701	0.843	NaN	NaN	NaN	NaN	NaN	NaN	NaN	NaN	NaN	NaN	NaN	NaN	NaN	NaN	NaN	NaN	NaN	NaN	NaN	NaN	NaN	NaN	NaN	NaN
702	0.828	NaN	NaN	NaN	NaN	NaN	NaN	NaN	NaN	NaN	NaN	NaN	NaN	NaN	NaN	NaN	NaN	NaN	NaN	NaN	NaN	NaN	NaN	NaN	NaN
703	0.833	NaN	NaN	NaN	NaN	NaN	NaN	NaN	NaN	NaN	NaN	NaN	NaN	NaN	NaN	NaN	NaN	NaN	NaN	NaN	NaN	NaN	NaN	NaN	NaN
704	0.753	NaN	NaN	NaN	NaN	NaN	NaN	NaN	NaN	NaN	NaN	NaN	NaN	NaN	NaN	NaN	NaN	NaN	NaN	NaN	NaN	NaN	NaN	NaN	NaN
705	0.701	NaN	NaN	NaN	NaN	NaN	NaN	NaN	NaN	NaN	NaN	NaN	NaN	NaN	NaN	NaN	NaN	NaN	NaN	NaN	NaN	NaN	NaN	NaN	NaN
706	0.911	NaN	NaN	NaN	NaN	NaN	NaN	NaN	NaN	NaN	NaN	NaN	NaN	NaN	NaN	NaN	NaN	NaN	NaN	NaN	NaN	NaN	NaN	NaN	NaN
707	0.876	NaN	NaN	NaN	NaN	NaN	NaN	NaN	NaN	NaN	NaN	NaN	NaN	NaN	NaN	NaN	NaN	NaN	NaN	NaN	NaN	NaN	NaN	NaN	NaN
708	0.647	NaN	NaN	NaN	NaN	NaN	NaN	NaN	NaN	NaN	NaN	NaN	NaN	NaN	NaN	NaN	NaN	NaN	NaN	NaN	NaN	NaN	NaN	NaN	NaN
709	0.766	NaN	NaN	NaN	NaN	NaN	NaN	NaN	NaN	NaN	NaN	NaN	NaN	NaN	NaN	NaN	NaN	NaN	NaN	NaN	NaN	NaN	NaN	NaN	NaN
710	0.82	NaN	NaN	NaN	NaN	NaN	NaN	NaN	NaN	NaN	NaN	NaN	NaN	NaN	NaN	NaN	NaN	NaN	NaN	NaN	NaN	NaN	NaN	NaN	NaN
711	0.732	NaN	NaN	NaN	NaN	NaN	NaN	NaN	NaN	NaN	NaN	NaN	NaN	NaN	NaN	NaN	NaN	NaN	NaN	NaN	NaN	NaN	NaN	NaN	NaN
712	0.7	NaN	NaN	NaN	NaN	NaN	NaN	NaN	NaN	NaN	NaN	NaN	NaN	NaN	NaN	NaN	NaN	NaN	NaN	NaN	NaN	NaN	NaN	NaN	NaN
713	0.713	NaN	NaN	NaN	NaN	NaN	NaN	NaN	NaN	NaN	NaN	NaN	NaN	NaN	NaN	NaN	NaN	NaN	NaN	NaN	NaN	NaN	NaN	NaN	NaN
714	0.844	NaN	NaN	NaN	NaN	NaN	NaN	NaN	NaN	NaN	NaN	NaN	NaN	NaN	NaN	NaN	NaN	NaN	NaN	NaN	NaN	NaN	NaN	NaN	NaN
715	0.947	NaN	NaN	NaN	NaN	NaN	NaN	NaN	NaN	NaN	NaN	NaN	NaN	NaN	NaN	NaN	NaN	NaN	NaN	NaN	NaN	NaN	NaN	NaN	NaN
716	0.903	NaN	NaN	NaN	NaN	NaN	NaN	NaN	NaN	NaN	NaN	NaN	NaN	NaN	NaN	NaN	NaN	NaN	NaN	NaN	NaN	NaN	NaN	NaN	NaN
717	1.042	NaN	NaN	NaN	NaN	NaN	NaN	NaN	NaN	NaN	NaN	NaN	NaN	NaN	NaN	NaN	NaN	NaN	NaN	NaN	NaN	NaN	NaN	NaN	NaN
718	1.056	NaN	NaN	NaN	NaN	NaN	NaN	NaN	NaN	NaN	NaN	NaN	NaN	NaN	NaN	NaN	NaN	NaN	NaN	NaN	NaN	NaN	NaN	NaN	NaN
719	0.878	NaN	NaN	NaN	NaN	NaN	NaN	NaN	NaN	NaN	NaN	NaN	NaN	NaN	NaN	NaN	NaN	NaN	NaN	NaN	NaN	NaN	NaN	NaN	NaN
720	1.02	NaN	NaN	NaN	NaN	NaN	NaN	NaN	NaN	NaN	NaN	NaN	NaN	NaN	NaN	NaN	NaN	NaN	NaN	NaN	NaN	NaN	NaN	NaN	NaN
721	1.029	NaN	NaN	NaN	NaN	NaN	NaN	NaN	NaN	NaN	NaN	NaN	NaN	NaN	NaN	NaN	NaN	NaN	NaN	NaN	NaN	NaN	NaN	NaN	NaN
722	0.939	NaN	NaN	NaN	NaN	NaN	NaN	NaN	NaN	NaN	NaN	NaN	NaN	NaN	NaN	NaN	NaN	NaN	NaN	NaN	NaN	NaN	NaN	NaN	NaN
723	1.122	NaN	NaN	NaN	NaN	NaN	NaN	NaN	NaN	NaN	NaN	NaN	NaN	NaN	NaN	NaN	NaN	NaN	NaN	NaN	NaN	NaN	NaN	NaN	NaN
724	1.118	NaN	NaN	NaN	NaN	NaN	NaN	NaN	NaN	NaN	NaN	NaN	NaN	NaN	NaN	NaN	NaN	NaN	NaN	NaN	NaN	NaN	NaN	NaN	NaN
725	1.181	NaN	NaN	NaN	NaN	NaN	NaN	NaN	NaN	NaN	NaN	NaN	NaN	NaN	NaN	NaN	NaN	NaN	NaN	NaN	NaN	NaN	NaN	NaN	NaN
726	1.28	NaN	NaN	NaN	NaN	NaN	NaN	NaN	NaN	NaN	NaN	NaN	NaN	NaN	NaN	NaN	NaN	NaN	NaN	NaN	NaN	NaN	NaN	NaN	NaN
727	1.045	NaN	NaN	NaN	NaN	NaN	NaN	NaN	NaN	NaN	NaN	NaN	NaN	NaN	NaN	NaN	NaN	NaN	NaN	NaN	NaN	NaN	NaN	NaN	NaN
728	1.175	NaN	NaN	NaN	NaN	NaN	NaN	NaN	NaN	NaN	NaN	NaN	NaN	NaN	NaN	NaN	NaN	NaN	NaN	NaN	NaN	NaN	NaN	NaN	NaN
729	1.103	NaN	NaN	NaN	NaN	NaN	NaN	NaN	NaN	NaN	NaN	NaN	NaN	NaN	NaN	NaN	NaN	NaN	NaN	NaN	NaN	NaN	NaN	NaN	NaN
730	1.129	NaN	NaN	NaN	NaN	NaN	NaN	NaN	NaN	NaN	NaN	NaN	NaN	NaN	NaN	NaN	NaN	NaN	NaN	NaN	NaN	NaN	NaN	NaN	NaN
731	1.171	NaN	NaN	NaN	NaN	NaN	NaN	NaN	NaN	NaN	NaN	NaN	NaN	NaN	NaN	NaN	NaN	NaN	NaN	NaN	NaN	NaN	NaN	NaN	NaN
732	1.02	NaN	NaN	NaN	NaN	NaN	NaN	NaN	NaN	NaN	NaN	NaN	NaN	NaN	NaN	NaN	NaN	NaN	NaN	NaN	NaN	NaN	NaN	NaN	NaN
733	0.908	NaN	NaN	NaN	NaN	NaN	NaN	NaN	NaN	NaN	NaN	NaN	NaN	NaN	NaN	NaN	NaN	NaN	NaN	NaN	NaN	NaN	NaN	NaN	NaN
734	0.901	NaN	NaN	NaN	NaN	NaN	NaN	NaN	NaN	NaN	NaN	NaN	NaN	NaN	NaN	NaN	NaN	NaN	NaN	NaN	NaN	NaN	NaN	NaN	NaN
735	1.008	NaN	NaN	NaN	NaN	NaN	NaN	NaN	NaN	NaN	NaN	NaN	NaN	NaN	NaN	NaN	NaN	NaN	NaN	NaN	NaN	NaN	NaN	NaN	NaN
736	1.034	NaN	NaN	NaN	NaN	NaN	NaN	NaN	NaN	NaN	NaN	NaN	NaN	NaN	NaN	NaN	NaN	NaN	NaN	NaN	NaN	NaN	NaN	NaN	NaN
737	0.823	NaN	NaN	NaN	NaN	NaN	NaN	NaN	NaN	NaN	NaN	NaN	NaN	NaN	NaN	NaN	NaN	NaN	NaN	NaN	NaN	NaN	NaN	NaN	NaN
738	0.716	NaN	NaN	NaN	NaN	NaN	NaN	NaN	NaN	NaN	NaN	NaN	NaN	NaN	NaN	NaN	NaN	NaN	NaN	NaN	NaN	NaN	NaN	NaN	NaN
739	0.874	NaN	NaN	NaN	NaN	NaN	NaN	NaN	NaN	NaN	NaN	NaN	NaN	NaN	NaN	NaN	NaN	NaN	NaN	NaN	NaN	NaN	NaN	NaN	NaN
740	0.852	NaN	NaN	NaN	NaN	NaN	NaN	NaN	NaN	NaN	NaN	NaN	NaN	NaN	NaN	NaN	NaN	NaN	NaN	NaN	NaN	NaN	NaN	NaN	NaN
741	0.845	NaN	NaN	NaN	NaN	NaN	NaN	NaN	NaN	NaN	NaN	NaN	NaN	NaN	NaN	NaN	NaN	NaN	NaN	NaN	NaN	NaN	NaN	NaN	NaN
742	0.953	NaN	NaN	NaN	NaN	NaN	NaN	NaN	NaN	NaN	NaN	NaN	NaN	NaN	NaN	NaN	NaN	NaN	NaN	NaN	NaN	NaN	NaN	NaN	NaN
743	0.81	NaN	NaN	NaN	NaN	NaN	NaN	NaN	NaN	NaN	NaN	NaN	NaN	NaN	NaN	NaN	NaN	NaN	NaN	NaN	NaN	NaN	NaN	NaN	NaN
744	0.989	NaN	NaN	NaN	NaN	NaN	NaN	NaN	NaN	NaN	NaN	NaN	NaN	NaN	NaN	NaN	NaN	NaN	NaN	NaN	NaN	NaN	NaN	NaN	NaN
745	0.795	NaN	NaN	NaN	NaN	NaN	NaN	NaN	NaN	NaN	NaN	NaN	NaN	NaN	NaN	NaN	NaN	NaN	NaN	NaN	NaN	NaN	NaN	NaN	NaN
746	0.859	NaN	NaN	NaN	NaN	NaN	NaN	NaN	NaN	NaN	NaN	NaN	NaN	NaN	NaN	NaN	NaN	NaN	NaN	NaN	NaN	NaN	NaN	NaN	NaN
747	0.843	NaN	NaN	NaN	NaN	NaN	NaN	NaN	NaN	NaN	NaN	NaN	NaN	NaN	NaN	NaN	NaN	NaN	NaN	NaN	NaN	NaN	NaN	NaN	NaN
748	0.931	NaN	NaN	NaN	NaN	NaN	NaN	NaN	NaN	NaN	NaN	NaN	NaN	NaN	NaN	NaN	NaN	NaN	NaN	NaN	NaN	NaN	NaN	NaN	NaN
749	0.782	NaN	NaN	NaN	NaN	NaN	NaN	NaN	NaN	NaN	NaN	NaN	NaN	NaN	NaN	NaN	NaN	NaN	NaN	NaN	NaN	NaN	NaN	NaN	NaN
750	0.845	NaN	NaN	NaN	NaN	NaN	NaN	NaN	NaN	NaN	NaN	NaN	NaN	NaN	NaN	NaN	NaN	NaN	NaN	NaN	NaN	NaN	NaN	NaN	NaN
751	0.675	NaN	NaN	NaN	NaN	NaN	NaN	NaN	NaN	NaN	NaN	NaN	NaN	NaN	NaN	NaN	NaN	NaN	NaN	NaN	NaN	NaN	NaN	NaN	NaN
752	0.759	NaN	NaN	NaN	NaN	NaN	NaN	NaN	NaN	NaN	NaN	NaN	NaN	NaN	NaN	NaN	NaN	NaN	NaN	NaN	NaN	NaN	NaN	NaN	NaN
753	0.92	NaN	NaN	NaN	NaN	NaN	NaN	NaN	NaN	NaN	NaN	NaN	NaN	NaN	NaN	NaN	NaN	NaN	NaN	NaN	NaN	NaN	NaN	NaN	NaN
754	0.999	NaN	NaN	NaN	NaN	NaN	NaN	NaN	NaN	NaN	NaN	NaN	NaN	NaN	NaN	NaN	NaN	NaN	NaN	NaN	NaN	NaN	NaN	NaN	NaN
755	1.133	NaN	NaN	NaN	NaN	NaN	NaN	NaN	NaN	NaN	NaN	NaN	NaN	NaN	NaN	NaN	NaN	NaN	NaN	NaN	NaN	NaN	NaN	NaN	NaN
756	0.998	NaN	NaN	NaN	NaN	NaN	NaN	NaN	NaN	NaN	NaN	NaN	NaN	NaN	NaN	NaN	NaN	NaN	NaN	NaN	NaN	NaN	NaN	NaN	NaN
757	0.96	NaN	NaN	NaN	NaN	NaN	NaN	NaN	NaN	NaN	NaN	NaN	NaN	NaN	NaN	NaN	NaN	NaN	NaN	NaN	NaN	NaN	NaN	NaN	NaN
758	1.052	NaN	NaN	NaN	NaN	NaN	NaN	NaN	NaN	NaN	NaN	NaN	NaN	NaN	NaN	NaN	NaN	NaN	NaN	NaN	NaN	NaN	NaN	NaN	NaN
759	0.997	NaN	NaN	NaN	NaN	NaN	NaN	NaN	NaN	NaN	NaN	NaN	NaN	NaN	NaN	NaN	NaN	NaN	NaN	NaN	NaN	NaN	NaN	NaN	NaN
760	0.886	NaN	NaN	NaN	NaN	NaN	NaN	NaN	NaN	NaN	NaN	NaN	NaN	NaN	NaN	NaN	NaN	NaN	NaN	NaN	NaN	NaN	NaN	NaN	NaN
761	0.917	NaN	NaN	NaN	NaN	NaN	NaN	NaN	NaN	NaN	NaN	NaN	NaN	NaN	NaN	NaN	NaN	NaN	NaN	NaN	NaN	NaN	NaN	NaN	NaN
762	0.862	NaN	NaN	NaN	NaN	NaN	NaN	NaN	NaN	NaN	NaN	NaN	NaN	NaN	NaN	NaN	NaN	NaN	NaN	NaN	NaN	NaN	NaN	NaN	NaN
763	0.991	NaN	NaN	NaN	NaN	NaN	NaN	NaN	NaN	NaN	NaN	NaN	NaN	NaN	NaN	NaN	NaN	NaN	NaN	NaN	NaN	NaN	NaN	NaN	NaN
764	1.012	NaN	NaN	NaN	NaN	NaN	NaN	NaN	NaN	NaN	NaN	NaN	NaN	NaN	NaN	NaN	NaN	NaN	NaN	NaN	NaN	NaN	NaN	NaN	NaN
765	0.983	NaN	NaN	NaN	NaN	NaN	NaN	NaN	NaN	NaN	NaN	NaN	NaN	NaN	NaN	NaN	NaN	NaN	NaN	NaN	NaN	NaN	NaN	NaN	NaN
766	0.951	NaN	NaN	NaN	NaN	NaN	NaN	NaN	NaN	NaN	NaN	NaN	NaN	NaN	NaN	NaN	NaN	NaN	NaN	NaN	NaN	NaN	NaN	NaN	NaN
767	0.877	NaN	NaN	NaN	NaN	NaN	NaN	NaN	NaN	NaN	NaN	NaN	NaN	NaN	NaN	NaN	NaN	NaN	NaN	NaN	NaN	NaN	NaN	NaN	NaN
768	0.857	NaN	NaN	NaN	NaN	NaN	NaN	NaN	NaN	NaN	NaN	NaN	NaN	NaN	NaN	NaN	NaN	NaN	NaN	NaN	NaN	NaN	NaN	NaN	NaN
769	0.9	NaN	NaN	NaN	NaN	NaN	NaN	NaN	NaN	NaN	NaN	NaN	NaN	NaN	NaN	NaN	NaN	NaN	NaN	NaN	NaN	NaN	NaN	NaN	NaN
770	0.743	NaN	NaN	NaN	NaN	NaN	NaN	NaN	NaN	NaN	NaN	NaN	NaN	NaN	NaN	NaN	NaN	NaN	NaN	NaN	NaN	NaN	NaN	NaN	NaN
771	0.931	NaN	NaN	NaN	NaN	NaN	NaN	NaN	NaN	NaN	NaN	NaN	NaN	NaN	NaN	NaN	NaN	NaN	NaN	NaN	NaN	NaN	NaN	NaN	NaN
772	0.764	NaN	NaN	NaN	NaN	NaN	NaN	NaN	NaN	NaN	NaN	NaN	NaN	NaN	NaN	NaN	NaN	NaN	NaN	NaN	NaN	NaN	NaN	NaN	NaN
773	0.862	NaN	NaN	NaN	NaN	NaN	NaN	NaN	NaN	NaN	NaN	NaN	NaN	NaN	NaN	NaN	NaN	NaN	NaN	NaN	NaN	NaN	NaN	NaN	NaN
774	0.838	NaN	NaN	NaN	NaN	NaN	NaN	NaN	NaN	NaN	NaN	NaN	NaN	NaN	NaN	NaN	NaN	NaN	NaN	NaN	NaN	NaN	NaN	NaN	NaN
775	0.882	NaN	NaN	NaN	NaN	NaN	NaN	NaN	NaN	NaN	NaN	NaN	NaN	NaN	NaN	NaN	NaN	NaN	NaN	NaN	NaN	NaN	NaN	NaN	NaN
776	1.018	NaN	NaN	NaN	NaN	NaN	NaN	NaN	NaN	NaN	NaN	NaN	NaN	NaN	NaN	NaN	NaN	NaN	NaN	NaN	NaN	NaN	NaN	NaN	NaN
777	0.951	NaN	NaN	NaN	NaN	NaN	NaN	NaN	NaN	NaN	NaN	NaN	NaN	NaN	NaN	NaN	NaN	NaN	NaN	NaN	NaN	NaN	NaN	NaN	NaN
778	0.83	NaN	NaN	NaN	NaN	NaN	NaN	NaN	NaN	NaN	NaN	NaN	NaN	NaN	NaN	NaN	NaN	NaN	NaN	NaN	NaN	NaN	NaN	NaN	NaN
779	0.972	NaN	NaN	NaN	NaN	NaN	NaN	NaN	NaN	NaN	NaN	NaN	NaN	NaN	NaN	NaN	NaN	NaN	NaN	NaN	NaN	NaN	NaN	NaN	NaN
780	1.01	NaN	NaN	NaN	NaN	NaN	NaN	NaN	NaN	NaN	NaN	NaN	NaN	NaN	NaN	NaN	NaN	NaN	NaN	NaN	NaN	NaN	NaN	NaN	NaN
781	1.078	NaN	NaN	NaN	NaN	NaN	NaN	NaN	NaN	NaN	NaN	NaN	NaN	NaN	NaN	NaN	NaN	NaN	NaN	NaN	NaN	NaN	NaN	NaN	NaN
782	0.966	NaN	NaN	NaN	NaN	NaN	NaN	NaN	NaN	NaN	NaN	NaN	NaN	NaN	NaN	NaN	NaN	NaN	NaN	NaN	NaN	NaN	NaN	NaN	NaN
783	0.955	NaN	NaN	NaN	NaN	NaN	NaN	NaN	NaN	NaN	NaN	NaN	NaN	NaN	NaN	NaN	NaN	NaN	NaN	NaN	NaN	NaN	NaN	NaN	NaN
784	0.744	NaN	NaN	NaN	NaN	NaN	NaN	NaN	NaN	NaN	NaN	NaN	NaN	NaN	NaN	NaN	NaN	NaN	NaN	NaN	NaN	NaN	NaN	NaN	NaN
785	0.789	NaN	NaN	NaN	NaN	NaN	NaN	NaN	NaN	NaN	NaN	NaN	NaN	NaN	NaN	NaN	NaN	NaN	NaN	NaN	NaN	NaN	NaN	NaN	NaN
786	0.864	NaN	NaN	NaN	NaN	NaN	NaN	NaN	NaN	NaN	NaN	NaN	NaN	NaN	NaN	NaN	NaN	NaN	NaN	NaN	NaN	NaN	NaN	NaN	NaN
787	0.963	NaN	NaN	NaN	NaN	NaN	NaN	NaN	NaN	NaN	NaN	NaN	NaN	NaN	NaN	NaN	NaN	NaN	NaN	NaN	NaN	NaN	NaN	NaN	NaN
788	0.847	NaN	NaN	NaN	NaN	NaN	NaN	NaN	NaN	NaN	NaN	NaN	NaN	NaN	NaN	NaN	NaN	NaN	NaN	NaN	NaN	NaN	NaN	NaN	NaN
789	0.843	NaN	NaN	NaN	NaN	NaN	NaN	NaN	NaN	NaN	NaN	NaN	NaN	NaN	NaN	NaN	NaN	NaN	NaN	NaN	NaN	NaN	NaN	NaN	NaN
790	0.86	NaN	NaN	NaN	NaN	NaN	NaN	NaN	NaN	NaN	NaN	NaN	NaN	NaN	NaN	NaN	NaN	NaN	NaN	NaN	NaN	NaN	NaN	NaN	NaN
791	0.957	NaN	NaN	NaN	NaN	NaN	NaN	NaN	NaN	NaN	NaN	NaN	NaN	NaN	NaN	NaN	NaN	NaN	NaN	NaN	NaN	NaN	NaN	NaN	NaN
792	1.076	NaN	NaN	NaN	NaN	NaN	NaN	NaN	NaN	NaN	NaN	NaN	NaN	NaN	NaN	NaN	NaN	NaN	NaN	NaN	NaN	NaN	NaN	NaN	NaN
793	1.025	NaN	NaN	NaN	NaN	NaN	NaN	NaN	NaN	NaN	NaN	NaN	NaN	NaN	NaN	NaN	NaN	NaN	NaN	NaN	NaN	NaN	NaN	NaN	NaN
794	1.094	NaN	NaN	NaN	NaN	NaN	NaN	NaN	NaN	NaN	NaN	NaN	NaN	NaN	NaN	NaN	NaN	NaN	NaN	NaN	NaN	NaN	NaN	NaN	NaN
795	1.172	NaN	NaN	NaN	NaN	NaN	NaN	NaN	NaN	NaN	NaN	NaN	NaN	NaN	NaN	NaN	NaN	NaN	NaN	NaN	NaN	NaN	NaN	NaN	NaN
796	1.097	NaN	NaN	NaN	NaN	NaN	NaN	NaN	NaN	NaN	NaN	NaN	NaN	NaN	NaN	NaN	NaN	NaN	NaN	NaN	NaN	NaN	NaN	NaN	NaN
797	1.199	NaN	NaN	NaN	NaN	NaN	NaN	NaN	NaN	NaN	NaN	NaN	NaN	NaN	NaN	NaN	NaN	NaN	NaN	NaN	NaN	NaN	NaN	NaN	NaN
798	1.054	NaN	NaN	NaN	NaN	NaN	NaN	NaN	NaN	NaN	NaN	NaN	NaN	NaN	NaN	NaN	NaN	NaN	NaN	NaN	NaN	NaN	NaN	NaN	NaN
799	0.899	NaN	NaN	NaN	NaN	NaN	NaN	NaN	NaN	NaN	NaN	NaN	NaN	NaN	NaN	NaN	NaN	NaN	NaN	NaN	NaN	NaN	NaN	NaN	NaN
800	0.848	NaN	NaN	NaN	NaN	NaN	NaN	NaN	NaN	NaN	NaN	NaN	NaN	NaN	NaN	NaN	NaN	NaN	NaN	NaN	NaN	NaN	NaN	NaN	NaN
801	1.004	NaN	NaN	NaN	NaN	NaN	NaN	NaN	NaN	NaN	NaN	NaN	NaN	NaN	NaN	NaN	NaN	NaN	NaN	NaN	NaN	NaN	NaN	NaN	NaN
802	1.021	NaN	NaN	NaN	NaN	NaN	NaN	NaN	NaN	NaN	NaN	NaN	NaN	NaN	NaN	NaN	NaN	NaN	NaN	NaN	NaN	NaN	NaN	NaN	NaN
803	1.043	NaN	NaN	NaN	NaN	NaN	NaN	NaN	NaN	NaN	NaN	NaN	NaN	NaN	NaN	NaN	NaN	NaN	NaN	NaN	NaN	NaN	NaN	NaN	NaN
804	0.981	NaN	NaN	NaN	NaN	NaN	NaN	NaN	NaN	NaN	NaN	NaN	NaN	NaN	NaN	NaN	NaN	NaN	NaN	NaN	NaN	NaN	NaN	NaN	NaN
805	1.049	NaN	NaN	NaN	NaN	NaN	NaN	NaN	NaN	NaN	NaN	NaN	NaN	NaN	NaN	NaN	NaN	NaN	NaN	NaN	NaN	NaN	NaN	NaN	NaN
806	0.924	NaN	NaN	NaN	NaN	NaN	NaN	NaN	NaN	NaN	NaN	NaN	NaN	NaN	NaN	NaN	NaN	NaN	NaN	NaN	NaN	NaN	NaN	NaN	NaN
807	1.013	NaN	NaN	NaN	NaN	NaN	NaN	NaN	NaN	NaN	NaN	NaN	NaN	NaN	NaN	NaN	NaN	NaN	NaN	NaN	NaN	NaN	NaN	NaN	NaN
808	0.791	NaN	NaN	NaN	NaN	NaN	NaN	NaN	NaN	NaN	NaN	NaN	NaN	NaN	NaN	NaN	NaN	NaN	NaN	NaN	NaN	NaN	NaN	NaN	NaN
809	0.99	NaN	NaN	NaN	NaN	NaN	NaN	NaN	NaN	NaN	NaN	NaN	NaN	NaN	NaN	NaN	NaN	NaN	NaN	NaN	NaN	NaN	NaN	NaN	NaN
810	0.963	NaN	NaN	NaN	NaN	NaN	NaN	NaN	NaN	NaN	NaN	NaN	NaN	NaN	NaN	NaN	NaN	NaN	NaN	NaN	NaN	NaN	NaN	NaN	NaN
811	0.992	NaN	NaN	NaN	NaN	NaN	NaN	NaN	NaN	NaN	NaN	NaN	NaN	NaN	NaN	NaN	NaN	NaN	NaN	NaN	NaN	NaN	NaN	NaN	NaN
812	1.105	NaN	NaN	NaN	NaN	NaN	NaN	NaN	NaN	NaN	NaN	NaN	NaN	NaN	NaN	NaN	NaN	NaN	NaN	NaN	NaN	NaN	NaN	NaN	NaN
813	1.178	NaN	NaN	NaN	NaN	NaN	NaN	NaN	NaN	NaN	NaN	NaN	NaN	NaN	NaN	NaN	NaN	NaN	NaN	NaN	NaN	NaN	NaN	NaN	NaN
814	1.202	NaN	NaN	NaN	NaN	NaN	NaN	NaN	NaN	NaN	NaN	NaN	NaN	NaN	NaN	NaN	NaN	NaN	NaN	NaN	NaN	NaN	NaN	NaN	NaN
815	1.182	NaN	NaN	NaN	NaN	NaN	NaN	NaN	NaN	NaN	NaN	NaN	NaN	NaN	NaN	NaN	NaN	NaN	NaN	NaN	NaN	NaN	NaN	NaN	NaN
816	1.131	NaN	NaN	NaN	NaN	NaN	NaN	NaN	NaN	NaN	NaN	NaN	NaN	NaN	NaN	NaN	NaN	NaN	NaN	NaN	NaN	NaN	NaN	NaN	NaN
817	1.076	NaN	NaN	NaN	NaN	NaN	NaN	NaN	NaN	NaN	NaN	NaN	NaN	NaN	NaN	NaN	NaN	NaN	NaN	NaN	NaN	NaN	NaN	NaN	NaN
818	1.099	NaN	NaN	NaN	NaN	NaN	NaN	NaN	NaN	NaN	NaN	NaN	NaN	NaN	NaN	NaN	NaN	NaN	NaN	NaN	NaN	NaN	NaN	NaN	NaN
819	0.939	NaN	NaN	NaN	NaN	NaN	NaN	NaN	NaN	NaN	NaN	NaN	NaN	NaN	NaN	NaN	NaN	NaN	NaN	NaN	NaN	NaN	NaN	NaN	NaN
820	0.986	NaN	NaN	NaN	NaN	NaN	NaN	NaN	NaN	NaN	NaN	NaN	NaN	NaN	NaN	NaN	NaN	NaN	NaN	NaN	NaN	NaN	NaN	NaN	NaN
821	0.882	NaN	NaN	NaN	NaN	NaN	NaN	NaN	NaN	NaN	NaN	NaN	NaN	NaN	NaN	NaN	NaN	NaN	NaN	NaN	NaN	NaN	NaN	NaN	NaN
822	0.989	NaN	NaN	NaN	NaN	NaN	NaN	NaN	NaN	NaN	NaN	NaN	NaN	NaN	NaN	NaN	NaN	NaN	NaN	NaN	NaN	NaN	NaN	NaN	NaN
823	0.989	NaN	NaN	NaN	NaN	NaN	NaN	NaN	NaN	NaN	NaN	NaN	NaN	NaN	NaN	NaN	NaN	NaN	NaN	NaN	NaN	NaN	NaN	NaN	NaN
824	1.01	NaN	NaN	NaN	NaN	NaN	NaN	NaN	NaN	NaN	NaN	NaN	NaN	NaN	NaN	NaN	NaN	NaN	NaN	NaN	NaN	NaN	NaN	NaN	NaN
825	1.108	NaN	NaN	NaN	NaN	NaN	NaN	NaN	NaN	NaN	NaN	NaN	NaN	NaN	NaN	NaN	NaN	NaN	NaN	NaN	NaN	NaN	NaN	NaN	NaN
826	1.12	NaN	NaN	NaN	NaN	NaN	NaN	NaN	NaN	NaN	NaN	NaN	NaN	NaN	NaN	NaN	NaN	NaN	NaN	NaN	NaN	NaN	NaN	NaN	NaN
827	1.229	NaN	NaN	NaN	NaN	NaN	NaN	NaN	NaN	NaN	NaN	NaN	NaN	NaN	NaN	NaN	NaN	NaN	NaN	NaN	NaN	NaN	NaN	NaN	NaN
828	1.247	NaN	NaN	NaN	NaN	NaN	NaN	NaN	NaN	NaN	NaN	NaN	NaN	NaN	NaN	NaN	NaN	NaN	NaN	NaN	NaN	NaN	NaN	NaN	NaN
829	1.141	NaN	NaN	NaN	NaN	NaN	NaN	NaN	NaN	NaN	NaN	NaN	NaN	NaN	NaN	NaN	NaN	NaN	NaN	NaN	NaN	NaN	NaN	NaN	NaN
830	1.148	NaN	NaN	NaN	NaN	NaN	NaN	NaN	NaN	NaN	NaN	NaN	NaN	NaN	NaN	NaN	NaN	NaN	NaN	NaN	NaN	NaN	NaN	NaN	NaN
831	1.152	NaN	NaN	NaN	NaN	NaN	NaN	NaN	NaN	NaN	NaN	NaN	NaN	NaN	NaN	NaN	NaN	NaN	NaN	NaN	NaN	NaN	NaN	NaN	NaN
832	1.158	NaN	NaN	NaN	NaN	NaN	NaN	NaN	NaN	NaN	NaN	NaN	NaN	NaN	NaN	NaN	NaN	NaN	NaN	NaN	NaN	NaN	NaN	NaN	NaN
833	1.143	NaN	NaN	NaN	NaN	NaN	NaN	NaN	NaN	NaN	NaN	NaN	NaN	NaN	NaN	NaN	NaN	NaN	NaN	NaN	NaN	NaN	NaN	NaN	NaN
834	1.174	NaN	NaN	NaN	NaN	NaN	NaN	NaN	NaN	NaN	NaN	NaN	NaN	NaN	NaN	NaN	NaN	NaN	NaN	NaN	NaN	NaN	NaN	NaN	NaN
835	1.128	NaN	NaN	NaN	NaN	NaN	NaN	NaN	NaN	NaN	NaN	NaN	NaN	NaN	NaN	NaN	NaN	NaN	NaN	NaN	NaN	NaN	NaN	NaN	NaN
836	1.089	NaN	NaN	NaN	NaN	NaN	NaN	NaN	NaN	NaN	NaN	NaN	NaN	NaN	NaN	NaN	NaN	NaN	NaN	NaN	NaN	NaN	NaN	NaN	NaN
837	0.946	NaN	NaN	NaN	NaN	NaN	NaN	NaN	NaN	NaN	NaN	NaN	NaN	NaN	NaN	NaN	NaN	NaN	NaN	NaN	NaN	NaN	NaN	NaN	NaN
838	0.978	NaN	NaN	NaN	NaN	NaN	NaN	NaN	NaN	NaN	NaN	NaN	NaN	NaN	NaN	NaN	NaN	NaN	NaN	NaN	NaN	NaN	NaN	NaN	NaN
839	1.031	NaN	NaN	NaN	NaN	NaN	NaN	NaN	NaN	NaN	NaN	NaN	NaN	NaN	NaN	NaN	NaN	NaN	NaN	NaN	NaN	NaN	NaN	NaN	NaN
840	1.144	NaN	NaN	NaN	NaN	NaN	NaN	NaN	NaN	NaN	NaN	NaN	NaN	NaN	NaN	NaN	NaN	NaN	NaN	NaN	NaN	NaN	NaN	NaN	NaN
841	1.067	NaN	NaN	NaN	NaN	NaN	NaN	NaN	NaN	NaN	NaN	NaN	NaN	NaN	NaN	NaN	NaN	NaN	NaN	NaN	NaN	NaN	NaN	NaN	NaN
842	1.143	NaN	NaN	NaN	NaN	NaN	NaN	NaN	NaN	NaN	NaN	NaN	NaN	NaN	NaN	NaN	NaN	NaN	NaN	NaN	NaN	NaN	NaN	NaN	NaN
843	1.185	NaN	NaN	NaN	NaN	NaN	NaN	NaN	NaN	NaN	NaN	NaN	NaN	NaN	NaN	NaN	NaN	NaN	NaN	NaN	NaN	NaN	NaN	NaN	NaN
844	1.182	NaN	NaN	NaN	NaN	NaN	NaN	NaN	NaN	NaN	NaN	NaN	NaN	NaN	NaN	NaN	NaN	NaN	NaN	NaN	NaN	NaN	NaN	NaN	NaN
845	1.035	NaN	NaN	NaN	NaN	NaN	NaN	NaN	NaN	NaN	NaN	NaN	NaN	NaN	NaN	NaN	NaN	NaN	NaN	NaN	NaN	NaN	NaN	NaN	NaN
846	1.051	NaN	NaN	NaN	NaN	NaN	NaN	NaN	NaN	NaN	NaN	NaN	NaN	NaN	NaN	NaN	NaN	NaN	NaN	NaN	NaN	NaN	NaN	NaN	NaN
847	0.999	NaN	NaN	NaN	NaN	NaN	NaN	NaN	NaN	NaN	NaN	NaN	NaN	NaN	NaN	NaN	NaN	NaN	NaN	NaN	NaN	NaN	NaN	NaN	NaN
848	0.939	NaN	NaN	NaN	NaN	NaN	NaN	NaN	NaN	NaN	NaN	NaN	NaN	NaN	NaN	NaN	NaN	NaN	NaN	NaN	NaN	NaN	NaN	NaN	NaN
849	0.785	NaN	NaN	NaN	NaN	NaN	NaN	NaN	NaN	NaN	NaN	NaN	NaN	NaN	NaN	NaN	NaN	NaN	NaN	NaN	NaN	NaN	NaN	NaN	NaN
850	0.942	NaN	NaN	NaN	NaN	NaN	NaN	NaN	NaN	NaN	NaN	NaN	NaN	NaN	NaN	NaN	NaN	NaN	NaN	NaN	NaN	NaN	NaN	NaN	NaN
851	0.987	NaN	NaN	NaN	NaN	NaN	NaN	NaN	NaN	NaN	NaN	NaN	NaN	NaN	NaN	NaN	NaN	NaN	NaN	NaN	NaN	NaN	NaN	NaN	NaN
852	0.956	NaN	NaN	NaN	NaN	NaN	NaN	NaN	NaN	NaN	NaN	NaN	NaN	NaN	NaN	NaN	NaN	NaN	NaN	NaN	NaN	NaN	NaN	NaN	NaN
853	0.854	NaN	NaN	NaN	NaN	NaN	NaN	NaN	NaN	NaN	NaN	NaN	NaN	NaN	NaN	NaN	NaN	NaN	NaN	NaN	NaN	NaN	NaN	NaN	NaN
854	0.813	NaN	NaN	NaN	NaN	NaN	NaN	NaN	NaN	NaN	NaN	NaN	NaN	NaN	NaN	NaN	NaN	NaN	NaN	NaN	NaN	NaN	NaN	NaN	NaN
855	0.768	NaN	NaN	NaN	NaN	NaN	NaN	NaN	NaN	NaN	NaN	NaN	NaN	NaN	NaN	NaN	NaN	NaN	NaN	NaN	NaN	NaN	NaN	NaN	NaN
856	0.864	NaN	NaN	NaN	NaN	NaN	NaN	NaN	NaN	NaN	NaN	NaN	NaN	NaN	NaN	NaN	NaN	NaN	NaN	NaN	NaN	NaN	NaN	NaN	NaN
857	1.005	NaN	NaN	NaN	NaN	NaN	NaN	NaN	NaN	NaN	NaN	NaN	NaN	NaN	NaN	NaN	NaN	NaN	NaN	NaN	NaN	NaN	NaN	NaN	NaN
858	1.064	NaN	NaN	NaN	NaN	NaN	NaN	NaN	NaN	NaN	NaN	NaN	NaN	NaN	NaN	NaN	NaN	NaN	NaN	NaN	NaN	NaN	NaN	NaN	NaN
859	0.905	NaN	NaN	NaN	NaN	NaN	NaN	NaN	NaN	NaN	NaN	NaN	NaN	NaN	NaN	NaN	NaN	NaN	NaN	NaN	NaN	NaN	NaN	NaN	NaN
860	0.949	NaN	NaN	NaN	NaN	NaN	NaN	NaN	NaN	NaN	NaN	NaN	NaN	NaN	NaN	NaN	NaN	NaN	NaN	NaN	NaN	NaN	NaN	NaN	NaN
861	0.849	NaN	NaN	NaN	NaN	NaN	NaN	NaN	NaN	NaN	NaN	NaN	NaN	NaN	NaN	NaN	NaN	NaN	NaN	NaN	NaN	NaN	NaN	NaN	NaN
862	0.877	NaN	NaN	NaN	NaN	NaN	NaN	NaN	NaN	NaN	NaN	NaN	NaN	NaN	NaN	NaN	NaN	NaN	NaN	NaN	NaN	NaN	NaN	NaN	NaN
863	1.119	NaN	NaN	NaN	NaN	NaN	NaN	NaN	NaN	NaN	NaN	NaN	NaN	NaN	NaN	NaN	NaN	NaN	NaN	NaN	NaN	NaN	NaN	NaN	NaN
864	1.078	NaN	NaN	NaN	NaN	NaN	NaN	NaN	NaN	NaN	NaN	NaN	NaN	NaN	NaN	NaN	NaN	NaN	NaN	NaN	NaN	NaN	NaN	NaN	NaN
865	1.079	NaN	NaN	NaN	NaN	NaN	NaN	NaN	NaN	NaN	NaN	NaN	NaN	NaN	NaN	NaN	NaN	NaN	NaN	NaN	NaN	NaN	NaN	NaN	NaN
866	1.017	NaN	NaN	NaN	NaN	NaN	NaN	NaN	NaN	NaN	NaN	NaN	NaN	NaN	NaN	NaN	NaN	NaN	NaN	NaN	NaN	NaN	NaN	NaN	NaN
867	0.995	NaN	NaN	NaN	NaN	NaN	NaN	NaN	NaN	NaN	NaN	NaN	NaN	NaN	NaN	NaN	NaN	NaN	NaN	NaN	NaN	NaN	NaN	NaN	NaN
868	0.823	NaN	NaN	NaN	NaN	NaN	NaN	NaN	NaN	NaN	NaN	NaN	NaN	NaN	NaN	NaN	NaN	NaN	NaN	NaN	NaN	NaN	NaN	NaN	NaN
869	1.027	NaN	NaN	NaN	NaN	NaN	NaN	NaN	NaN	NaN	NaN	NaN	NaN	NaN	NaN	NaN	NaN	NaN	NaN	NaN	NaN	NaN	NaN	NaN	NaN
870	1.071	NaN	NaN	NaN	NaN	NaN	NaN	NaN	NaN	NaN	NaN	NaN	NaN	NaN	NaN	NaN	NaN	NaN	NaN	NaN	NaN	NaN	NaN	NaN	NaN
871	1	NaN	NaN	NaN	NaN	NaN	NaN	NaN	NaN	NaN	NaN	NaN	NaN	NaN	NaN	NaN	NaN	NaN	NaN	NaN	NaN	NaN	NaN	NaN	NaN
872	0.843	NaN	NaN	NaN	NaN	NaN	NaN	NaN	NaN	NaN	NaN	NaN	NaN	NaN	NaN	NaN	NaN	NaN	NaN	NaN	NaN	NaN	NaN	NaN	NaN
873	0.908	NaN	NaN	NaN	NaN	NaN	NaN	NaN	NaN	NaN	NaN	NaN	NaN	NaN	NaN	NaN	NaN	NaN	NaN	NaN	NaN	NaN	NaN	NaN	NaN
874	0.84	NaN	NaN	NaN	NaN	NaN	NaN	NaN	NaN	NaN	NaN	NaN	NaN	NaN	NaN	NaN	NaN	NaN	NaN	NaN	NaN	NaN	NaN	NaN	NaN
875	0.894	NaN	NaN	NaN	NaN	NaN	NaN	NaN	NaN	NaN	NaN	NaN	NaN	NaN	NaN	NaN	NaN	NaN	NaN	NaN	NaN	NaN	NaN	NaN	NaN
876	0.931	NaN	NaN	NaN	NaN	NaN	NaN	NaN	NaN	NaN	NaN	NaN	NaN	NaN	NaN	NaN	NaN	NaN	NaN	NaN	NaN	NaN	NaN	NaN	NaN
877	0.863	NaN	NaN	NaN	NaN	NaN	NaN	NaN	NaN	NaN	NaN	NaN	NaN	NaN	NaN	NaN	NaN	NaN	NaN	NaN	NaN	NaN	NaN	NaN	NaN
878	0.793	NaN	NaN	NaN	NaN	NaN	NaN	NaN	NaN	NaN	NaN	NaN	NaN	NaN	NaN	NaN	NaN	NaN	NaN	NaN	NaN	NaN	NaN	NaN	NaN
879	0.799	NaN	NaN	NaN	NaN	NaN	NaN	NaN	NaN	NaN	NaN	NaN	NaN	NaN	NaN	NaN	NaN	NaN	NaN	NaN	NaN	NaN	NaN	NaN	NaN
880	0.845	NaN	NaN	NaN	NaN	NaN	NaN	NaN	NaN	NaN	NaN	NaN	NaN	NaN	NaN	NaN	NaN	NaN	NaN	NaN	NaN	NaN	NaN	NaN	NaN
881	0.826	NaN	NaN	NaN	NaN	NaN	NaN	NaN	NaN	NaN	NaN	NaN	NaN	NaN	NaN	NaN	NaN	NaN	NaN	NaN	NaN	NaN	NaN	NaN	NaN
882	0.961	NaN	NaN	NaN	NaN	NaN	NaN	NaN	NaN	NaN	NaN	NaN	NaN	NaN	NaN	NaN	NaN	NaN	NaN	NaN	NaN	NaN	NaN	NaN	NaN
883	0.95	NaN	NaN	NaN	NaN	NaN	NaN	NaN	NaN	NaN	NaN	NaN	NaN	NaN	NaN	NaN	NaN	NaN	NaN	NaN	NaN	NaN	NaN	NaN	NaN
884	0.983	NaN	NaN	NaN	NaN	NaN	NaN	NaN	NaN	NaN	NaN	NaN	NaN	NaN	NaN	NaN	NaN	NaN	NaN	NaN	NaN	NaN	NaN	NaN	NaN
885	1.083	NaN	NaN	NaN	NaN	NaN	NaN	NaN	NaN	NaN	NaN	NaN	NaN	NaN	NaN	NaN	NaN	NaN	NaN	NaN	NaN	NaN	NaN	NaN	NaN
886	1.005	NaN	NaN	NaN	NaN	NaN	NaN	NaN	NaN	NaN	NaN	NaN	NaN	NaN	NaN	NaN	NaN	NaN	NaN	NaN	NaN	NaN	NaN	NaN	NaN
887	0.844	NaN	NaN	NaN	NaN	NaN	NaN	NaN	NaN	NaN	NaN	NaN	NaN	NaN	NaN	NaN	NaN	NaN	NaN	NaN	NaN	NaN	NaN	NaN	NaN
888	0.837	NaN	NaN	NaN	NaN	NaN	NaN	NaN	NaN	NaN	NaN	NaN	NaN	NaN	NaN	NaN	NaN	NaN	NaN	NaN	NaN	NaN	NaN	NaN	NaN
889	1.002	NaN	NaN	NaN	NaN	NaN	NaN	NaN	NaN	NaN	NaN	NaN	NaN	NaN	NaN	NaN	NaN	NaN	NaN	NaN	NaN	NaN	NaN	NaN	NaN
890	1.016	NaN	NaN	NaN	NaN	NaN	NaN	NaN	NaN	NaN	NaN	NaN	NaN	NaN	NaN	NaN	NaN	NaN	NaN	NaN	NaN	NaN	NaN	NaN	NaN
891	0.943	NaN	NaN	NaN	NaN	NaN	NaN	NaN	NaN	NaN	NaN	NaN	NaN	NaN	NaN	NaN	NaN	NaN	NaN	NaN	NaN	NaN	NaN	NaN	NaN
892	0.954	NaN	NaN	NaN	NaN	NaN	NaN	NaN	NaN	NaN	NaN	NaN	NaN	NaN	NaN	NaN	NaN	NaN	NaN	NaN	NaN	NaN	NaN	NaN	NaN
893	0.985	NaN	NaN	NaN	NaN	NaN	NaN	NaN	NaN	NaN	NaN	NaN	NaN	NaN	NaN	NaN	NaN	NaN	NaN	NaN	NaN	NaN	NaN	NaN	NaN
894	0.919	NaN	NaN	NaN	NaN	NaN	NaN	NaN	NaN	NaN	NaN	NaN	NaN	NaN	NaN	NaN	NaN	NaN	NaN	NaN	NaN	NaN	NaN	NaN	NaN
895	0.983	NaN	NaN	NaN	NaN	NaN	NaN	NaN	NaN	NaN	NaN	NaN	NaN	NaN	NaN	NaN	NaN	NaN	NaN	NaN	NaN	NaN	NaN	NaN	NaN
896	0.979	NaN	NaN	NaN	NaN	NaN	NaN	NaN	NaN	NaN	NaN	NaN	NaN	NaN	NaN	NaN	NaN	NaN	NaN	NaN	NaN	NaN	NaN	NaN	NaN
897	1.065	NaN	NaN	NaN	NaN	NaN	NaN	NaN	NaN	NaN	NaN	NaN	NaN	NaN	NaN	NaN	NaN	NaN	NaN	NaN	NaN	NaN	NaN	NaN	NaN
898	1.139	NaN	NaN	NaN	NaN	NaN	NaN	NaN	NaN	NaN	NaN	NaN	NaN	NaN	NaN	NaN	NaN	NaN	NaN	NaN	NaN	NaN	NaN	NaN	NaN
899	1.014	NaN	NaN	NaN	NaN	NaN	NaN	NaN	NaN	NaN	NaN	NaN	NaN	NaN	NaN	NaN	NaN	NaN	NaN	NaN	NaN	NaN	NaN	NaN	NaN
900	0.94	NaN	NaN	NaN	NaN	NaN	NaN	NaN	NaN	NaN	NaN	NaN	NaN	NaN	NaN	NaN	NaN	NaN	NaN	NaN	NaN	NaN	NaN	NaN	NaN
901	0.935	NaN	NaN	NaN	NaN	NaN	NaN	NaN	NaN	NaN	NaN	NaN	NaN	NaN	NaN	NaN	NaN	NaN	NaN	NaN	NaN	NaN	NaN	NaN	NaN
902	0.971	NaN	NaN	NaN	NaN	NaN	NaN	NaN	NaN	NaN	NaN	NaN	NaN	NaN	NaN	NaN	NaN	NaN	NaN	NaN	NaN	NaN	NaN	NaN	NaN
903	1.079	NaN	NaN	NaN	NaN	NaN	NaN	NaN	NaN	NaN	NaN	NaN	NaN	NaN	NaN	NaN	NaN	NaN	NaN	NaN	NaN	NaN	NaN	NaN	NaN
904	1.053	NaN	NaN	NaN	NaN	NaN	NaN	NaN	NaN	NaN	NaN	NaN	NaN	NaN	NaN	NaN	NaN	NaN	NaN	NaN	NaN	NaN	NaN	NaN	NaN
905	0.89	NaN	NaN	NaN	NaN	NaN	NaN	NaN	NaN	NaN	NaN	NaN	NaN	NaN	NaN	NaN	NaN	NaN	NaN	NaN	NaN	NaN	NaN	NaN	NaN
906	0.875	NaN	NaN	NaN	NaN	NaN	NaN	NaN	NaN	NaN	NaN	NaN	NaN	NaN	NaN	NaN	NaN	NaN	NaN	NaN	NaN	NaN	NaN	NaN	NaN
907	0.956	NaN	NaN	NaN	NaN	NaN	NaN	NaN	NaN	NaN	NaN	NaN	NaN	NaN	NaN	NaN	NaN	NaN	NaN	NaN	NaN	NaN	NaN	NaN	NaN
908	1.013	NaN	NaN	NaN	NaN	NaN	NaN	NaN	NaN	NaN	NaN	NaN	NaN	NaN	NaN	NaN	NaN	NaN	NaN	NaN	NaN	NaN	NaN	NaN	NaN
909	1.024	NaN	NaN	NaN	NaN	NaN	NaN	NaN	NaN	NaN	NaN	NaN	NaN	NaN	NaN	NaN	NaN	NaN	NaN	NaN	NaN	NaN	NaN	NaN	NaN
910	1.129	NaN	NaN	NaN	NaN	NaN	NaN	NaN	NaN	NaN	NaN	NaN	NaN	NaN	NaN	NaN	NaN	NaN	NaN	NaN	NaN	NaN	NaN	NaN	NaN
911	1.036	NaN	NaN	NaN	NaN	NaN	NaN	NaN	NaN	NaN	NaN	NaN	NaN	NaN	NaN	NaN	NaN	NaN	NaN	NaN	NaN	NaN	NaN	NaN	NaN
912	0.978	NaN	NaN	NaN	NaN	NaN	NaN	NaN	NaN	NaN	NaN	NaN	NaN	NaN	NaN	NaN	NaN	NaN	NaN	NaN	NaN	NaN	NaN	NaN	NaN
913	1.152	NaN	NaN	NaN	NaN	NaN	NaN	NaN	NaN	NaN	NaN	NaN	NaN	NaN	NaN	NaN	NaN	NaN	NaN	NaN	NaN	NaN	NaN	NaN	NaN
914	1.19	NaN	NaN	NaN	NaN	NaN	NaN	NaN	NaN	NaN	NaN	NaN	NaN	NaN	NaN	NaN	NaN	NaN	NaN	NaN	NaN	NaN	NaN	NaN	NaN
915	1.186	NaN	NaN	NaN	NaN	NaN	NaN	NaN	NaN	NaN	NaN	NaN	NaN	NaN	NaN	NaN	NaN	NaN	NaN	NaN	NaN	NaN	NaN	NaN	NaN
916	1.02	NaN	NaN	NaN	NaN	NaN	NaN	NaN	NaN	NaN	NaN	NaN	NaN	NaN	NaN	NaN	NaN	NaN	NaN	NaN	NaN	NaN	NaN	NaN	NaN
917	0.996	NaN	NaN	NaN	NaN	NaN	NaN	NaN	NaN	NaN	NaN	NaN	NaN	NaN	NaN	NaN	NaN	NaN	NaN	NaN	NaN	NaN	NaN	NaN	NaN
918	1.061	NaN	NaN	NaN	NaN	NaN	NaN	NaN	NaN	NaN	NaN	NaN	NaN	NaN	NaN	NaN	NaN	NaN	NaN	NaN	NaN	NaN	NaN	NaN	NaN
919	0.987	NaN	NaN	NaN	NaN	NaN	NaN	NaN	NaN	NaN	NaN	NaN	NaN	NaN	NaN	NaN	NaN	NaN	NaN	NaN	NaN	NaN	NaN	NaN	NaN
920	0.975	NaN	NaN	NaN	NaN	NaN	NaN	NaN	NaN	NaN	NaN	NaN	NaN	NaN	NaN	NaN	NaN	NaN	NaN	NaN	NaN	NaN	NaN	NaN	NaN
921	1.104	NaN	NaN	NaN	NaN	NaN	NaN	NaN	NaN	NaN	NaN	NaN	NaN	NaN	NaN	NaN	NaN	NaN	NaN	NaN	NaN	NaN	NaN	NaN	NaN
922	1.073	NaN	NaN	NaN	NaN	NaN	NaN	NaN	NaN	NaN	NaN	NaN	NaN	NaN	NaN	NaN	NaN	NaN	NaN	NaN	NaN	NaN	NaN	NaN	NaN
923	0.981	NaN	NaN	NaN	NaN	NaN	NaN	NaN	NaN	NaN	NaN	NaN	NaN	NaN	NaN	NaN	NaN	NaN	NaN	NaN	NaN	NaN	NaN	NaN	NaN
924	1.071	NaN	NaN	NaN	NaN	NaN	NaN	NaN	NaN	NaN	NaN	NaN	NaN	NaN	NaN	NaN	NaN	NaN	NaN	NaN	NaN	NaN	NaN	NaN	NaN
925	0.965	NaN	NaN	NaN	NaN	NaN	NaN	NaN	NaN	NaN	NaN	NaN	NaN	NaN	NaN	NaN	NaN	NaN	NaN	NaN	NaN	NaN	NaN	NaN	NaN
926	0.757	NaN	NaN	NaN	NaN	NaN	NaN	NaN	NaN	NaN	NaN	NaN	NaN	NaN	NaN	NaN	NaN	NaN	NaN	NaN	NaN	NaN	NaN	NaN	NaN
927	0.931	NaN	NaN	NaN	NaN	NaN	NaN	NaN	NaN	NaN	NaN	NaN	NaN	NaN	NaN	NaN	NaN	NaN	NaN	NaN	NaN	NaN	NaN	NaN	NaN
928	0.912	NaN	NaN	NaN	NaN	NaN	NaN	NaN	NaN	NaN	NaN	NaN	NaN	NaN	NaN	NaN	NaN	NaN	NaN	NaN	NaN	NaN	NaN	NaN	NaN
929	0.986	NaN	NaN	NaN	NaN	NaN	NaN	NaN	NaN	NaN	NaN	NaN	NaN	NaN	NaN	NaN	NaN	NaN	NaN	NaN	NaN	NaN	NaN	NaN	NaN
930	0.811	NaN	NaN	NaN	NaN	NaN	NaN	NaN	NaN	NaN	NaN	NaN	NaN	NaN	NaN	NaN	NaN	NaN	NaN	NaN	NaN	NaN	NaN	NaN	NaN
931	0.982	NaN	NaN	NaN	NaN	NaN	NaN	NaN	NaN	NaN	NaN	NaN	NaN	NaN	NaN	NaN	NaN	NaN	NaN	NaN	NaN	NaN	NaN	NaN	NaN
932	0.927	NaN	NaN	NaN	NaN	NaN	NaN	NaN	NaN	NaN	NaN	NaN	NaN	NaN	NaN	NaN	NaN	NaN	NaN	NaN	NaN	NaN	NaN	NaN	NaN
933	0.732	NaN	NaN	NaN	NaN	NaN	NaN	NaN	NaN	NaN	NaN	NaN	NaN	NaN	NaN	NaN	NaN	NaN	NaN	NaN	NaN	NaN	NaN	NaN	NaN
934	0.78	NaN	NaN	NaN	NaN	NaN	NaN	NaN	NaN	NaN	NaN	NaN	NaN	NaN	NaN	NaN	NaN	NaN	NaN	NaN	NaN	NaN	NaN	NaN	NaN
935	0.778	NaN	NaN	NaN	NaN	NaN	NaN	NaN	NaN	NaN	NaN	NaN	NaN	NaN	NaN	NaN	NaN	NaN	NaN	NaN	NaN	NaN	NaN	NaN	NaN
936	0.879	NaN	NaN	NaN	NaN	NaN	NaN	NaN	NaN	NaN	NaN	NaN	NaN	NaN	NaN	NaN	NaN	NaN	NaN	NaN	NaN	NaN	NaN	NaN	NaN
937	0.869	NaN	NaN	NaN	NaN	NaN	NaN	NaN	NaN	NaN	NaN	NaN	NaN	NaN	NaN	NaN	NaN	NaN	NaN	NaN	NaN	NaN	NaN	NaN	NaN
938	0.742	NaN	NaN	NaN	NaN	NaN	NaN	NaN	NaN	NaN	NaN	NaN	NaN	NaN	NaN	NaN	NaN	NaN	NaN	NaN	NaN	NaN	NaN	NaN	NaN
939	0.624	NaN	NaN	NaN	NaN	NaN	NaN	NaN	NaN	NaN	NaN	NaN	NaN	NaN	NaN	NaN	NaN	NaN	NaN	NaN	NaN	NaN	NaN	NaN	NaN
940	0.724	NaN	NaN	NaN	NaN	NaN	NaN	NaN	NaN	NaN	NaN	NaN	NaN	NaN	NaN	NaN	NaN	NaN	NaN	NaN	NaN	NaN	NaN	NaN	NaN
941	0.834	NaN	NaN	NaN	NaN	NaN	NaN	NaN	NaN	NaN	NaN	NaN	NaN	NaN	NaN	NaN	NaN	NaN	NaN	NaN	NaN	NaN	NaN	NaN	NaN
942	0.813	NaN	NaN	NaN	NaN	NaN	NaN	NaN	NaN	NaN	NaN	NaN	NaN	NaN	NaN	NaN	NaN	NaN	NaN	NaN	NaN	NaN	NaN	NaN	NaN
943	0.687	NaN	NaN	NaN	NaN	NaN	NaN	NaN	NaN	NaN	NaN	NaN	NaN	NaN	NaN	NaN	NaN	NaN	NaN	NaN	NaN	NaN	NaN	NaN	NaN
944	0.708	NaN	NaN	NaN	NaN	NaN	NaN	NaN	NaN	NaN	NaN	NaN	NaN	NaN	NaN	NaN	NaN	NaN	NaN	NaN	NaN	NaN	NaN	NaN	NaN
945	0.838	NaN	NaN	NaN	NaN	NaN	NaN	NaN	NaN	NaN	NaN	NaN	NaN	NaN	NaN	NaN	NaN	NaN	NaN	NaN	NaN	NaN	NaN	NaN	NaN
946	0.877	NaN	NaN	NaN	NaN	NaN	NaN	NaN	NaN	NaN	NaN	NaN	NaN	NaN	NaN	NaN	NaN	NaN	NaN	NaN	NaN	NaN	NaN	NaN	NaN
947	0.959	NaN	NaN	NaN	NaN	NaN	NaN	NaN	NaN	NaN	NaN	NaN	NaN	NaN	NaN	NaN	NaN	NaN	NaN	NaN	NaN	NaN	NaN	NaN	NaN
948	1.024	NaN	NaN	NaN	NaN	NaN	NaN	NaN	NaN	NaN	NaN	NaN	NaN	NaN	NaN	NaN	NaN	NaN	NaN	NaN	NaN	NaN	NaN	NaN	NaN
949	1.071	NaN	NaN	NaN	NaN	NaN	NaN	NaN	NaN	NaN	NaN	NaN	NaN	NaN	NaN	NaN	NaN	NaN	NaN	NaN	NaN	NaN	NaN	NaN	NaN
950	1.01	NaN	NaN	NaN	NaN	NaN	NaN	NaN	NaN	NaN	NaN	NaN	NaN	NaN	NaN	NaN	NaN	NaN	NaN	NaN	NaN	NaN	NaN	NaN	NaN
951	0.931	NaN	NaN	NaN	NaN	NaN	NaN	NaN	NaN	NaN	NaN	NaN	NaN	NaN	NaN	NaN	NaN	NaN	NaN	NaN	NaN	NaN	NaN	NaN	NaN
952	0.943	NaN	NaN	NaN	NaN	NaN	NaN	NaN	NaN	NaN	NaN	NaN	NaN	NaN	NaN	NaN	NaN	NaN	NaN	NaN	NaN	NaN	NaN	NaN	NaN
953	1.065	NaN	NaN	NaN	NaN	NaN	NaN	NaN	NaN	NaN	NaN	NaN	NaN	NaN	NaN	NaN	NaN	NaN	NaN	NaN	NaN	NaN	NaN	NaN	NaN
954	1.142	NaN	NaN	NaN	NaN	NaN	NaN	NaN	NaN	NaN	NaN	NaN	NaN	NaN	NaN	NaN	NaN	NaN	NaN	NaN	NaN	NaN	NaN	NaN	NaN
955	1.089	NaN	NaN	NaN	NaN	NaN	NaN	NaN	NaN	NaN	NaN	NaN	NaN	NaN	NaN	NaN	NaN	NaN	NaN	NaN	NaN	NaN	NaN	NaN	NaN
956	1.062	NaN	NaN	NaN	NaN	NaN	NaN	NaN	NaN	NaN	NaN	NaN	NaN	NaN	NaN	NaN	NaN	NaN	NaN	NaN	NaN	NaN	NaN	NaN	NaN
957	1.107	NaN	NaN	NaN	NaN	NaN	NaN	NaN	NaN	NaN	NaN	NaN	NaN	NaN	NaN	NaN	NaN	NaN	NaN	NaN	NaN	NaN	NaN	NaN	NaN
958	1.048	NaN	NaN	NaN	NaN	NaN	NaN	NaN	NaN	NaN	NaN	NaN	NaN	NaN	NaN	NaN	NaN	NaN	NaN	NaN	NaN	NaN	NaN	NaN	NaN
959	1.041	NaN	NaN	NaN	NaN	NaN	NaN	NaN	NaN	NaN	NaN	NaN	NaN	NaN	NaN	NaN	NaN	NaN	NaN	NaN	NaN	NaN	NaN	NaN	NaN
960	1.145	NaN	NaN	NaN	NaN	NaN	NaN	NaN	NaN	NaN	NaN	NaN	NaN	NaN	NaN	NaN	NaN	NaN	NaN	NaN	NaN	NaN	NaN	NaN	NaN
961	1.107	NaN	NaN	NaN	NaN	NaN	NaN	NaN	NaN	NaN	NaN	NaN	NaN	NaN	NaN	NaN	NaN	NaN	NaN	NaN	NaN	NaN	NaN	NaN	NaN
962	1.068	NaN	NaN	NaN	NaN	NaN	NaN	NaN	NaN	NaN	NaN	NaN	NaN	NaN	NaN	NaN	NaN	NaN	NaN	NaN	NaN	NaN	NaN	NaN	NaN
963	0.973	NaN	NaN	NaN	NaN	NaN	NaN	NaN	NaN	NaN	NaN	NaN	NaN	NaN	NaN	NaN	NaN	NaN	NaN	NaN	NaN	NaN	NaN	NaN	NaN
964	0.915	NaN	NaN	NaN	NaN	NaN	NaN	NaN	NaN	NaN	NaN	NaN	NaN	NaN	NaN	NaN	NaN	NaN	NaN	NaN	NaN	NaN	NaN	NaN	NaN
965	0.981	NaN	NaN	NaN	NaN	NaN	NaN	NaN	NaN	NaN	NaN	NaN	NaN	NaN	NaN	NaN	NaN	NaN	NaN	NaN	NaN	NaN	NaN	NaN	NaN
966	0.949	NaN	NaN	NaN	NaN	NaN	NaN	NaN	NaN	NaN	NaN	NaN	NaN	NaN	NaN	NaN	NaN	NaN	NaN	NaN	NaN	NaN	NaN	NaN	NaN
967	0.847	NaN	NaN	NaN	NaN	NaN	NaN	NaN	NaN	NaN	NaN	NaN	NaN	NaN	NaN	NaN	NaN	NaN	NaN	NaN	NaN	NaN	NaN	NaN	NaN
968	1.078	NaN	NaN	NaN	NaN	NaN	NaN	NaN	NaN	NaN	NaN	NaN	NaN	NaN	NaN	NaN	NaN	NaN	NaN	NaN	NaN	NaN	NaN	NaN	NaN
969	1.094	NaN	NaN	NaN	NaN	NaN	NaN	NaN	NaN	NaN	NaN	NaN	NaN	NaN	NaN	NaN	NaN	NaN	NaN	NaN	NaN	NaN	NaN	NaN	NaN
970	1.133	NaN	NaN	NaN	NaN	NaN	NaN	NaN	NaN	NaN	NaN	NaN	NaN	NaN	NaN	NaN	NaN	NaN	NaN	NaN	NaN	NaN	NaN	NaN	NaN
971	1.018	NaN	NaN	NaN	NaN	NaN	NaN	NaN	NaN	NaN	NaN	NaN	NaN	NaN	NaN	NaN	NaN	NaN	NaN	NaN	NaN	NaN	NaN	NaN	NaN
972	1.101	NaN	NaN	NaN	NaN	NaN	NaN	NaN	NaN	NaN	NaN	NaN	NaN	NaN	NaN	NaN	NaN	NaN	NaN	NaN	NaN	NaN	NaN	NaN	NaN
973	1.032	NaN	NaN	NaN	NaN	NaN	NaN	NaN	NaN	NaN	NaN	NaN	NaN	NaN	NaN	NaN	NaN	NaN	NaN	NaN	NaN	NaN	NaN	NaN	NaN
974	1.086	NaN	NaN	NaN	NaN	NaN	NaN	NaN	NaN	NaN	NaN	NaN	NaN	NaN	NaN	NaN	NaN	NaN	NaN	NaN	NaN	NaN	NaN	NaN	NaN
975	1.001	NaN	NaN	NaN	NaN	NaN	NaN	NaN	NaN	NaN	NaN	NaN	NaN	NaN	NaN	NaN	NaN	NaN	NaN	NaN	NaN	NaN	NaN	NaN	NaN
976	0.928	NaN	NaN	NaN	NaN	NaN	NaN	NaN	NaN	NaN	NaN	NaN	NaN	NaN	NaN	NaN	NaN	NaN	NaN	NaN	NaN	NaN	NaN	NaN	NaN
977	0.96	NaN	NaN	NaN	NaN	NaN	NaN	NaN	NaN	NaN	NaN	NaN	NaN	NaN	NaN	NaN	NaN	NaN	NaN	NaN	NaN	NaN	NaN	NaN	NaN
978	1.049	NaN	NaN	NaN	NaN	NaN	NaN	NaN	NaN	NaN	NaN	NaN	NaN	NaN	NaN	NaN	NaN	NaN	NaN	NaN	NaN	NaN	NaN	NaN	NaN
979	1.079	NaN	NaN	NaN	NaN	NaN	NaN	NaN	NaN	NaN	NaN	NaN	NaN	NaN	NaN	NaN	NaN	NaN	NaN	NaN	NaN	NaN	NaN	NaN	NaN
980	1.027	NaN	NaN	NaN	NaN	NaN	NaN	NaN	NaN	NaN	NaN	NaN	NaN	NaN	NaN	NaN	NaN	NaN	NaN	NaN	NaN	NaN	NaN	NaN	NaN
981	0.965	NaN	NaN	NaN	NaN	NaN	NaN	NaN	NaN	NaN	NaN	NaN	NaN	NaN	NaN	NaN	NaN	NaN	NaN	NaN	NaN	NaN	NaN	NaN	NaN
982	1.055	NaN	NaN	NaN	NaN	NaN	NaN	NaN	NaN	NaN	NaN	NaN	NaN	NaN	NaN	NaN	NaN	NaN	NaN	NaN	NaN	NaN	NaN	NaN	NaN
983	0.824	NaN	NaN	NaN	NaN	NaN	NaN	NaN	NaN	NaN	NaN	NaN	NaN	NaN	NaN	NaN	NaN	NaN	NaN	NaN	NaN	NaN	NaN	NaN	NaN
984	0.907	NaN	NaN	NaN	NaN	NaN	NaN	NaN	NaN	NaN	NaN	NaN	NaN	NaN	NaN	NaN	NaN	NaN	NaN	NaN	NaN	NaN	NaN	NaN	NaN
985	0.958	NaN	NaN	NaN	NaN	NaN	NaN	NaN	NaN	NaN	NaN	NaN	NaN	NaN	NaN	NaN	NaN	NaN	NaN	NaN	NaN	NaN	NaN	NaN	NaN
986	0.954	NaN	NaN	NaN	NaN	NaN	NaN	NaN	NaN	NaN	NaN	NaN	NaN	NaN	NaN	NaN	NaN	NaN	NaN	NaN	NaN	NaN	NaN	NaN	NaN
987	1.076	NaN	NaN	NaN	NaN	NaN	NaN	NaN	NaN	NaN	NaN	NaN	NaN	NaN	NaN	NaN	NaN	NaN	NaN	NaN	NaN	NaN	NaN	NaN	NaN
988	1.088	NaN	NaN	NaN	NaN	NaN	NaN	NaN	NaN	NaN	NaN	NaN	NaN	NaN	NaN	NaN	NaN	NaN	NaN	NaN	NaN	NaN	NaN	NaN	NaN
989	1.05	NaN	NaN	NaN	NaN	NaN	NaN	NaN	NaN	NaN	NaN	NaN	NaN	NaN	NaN	NaN	NaN	NaN	NaN	NaN	NaN	NaN	NaN	NaN	NaN
990	1.042	NaN	NaN	NaN	NaN	NaN	NaN	NaN	NaN	NaN	NaN	NaN	NaN	NaN	NaN	NaN	NaN	NaN	NaN	NaN	NaN	NaN	NaN	NaN	NaN
991	1.128	NaN	NaN	NaN	NaN	NaN	NaN	NaN	NaN	NaN	NaN	NaN	NaN	NaN	NaN	NaN	NaN	NaN	NaN	NaN	NaN	NaN	NaN	NaN	NaN
992	1.038	NaN	NaN	NaN	NaN	NaN	NaN	NaN	NaN	NaN	NaN	NaN	NaN	NaN	NaN	NaN	NaN	NaN	NaN	NaN	NaN	NaN	NaN	NaN	NaN
993	1.01	NaN	NaN	NaN	NaN	NaN	NaN	NaN	NaN	NaN	NaN	NaN	NaN	NaN	NaN	NaN	NaN	NaN	NaN	NaN	NaN	NaN	NaN	NaN	NaN
994	1.108	NaN	NaN	NaN	NaN	NaN	NaN	NaN	NaN	NaN	NaN	NaN	NaN	NaN	NaN	NaN	NaN	NaN	NaN	NaN	NaN	NaN	NaN	NaN	NaN
995	1.188	NaN	NaN	NaN	NaN	NaN	NaN	NaN	NaN	NaN	NaN	NaN	NaN	NaN	NaN	NaN	NaN	NaN	NaN	NaN	NaN	NaN	NaN	NaN	NaN
996	0.991	NaN	NaN	NaN	NaN	NaN	NaN	NaN	NaN	NaN	NaN	NaN	NaN	NaN	NaN	NaN	NaN	NaN	NaN	NaN	NaN	NaN	NaN	NaN	NaN
997	1.105	NaN	NaN	NaN	NaN	NaN	NaN	NaN	NaN	NaN	NaN	NaN	NaN	NaN	NaN	NaN	NaN	NaN	NaN	NaN	NaN	NaN	NaN	NaN	NaN
998	1.023	NaN	NaN	NaN	NaN	NaN	NaN	NaN	NaN	NaN	NaN	NaN	NaN	NaN	NaN	NaN	NaN	NaN	NaN	NaN	NaN	NaN	NaN	NaN	NaN
999	1.064	NaN	NaN	NaN	NaN	NaN	NaN	NaN	NaN	NaN	NaN	NaN	NaN	NaN	NaN	NaN	NaN	NaN	NaN	NaN	NaN	NaN	NaN	NaN	NaN
1000	0.998	NaN	NaN	NaN	NaN	NaN	NaN	NaN	NaN	NaN	NaN	NaN	NaN	NaN	NaN	NaN	NaN	NaN	NaN	NaN	NaN	NaN	NaN	NaN	NaN
1001	0.968	NaN	NaN	NaN	NaN	NaN	NaN	NaN	NaN	NaN	NaN	NaN	NaN	NaN	NaN	NaN	NaN	NaN	NaN	NaN	NaN	NaN	NaN	NaN	NaN
1002	1.058	NaN	NaN	NaN	NaN	NaN	NaN	NaN	NaN	NaN	NaN	NaN	NaN	NaN	NaN	NaN	NaN	NaN	NaN	NaN	NaN	NaN	NaN	NaN	NaN
1003	0.942	NaN	NaN	NaN	NaN	NaN	NaN	NaN	NaN	NaN	NaN	NaN	NaN	NaN	NaN	NaN	NaN	NaN	NaN	NaN	NaN	NaN	NaN	NaN	NaN
1004	0.927	NaN	NaN	NaN	NaN	NaN	NaN	NaN	NaN	NaN	NaN	NaN	NaN	NaN	NaN	NaN	NaN	NaN	NaN	NaN	NaN	NaN	NaN	NaN	NaN
1005	0.935	NaN	NaN	NaN	NaN	NaN	NaN	NaN	NaN	NaN	NaN	NaN	NaN	NaN	NaN	NaN	NaN	NaN	NaN	NaN	NaN	NaN	NaN	NaN	NaN
1006	0.879	NaN	NaN	NaN	NaN	NaN	NaN	NaN	NaN	NaN	NaN	NaN	NaN	NaN	NaN	NaN	NaN	NaN	NaN	NaN	NaN	NaN	NaN	NaN	NaN
1007	1.018	NaN	NaN	NaN	NaN	NaN	NaN	NaN	NaN	NaN	NaN	NaN	NaN	NaN	NaN	NaN	NaN	NaN	NaN	NaN	NaN	NaN	NaN	NaN	NaN
1008	1.044	NaN	NaN	NaN	NaN	NaN	NaN	NaN	NaN	NaN	NaN	NaN	NaN	NaN	NaN	NaN	NaN	NaN	NaN	NaN	NaN	NaN	NaN	NaN	NaN
1009	0.981	NaN	NaN	NaN	NaN	NaN	NaN	NaN	NaN	NaN	NaN	NaN	NaN	NaN	NaN	NaN	NaN	NaN	NaN	NaN	NaN	NaN	NaN	NaN	NaN
1010	1.029	NaN	NaN	NaN	NaN	NaN	NaN	NaN	NaN	NaN	NaN	NaN	NaN	NaN	NaN	NaN	NaN	NaN	NaN	NaN	NaN	NaN	NaN	NaN	NaN
1011	0.872	NaN	NaN	NaN	NaN	NaN	NaN	NaN	NaN	NaN	NaN	NaN	NaN	NaN	NaN	NaN	NaN	NaN	NaN	NaN	NaN	NaN	NaN	NaN	NaN
1012	1.032	NaN	NaN	NaN	NaN	NaN	NaN	NaN	NaN	NaN	NaN	NaN	NaN	NaN	NaN	NaN	NaN	NaN	NaN	NaN	NaN	NaN	NaN	NaN	NaN
1013	1.055	NaN	NaN	NaN	NaN	NaN	NaN	NaN	NaN	NaN	NaN	NaN	NaN	NaN	NaN	NaN	NaN	NaN	NaN	NaN	NaN	NaN	NaN	NaN	NaN
1014	1.105	NaN	NaN	NaN	NaN	NaN	NaN	NaN	NaN	NaN	NaN	NaN	NaN	NaN	NaN	NaN	NaN	NaN	NaN	NaN	NaN	NaN	NaN	NaN	NaN
1015	0.986	NaN	NaN	NaN	NaN	NaN	NaN	NaN	NaN	NaN	NaN	NaN	NaN	NaN	NaN	NaN	NaN	NaN	NaN	NaN	NaN	NaN	NaN	NaN	NaN
1016	1.073	NaN	NaN	NaN	NaN	NaN	NaN	NaN	NaN	NaN	NaN	NaN	NaN	NaN	NaN	NaN	NaN	NaN	NaN	NaN	NaN	NaN	NaN	NaN	NaN
1017	1.157	NaN	NaN	NaN	NaN	NaN	NaN	NaN	NaN	NaN	NaN	NaN	NaN	NaN	NaN	NaN	NaN	NaN	NaN	NaN	NaN	NaN	NaN	NaN	NaN
1018	1.04	NaN	NaN	NaN	NaN	NaN	NaN	NaN	NaN	NaN	NaN	NaN	NaN	NaN	NaN	NaN	NaN	NaN	NaN	NaN	NaN	NaN	NaN	NaN	NaN
1019	1.07	NaN	NaN	NaN	NaN	NaN	NaN	NaN	NaN	NaN	NaN	NaN	NaN	NaN	NaN	NaN	NaN	NaN	NaN	NaN	NaN	NaN	NaN	NaN	NaN
1020	1.043	NaN	NaN	NaN	NaN	NaN	NaN	NaN	NaN	NaN	NaN	NaN	NaN	NaN	NaN	NaN	NaN	NaN	NaN	NaN	NaN	NaN	NaN	NaN	NaN
1021	1.122	NaN	NaN	NaN	NaN	NaN	NaN	NaN	NaN	NaN	NaN	NaN	NaN	NaN	NaN	NaN	NaN	NaN	NaN	NaN	NaN	NaN	NaN	NaN	NaN
1022	1.162	NaN	NaN	NaN	NaN	NaN	NaN	NaN	NaN	NaN	NaN	NaN	NaN	NaN	NaN	NaN	NaN	NaN	NaN	NaN	NaN	NaN	NaN	NaN	NaN
1023	0.98	NaN	NaN	NaN	NaN	NaN	NaN	NaN	NaN	NaN	NaN	NaN	NaN	NaN	NaN	NaN	NaN	NaN	NaN	NaN	NaN	NaN	NaN	NaN	NaN
1024	1.039	NaN	NaN	NaN	NaN	NaN	NaN	NaN	NaN	NaN	NaN	NaN	NaN	NaN	NaN	NaN	NaN	NaN	NaN	NaN	NaN	NaN	NaN	NaN	NaN
1025	0.954	NaN	NaN	NaN	NaN	NaN	NaN	NaN	NaN	NaN	NaN	NaN	NaN	NaN	NaN	NaN	NaN	NaN	NaN	NaN	NaN	NaN	NaN	NaN	NaN
1026	1.074	NaN	NaN	NaN	NaN	NaN	NaN	NaN	NaN	NaN	NaN	NaN	NaN	NaN	NaN	NaN	NaN	NaN	NaN	NaN	NaN	NaN	NaN	NaN	NaN
1027	1.038	NaN	NaN	NaN	NaN	NaN	NaN	NaN	NaN	NaN	NaN	NaN	NaN	NaN	NaN	NaN	NaN	NaN	NaN	NaN	NaN	NaN	NaN	NaN	NaN
1028	1.065	NaN	NaN	NaN	NaN	NaN	NaN	NaN	NaN	NaN	NaN	NaN	NaN	NaN	NaN	NaN	NaN	NaN	NaN	NaN	NaN	NaN	NaN	NaN	NaN
1029	0.977	NaN	NaN	NaN	NaN	NaN	NaN	NaN	NaN	NaN	NaN	NaN	NaN	NaN	NaN	NaN	NaN	NaN	NaN	NaN	NaN	NaN	NaN	NaN	NaN
1030	1.006	NaN	NaN	NaN	NaN	NaN	NaN	NaN	NaN	NaN	NaN	NaN	NaN	NaN	NaN	NaN	NaN	NaN	NaN	NaN	NaN	NaN	NaN	NaN	NaN
1031	0.972	NaN	NaN	NaN	NaN	NaN	NaN	NaN	NaN	NaN	NaN	NaN	NaN	NaN	NaN	NaN	NaN	NaN	NaN	NaN	NaN	NaN	NaN	NaN	NaN
1032	0.769	NaN	NaN	NaN	NaN	NaN	NaN	NaN	NaN	NaN	NaN	NaN	NaN	NaN	NaN	NaN	NaN	NaN	NaN	NaN	NaN	NaN	NaN	NaN	NaN
1033	0.936	NaN	NaN	NaN	NaN	NaN	NaN	NaN	NaN	NaN	NaN	NaN	NaN	NaN	NaN	NaN	NaN	NaN	NaN	NaN	NaN	NaN	NaN	NaN	NaN
1034	0.92	NaN	NaN	NaN	NaN	NaN	NaN	NaN	NaN	NaN	NaN	NaN	NaN	NaN	NaN	NaN	NaN	NaN	NaN	NaN	NaN	NaN	NaN	NaN	NaN
1035	0.941	NaN	NaN	NaN	NaN	NaN	NaN	NaN	NaN	NaN	NaN	NaN	NaN	NaN	NaN	NaN	NaN	NaN	NaN	NaN	NaN	NaN	NaN	NaN	NaN
1036	0.913	NaN	NaN	NaN	NaN	NaN	NaN	NaN	NaN	NaN	NaN	NaN	NaN	NaN	NaN	NaN	NaN	NaN	NaN	NaN	NaN	NaN	NaN	NaN	NaN
1037	0.89	NaN	NaN	NaN	NaN	NaN	NaN	NaN	NaN	NaN	NaN	NaN	NaN	NaN	NaN	NaN	NaN	NaN	NaN	NaN	NaN	NaN	NaN	NaN	NaN
1038	0.875	NaN	NaN	NaN	NaN	NaN	NaN	NaN	NaN	NaN	NaN	NaN	NaN	NaN	NaN	NaN	NaN	NaN	NaN	NaN	NaN	NaN	NaN	NaN	NaN
1039	0.992	NaN	NaN	NaN	NaN	NaN	NaN	NaN	NaN	NaN	NaN	NaN	NaN	NaN	NaN	NaN	NaN	NaN	NaN	NaN	NaN	NaN	NaN	NaN	NaN
1040	0.952	NaN	NaN	NaN	NaN	NaN	NaN	NaN	NaN	NaN	NaN	NaN	NaN	NaN	NaN	NaN	NaN	NaN	NaN	NaN	NaN	NaN	NaN	NaN	NaN
1041	1.054	NaN	NaN	NaN	NaN	NaN	NaN	NaN	NaN	NaN	NaN	NaN	NaN	NaN	NaN	NaN	NaN	NaN	NaN	NaN	NaN	NaN	NaN	NaN	NaN
1042	1.126	NaN	NaN	NaN	NaN	NaN	NaN	NaN	NaN	NaN	NaN	NaN	NaN	NaN	NaN	NaN	NaN	NaN	NaN	NaN	NaN	NaN	NaN	NaN	NaN
1043	1.092	NaN	NaN	NaN	NaN	NaN	NaN	NaN	NaN	NaN	NaN	NaN	NaN	NaN	NaN	NaN	NaN	NaN	NaN	NaN	NaN	NaN	NaN	NaN	NaN
1044	1.067	NaN	NaN	NaN	NaN	NaN	NaN	NaN	NaN	NaN	NaN	NaN	NaN	NaN	NaN	NaN	NaN	NaN	NaN	NaN	NaN	NaN	NaN	NaN	NaN
1045	1.146	NaN	NaN	NaN	NaN	NaN	NaN	NaN	NaN	NaN	NaN	NaN	NaN	NaN	NaN	NaN	NaN	NaN	NaN	NaN	NaN	NaN	NaN	NaN	NaN
1046	1.054	NaN	NaN	NaN	NaN	NaN	NaN	NaN	NaN	NaN	NaN	NaN	NaN	NaN	NaN	NaN	NaN	NaN	NaN	NaN	NaN	NaN	NaN	NaN	NaN
1047	1.06	NaN	NaN	NaN	NaN	NaN	NaN	NaN	NaN	NaN	NaN	NaN	NaN	NaN	NaN	NaN	NaN	NaN	NaN	NaN	NaN	NaN	NaN	NaN	NaN
1048	0.958	NaN	NaN	NaN	NaN	NaN	NaN	NaN	NaN	NaN	NaN	NaN	NaN	NaN	NaN	NaN	NaN	NaN	NaN	NaN	NaN	NaN	NaN	NaN	NaN
1049	0.81	NaN	NaN	NaN	NaN	NaN	NaN	NaN	NaN	NaN	NaN	NaN	NaN	NaN	NaN	NaN	NaN	NaN	NaN	NaN	NaN	NaN	NaN	NaN	NaN
1050	0.584	NaN	NaN	NaN	NaN	NaN	NaN	NaN	NaN	NaN	NaN	NaN	NaN	NaN	NaN	NaN	NaN	NaN	NaN	NaN	NaN	NaN	NaN	NaN	NaN
1051	0.639	NaN	NaN	NaN	NaN	NaN	NaN	NaN	NaN	NaN	NaN	NaN	NaN	NaN	NaN	NaN	NaN	NaN	NaN	NaN	NaN	NaN	NaN	NaN	NaN
1052	0.755	NaN	NaN	NaN	NaN	NaN	NaN	NaN	NaN	NaN	NaN	NaN	NaN	NaN	NaN	NaN	NaN	NaN	NaN	NaN	NaN	NaN	NaN	NaN	NaN
1053	0.794	NaN	NaN	NaN	NaN	NaN	NaN	NaN	NaN	NaN	NaN	NaN	NaN	NaN	NaN	NaN	NaN	NaN	NaN	NaN	NaN	NaN	NaN	NaN	NaN
1054	0.803	NaN	NaN	NaN	NaN	NaN	NaN	NaN	NaN	NaN	NaN	NaN	NaN	NaN	NaN	NaN	NaN	NaN	NaN	NaN	NaN	NaN	NaN	NaN	NaN
1055	0.836	NaN	NaN	NaN	NaN	NaN	NaN	NaN	NaN	NaN	NaN	NaN	NaN	NaN	NaN	NaN	NaN	NaN	NaN	NaN	NaN	NaN	NaN	NaN	NaN
1056	0.937	NaN	NaN	NaN	NaN	NaN	NaN	NaN	NaN	NaN	NaN	NaN	NaN	NaN	NaN	NaN	NaN	NaN	NaN	NaN	NaN	NaN	NaN	NaN	NaN
1057	0.91	NaN	NaN	NaN	NaN	NaN	NaN	NaN	NaN	NaN	NaN	NaN	NaN	NaN	NaN	NaN	NaN	NaN	NaN	NaN	NaN	NaN	NaN	NaN	NaN
1058	1.023	NaN	NaN	NaN	NaN	NaN	NaN	NaN	NaN	NaN	NaN	NaN	NaN	NaN	NaN	NaN	NaN	NaN	NaN	NaN	NaN	NaN	NaN	NaN	NaN
1059	1.054	NaN	NaN	NaN	NaN	NaN	NaN	NaN	NaN	NaN	NaN	NaN	NaN	NaN	NaN	NaN	NaN	NaN	NaN	NaN	NaN	NaN	NaN	NaN	NaN
1060	1.09	NaN	NaN	NaN	NaN	NaN	NaN	NaN	NaN	NaN	NaN	NaN	NaN	NaN	NaN	NaN	NaN	NaN	NaN	NaN	NaN	NaN	NaN	NaN	NaN
1061	1.176	NaN	NaN	NaN	NaN	NaN	NaN	NaN	NaN	NaN	NaN	NaN	NaN	NaN	NaN	NaN	NaN	NaN	NaN	NaN	NaN	NaN	NaN	NaN	NaN
1062	1.218	NaN	NaN	NaN	NaN	NaN	NaN	NaN	NaN	NaN	NaN	NaN	NaN	NaN	NaN	NaN	NaN	NaN	NaN	NaN	NaN	NaN	NaN	NaN	NaN
1063	1.248	NaN	NaN	NaN	NaN	NaN	NaN	NaN	NaN	NaN	NaN	NaN	NaN	NaN	NaN	NaN	NaN	NaN	NaN	NaN	NaN	NaN	NaN	NaN	NaN
1064	1.151	NaN	NaN	NaN	NaN	NaN	NaN	NaN	NaN	NaN	NaN	NaN	NaN	NaN	NaN	NaN	NaN	NaN	NaN	NaN	NaN	NaN	NaN	NaN	NaN
1065	1.039	NaN	NaN	NaN	NaN	NaN	NaN	NaN	NaN	NaN	NaN	NaN	NaN	NaN	NaN	NaN	NaN	NaN	NaN	NaN	NaN	NaN	NaN	NaN	NaN
1066	1.108	NaN	NaN	NaN	NaN	NaN	NaN	NaN	NaN	NaN	NaN	NaN	NaN	NaN	NaN	NaN	NaN	NaN	NaN	NaN	NaN	NaN	NaN	NaN	NaN
1067	1.052	NaN	NaN	NaN	NaN	NaN	NaN	NaN	NaN	NaN	NaN	NaN	NaN	NaN	NaN	NaN	NaN	NaN	NaN	NaN	NaN	NaN	NaN	NaN	NaN
1068	1.109	NaN	NaN	NaN	NaN	NaN	NaN	NaN	NaN	NaN	NaN	NaN	NaN	NaN	NaN	NaN	NaN	NaN	NaN	NaN	NaN	NaN	NaN	NaN	NaN
1069	1.106	NaN	NaN	NaN	NaN	NaN	NaN	NaN	NaN	NaN	NaN	NaN	NaN	NaN	NaN	NaN	NaN	NaN	NaN	NaN	NaN	NaN	NaN	NaN	NaN
1070	1.011	NaN	NaN	NaN	NaN	NaN	NaN	NaN	NaN	NaN	NaN	NaN	NaN	NaN	NaN	NaN	NaN	NaN	NaN	NaN	NaN	NaN	NaN	NaN	NaN
1071	1.042	NaN	NaN	NaN	NaN	NaN	NaN	NaN	NaN	NaN	NaN	NaN	NaN	NaN	NaN	NaN	NaN	NaN	NaN	NaN	NaN	NaN	NaN	NaN	NaN
1072	1.092	NaN	NaN	NaN	NaN	NaN	NaN	NaN	NaN	NaN	NaN	NaN	NaN	NaN	NaN	NaN	NaN	NaN	NaN	NaN	NaN	NaN	NaN	NaN	NaN
1073	0.948	NaN	NaN	NaN	NaN	NaN	NaN	NaN	NaN	NaN	NaN	NaN	NaN	NaN	NaN	NaN	NaN	NaN	NaN	NaN	NaN	NaN	NaN	NaN	NaN
1074	0.897	NaN	NaN	NaN	NaN	NaN	NaN	NaN	NaN	NaN	NaN	NaN	NaN	NaN	NaN	NaN	NaN	NaN	NaN	NaN	NaN	NaN	NaN	NaN	NaN
1075	0.954	NaN	NaN	NaN	NaN	NaN	NaN	NaN	NaN	NaN	NaN	NaN	NaN	NaN	NaN	NaN	NaN	NaN	NaN	NaN	NaN	NaN	NaN	NaN	NaN
1076	0.965	NaN	NaN	NaN	NaN	NaN	NaN	NaN	NaN	NaN	NaN	NaN	NaN	NaN	NaN	NaN	NaN	NaN	NaN	NaN	NaN	NaN	NaN	NaN	NaN
1077	0.873	NaN	NaN	NaN	NaN	NaN	NaN	NaN	NaN	NaN	NaN	NaN	NaN	NaN	NaN	NaN	NaN	NaN	NaN	NaN	NaN	NaN	NaN	NaN	NaN
1078	0.944	NaN	NaN	NaN	NaN	NaN	NaN	NaN	NaN	NaN	NaN	NaN	NaN	NaN	NaN	NaN	NaN	NaN	NaN	NaN	NaN	NaN	NaN	NaN	NaN
1079	0.906	NaN	NaN	NaN	NaN	NaN	NaN	NaN	NaN	NaN	NaN	NaN	NaN	NaN	NaN	NaN	NaN	NaN	NaN	NaN	NaN	NaN	NaN	NaN	NaN
1080	0.955	NaN	NaN	NaN	NaN	NaN	NaN	NaN	NaN	NaN	NaN	NaN	NaN	NaN	NaN	NaN	NaN	NaN	NaN	NaN	NaN	NaN	NaN	NaN	NaN
1081	1.188	NaN	NaN	NaN	NaN	NaN	NaN	NaN	NaN	NaN	NaN	NaN	NaN	NaN	NaN	NaN	NaN	NaN	NaN	NaN	NaN	NaN	NaN	NaN	NaN
1082	1.236	NaN	NaN	NaN	NaN	NaN	NaN	NaN	NaN	NaN	NaN	NaN	NaN	NaN	NaN	NaN	NaN	NaN	NaN	NaN	NaN	NaN	NaN	NaN	NaN
1083	1.226	NaN	NaN	NaN	NaN	NaN	NaN	NaN	NaN	NaN	NaN	NaN	NaN	NaN	NaN	NaN	NaN	NaN	NaN	NaN	NaN	NaN	NaN	NaN	NaN
1084	1.128	NaN	NaN	NaN	NaN	NaN	NaN	NaN	NaN	NaN	NaN	NaN	NaN	NaN	NaN	NaN	NaN	NaN	NaN	NaN	NaN	NaN	NaN	NaN	NaN
1085	1.129	NaN	NaN	NaN	NaN	NaN	NaN	NaN	NaN	NaN	NaN	NaN	NaN	NaN	NaN	NaN	NaN	NaN	NaN	NaN	NaN	NaN	NaN	NaN	NaN
1086	1.155	NaN	NaN	NaN	NaN	NaN	NaN	NaN	NaN	NaN	NaN	NaN	NaN	NaN	NaN	NaN	NaN	NaN	NaN	NaN	NaN	NaN	NaN	NaN	NaN
1087	1.178	NaN	NaN	NaN	NaN	NaN	NaN	NaN	NaN	NaN	NaN	NaN	NaN	NaN	NaN	NaN	NaN	NaN	NaN	NaN	NaN	NaN	NaN	NaN	NaN
1088	1.103	NaN	NaN	NaN	NaN	NaN	NaN	NaN	NaN	NaN	NaN	NaN	NaN	NaN	NaN	NaN	NaN	NaN	NaN	NaN	NaN	NaN	NaN	NaN	NaN
1089	1.118	NaN	NaN	NaN	NaN	NaN	NaN	NaN	NaN	NaN	NaN	NaN	NaN	NaN	NaN	NaN	NaN	NaN	NaN	NaN	NaN	NaN	NaN	NaN	NaN
1090	1.259	NaN	NaN	NaN	NaN	NaN	NaN	NaN	NaN	NaN	NaN	NaN	NaN	NaN	NaN	NaN	NaN	NaN	NaN	NaN	NaN	NaN	NaN	NaN	NaN
1091	1.274	NaN	NaN	NaN	NaN	NaN	NaN	NaN	NaN	NaN	NaN	NaN	NaN	NaN	NaN	NaN	NaN	NaN	NaN	NaN	NaN	NaN	NaN	NaN	NaN
1092	1.078	NaN	NaN	NaN	NaN	NaN	NaN	NaN	NaN	NaN	NaN	NaN	NaN	NaN	NaN	NaN	NaN	NaN	NaN	NaN	NaN	NaN	NaN	NaN	NaN
1093	1.073	NaN	NaN	NaN	NaN	NaN	NaN	NaN	NaN	NaN	NaN	NaN	NaN	NaN	NaN	NaN	NaN	NaN	NaN	NaN	NaN	NaN	NaN	NaN	NaN
1094	1.223	NaN	NaN	NaN	NaN	NaN	NaN	NaN	NaN	NaN	NaN	NaN	NaN	NaN	NaN	NaN	NaN	NaN	NaN	NaN	NaN	NaN	NaN	NaN	NaN
1095	1.175	NaN	NaN	NaN	NaN	NaN	NaN	NaN	NaN	NaN	NaN	NaN	NaN	NaN	NaN	NaN	NaN	NaN	NaN	NaN	NaN	NaN	NaN	NaN	NaN
1096	0.938	NaN	NaN	NaN	NaN	NaN	NaN	NaN	NaN	NaN	NaN	NaN	NaN	NaN	NaN	NaN	NaN	NaN	NaN	NaN	NaN	NaN	NaN	NaN	NaN
1097	0.88	NaN	NaN	NaN	NaN	NaN	NaN	NaN	NaN	NaN	NaN	NaN	NaN	NaN	NaN	NaN	NaN	NaN	NaN	NaN	NaN	NaN	NaN	NaN	NaN
1098	0.702	NaN	NaN	NaN	NaN	NaN	NaN	NaN	NaN	NaN	NaN	NaN	NaN	NaN	NaN	NaN	NaN	NaN	NaN	NaN	NaN	NaN	NaN	NaN	NaN
1099	0.617	NaN	NaN	NaN	NaN	NaN	NaN	NaN	NaN	NaN	NaN	NaN	NaN	NaN	NaN	NaN	NaN	NaN	NaN	NaN	NaN	NaN	NaN	NaN	NaN
1100	0.704	NaN	NaN	NaN	NaN	NaN	NaN	NaN	NaN	NaN	NaN	NaN	NaN	NaN	NaN	NaN	NaN	NaN	NaN	NaN	NaN	NaN	NaN	NaN	NaN
1101	0.693	NaN	NaN	NaN	NaN	NaN	NaN	NaN	NaN	NaN	NaN	NaN	NaN	NaN	NaN	NaN	NaN	NaN	NaN	NaN	NaN	NaN	NaN	NaN	NaN
1102	0.748	NaN	NaN	NaN	NaN	NaN	NaN	NaN	NaN	NaN	NaN	NaN	NaN	NaN	NaN	NaN	NaN	NaN	NaN	NaN	NaN	NaN	NaN	NaN	NaN
1103	0.833	NaN	NaN	NaN	NaN	NaN	NaN	NaN	NaN	NaN	NaN	NaN	NaN	NaN	NaN	NaN	NaN	NaN	NaN	NaN	NaN	NaN	NaN	NaN	NaN
1104	0.945	NaN	NaN	NaN	NaN	NaN	NaN	NaN	NaN	NaN	NaN	NaN	NaN	NaN	NaN	NaN	NaN	NaN	NaN	NaN	NaN	NaN	NaN	NaN	NaN
1105	1.042	NaN	NaN	NaN	NaN	NaN	NaN	NaN	NaN	NaN	NaN	NaN	NaN	NaN	NaN	NaN	NaN	NaN	NaN	NaN	NaN	NaN	NaN	NaN	NaN
1106	0.991	NaN	NaN	NaN	NaN	NaN	NaN	NaN	NaN	NaN	NaN	NaN	NaN	NaN	NaN	NaN	NaN	NaN	NaN	NaN	NaN	NaN	NaN	NaN	NaN
1107	0.758	NaN	NaN	NaN	NaN	NaN	NaN	NaN	NaN	NaN	NaN	NaN	NaN	NaN	NaN	NaN	NaN	NaN	NaN	NaN	NaN	NaN	NaN	NaN	NaN
1108	0.732	NaN	NaN	NaN	NaN	NaN	NaN	NaN	NaN	NaN	NaN	NaN	NaN	NaN	NaN	NaN	NaN	NaN	NaN	NaN	NaN	NaN	NaN	NaN	NaN
1109	0.73	NaN	NaN	NaN	NaN	NaN	NaN	NaN	NaN	NaN	NaN	NaN	NaN	NaN	NaN	NaN	NaN	NaN	NaN	NaN	NaN	NaN	NaN	NaN	NaN
1110	0.726	NaN	NaN	NaN	NaN	NaN	NaN	NaN	NaN	NaN	NaN	NaN	NaN	NaN	NaN	NaN	NaN	NaN	NaN	NaN	NaN	NaN	NaN	NaN	NaN
1111	0.829	NaN	NaN	NaN	NaN	NaN	NaN	NaN	NaN	NaN	NaN	NaN	NaN	NaN	NaN	NaN	NaN	NaN	NaN	NaN	NaN	NaN	NaN	NaN	NaN
1112	0.789	NaN	NaN	NaN	NaN	NaN	NaN	NaN	NaN	NaN	NaN	NaN	NaN	NaN	NaN	NaN	NaN	NaN	NaN	NaN	NaN	NaN	NaN	NaN	NaN
1113	0.872	NaN	NaN	NaN	NaN	NaN	NaN	NaN	NaN	NaN	NaN	NaN	NaN	NaN	NaN	NaN	NaN	NaN	NaN	NaN	NaN	NaN	NaN	NaN	NaN
1114	0.821	NaN	NaN	NaN	NaN	NaN	NaN	NaN	NaN	NaN	NaN	NaN	NaN	NaN	NaN	NaN	NaN	NaN	NaN	NaN	NaN	NaN	NaN	NaN	NaN
1115	0.714	NaN	NaN	NaN	NaN	NaN	NaN	NaN	NaN	NaN	NaN	NaN	NaN	NaN	NaN	NaN	NaN	NaN	NaN	NaN	NaN	NaN	NaN	NaN	NaN
1116	0.695	NaN	NaN	NaN	NaN	NaN	NaN	NaN	NaN	NaN	NaN	NaN	NaN	NaN	NaN	NaN	NaN	NaN	NaN	NaN	NaN	NaN	NaN	NaN	NaN
1117	0.7	NaN	NaN	NaN	NaN	NaN	NaN	NaN	NaN	NaN	NaN	NaN	NaN	NaN	NaN	NaN	NaN	NaN	NaN	NaN	NaN	NaN	NaN	NaN	NaN
1118	0.665	NaN	NaN	NaN	NaN	NaN	NaN	NaN	NaN	NaN	NaN	NaN	NaN	NaN	NaN	NaN	NaN	NaN	NaN	NaN	NaN	NaN	NaN	NaN	NaN
1119	0.696	NaN	NaN	NaN	NaN	NaN	NaN	NaN	NaN	NaN	NaN	NaN	NaN	NaN	NaN	NaN	NaN	NaN	NaN	NaN	NaN	NaN	NaN	NaN	NaN
1120	0.848	NaN	NaN	NaN	NaN	NaN	NaN	NaN	NaN	NaN	NaN	NaN	NaN	NaN	NaN	NaN	NaN	NaN	NaN	NaN	NaN	NaN	NaN	NaN	NaN
1121	0.811	NaN	NaN	NaN	NaN	NaN	NaN	NaN	NaN	NaN	NaN	NaN	NaN	NaN	NaN	NaN	NaN	NaN	NaN	NaN	NaN	NaN	NaN	NaN	NaN
1122	0.845	NaN	NaN	NaN	NaN	NaN	NaN	NaN	NaN	NaN	NaN	NaN	NaN	NaN	NaN	NaN	NaN	NaN	NaN	NaN	NaN	NaN	NaN	NaN	NaN
1123	0.906	NaN	NaN	NaN	NaN	NaN	NaN	NaN	NaN	NaN	NaN	NaN	NaN	NaN	NaN	NaN	NaN	NaN	NaN	NaN	NaN	NaN	NaN	NaN	NaN
1124	0.98	NaN	NaN	NaN	NaN	NaN	NaN	NaN	NaN	NaN	NaN	NaN	NaN	NaN	NaN	NaN	NaN	NaN	NaN	NaN	NaN	NaN	NaN	NaN	NaN
1125	1.092	NaN	NaN	NaN	NaN	NaN	NaN	NaN	NaN	NaN	NaN	NaN	NaN	NaN	NaN	NaN	NaN	NaN	NaN	NaN	NaN	NaN	NaN	NaN	NaN
1126	1.145	NaN	NaN	NaN	NaN	NaN	NaN	NaN	NaN	NaN	NaN	NaN	NaN	NaN	NaN	NaN	NaN	NaN	NaN	NaN	NaN	NaN	NaN	NaN	NaN
1127	0.95	NaN	NaN	NaN	NaN	NaN	NaN	NaN	NaN	NaN	NaN	NaN	NaN	NaN	NaN	NaN	NaN	NaN	NaN	NaN	NaN	NaN	NaN	NaN	NaN
1128	0.831	NaN	NaN	NaN	NaN	NaN	NaN	NaN	NaN	NaN	NaN	NaN	NaN	NaN	NaN	NaN	NaN	NaN	NaN	NaN	NaN	NaN	NaN	NaN	NaN
1129	0.889	NaN	NaN	NaN	NaN	NaN	NaN	NaN	NaN	NaN	NaN	NaN	NaN	NaN	NaN	NaN	NaN	NaN	NaN	NaN	NaN	NaN	NaN	NaN	NaN
1130	0.853	NaN	NaN	NaN	NaN	NaN	NaN	NaN	NaN	NaN	NaN	NaN	NaN	NaN	NaN	NaN	NaN	NaN	NaN	NaN	NaN	NaN	NaN	NaN	NaN
1131	0.83	NaN	NaN	NaN	NaN	NaN	NaN	NaN	NaN	NaN	NaN	NaN	NaN	NaN	NaN	NaN	NaN	NaN	NaN	NaN	NaN	NaN	NaN	NaN	NaN
1132	0.831	NaN	NaN	NaN	NaN	NaN	NaN	NaN	NaN	NaN	NaN	NaN	NaN	NaN	NaN	NaN	NaN	NaN	NaN	NaN	NaN	NaN	NaN	NaN	NaN
1133	0.796	NaN	NaN	NaN	NaN	NaN	NaN	NaN	NaN	NaN	NaN	NaN	NaN	NaN	NaN	NaN	NaN	NaN	NaN	NaN	NaN	NaN	NaN	NaN	NaN
1134	0.84	NaN	NaN	NaN	NaN	NaN	NaN	NaN	NaN	NaN	NaN	NaN	NaN	NaN	NaN	NaN	NaN	NaN	NaN	NaN	NaN	NaN	NaN	NaN	NaN
1135	0.81	NaN	NaN	NaN	NaN	NaN	NaN	NaN	NaN	NaN	NaN	NaN	NaN	NaN	NaN	NaN	NaN	NaN	NaN	NaN	NaN	NaN	NaN	NaN	NaN
1136	0.937	NaN	NaN	NaN	NaN	NaN	NaN	NaN	NaN	NaN	NaN	NaN	NaN	NaN	NaN	NaN	NaN	NaN	NaN	NaN	NaN	NaN	NaN	NaN	NaN
1137	1.067	NaN	NaN	NaN	NaN	NaN	NaN	NaN	NaN	NaN	NaN	NaN	NaN	NaN	NaN	NaN	NaN	NaN	NaN	NaN	NaN	NaN	NaN	NaN	NaN
1138	1.044	NaN	NaN	NaN	NaN	NaN	NaN	NaN	NaN	NaN	NaN	NaN	NaN	NaN	NaN	NaN	NaN	NaN	NaN	NaN	NaN	NaN	NaN	NaN	NaN
1139	0.961	NaN	NaN	NaN	NaN	NaN	NaN	NaN	NaN	NaN	NaN	NaN	NaN	NaN	NaN	NaN	NaN	NaN	NaN	NaN	NaN	NaN	NaN	NaN	NaN
1140	1.057	NaN	NaN	NaN	NaN	NaN	NaN	NaN	NaN	NaN	NaN	NaN	NaN	NaN	NaN	NaN	NaN	NaN	NaN	NaN	NaN	NaN	NaN	NaN	NaN
1141	1.1	NaN	NaN	NaN	NaN	NaN	NaN	NaN	NaN	NaN	NaN	NaN	NaN	NaN	NaN	NaN	NaN	NaN	NaN	NaN	NaN	NaN	NaN	NaN	NaN
1142	1.059	NaN	NaN	NaN	NaN	NaN	NaN	NaN	NaN	NaN	NaN	NaN	NaN	NaN	NaN	NaN	NaN	NaN	NaN	NaN	NaN	NaN	NaN	NaN	NaN
1143	1.056	NaN	NaN	NaN	NaN	NaN	NaN	NaN	NaN	NaN	NaN	NaN	NaN	NaN	NaN	NaN	NaN	NaN	NaN	NaN	NaN	NaN	NaN	NaN	NaN
1144	1.012	NaN	NaN	NaN	NaN	NaN	NaN	NaN	NaN	NaN	NaN	NaN	NaN	NaN	NaN	NaN	NaN	NaN	NaN	NaN	NaN	NaN	NaN	NaN	NaN
1145	0.923	NaN	NaN	NaN	NaN	NaN	NaN	NaN	NaN	NaN	NaN	NaN	NaN	NaN	NaN	NaN	NaN	NaN	NaN	NaN	NaN	NaN	NaN	NaN	NaN
1146	1.034	NaN	NaN	NaN	NaN	NaN	NaN	NaN	NaN	NaN	NaN	NaN	NaN	NaN	NaN	NaN	NaN	NaN	NaN	NaN	NaN	NaN	NaN	NaN	NaN
1147	0.937	NaN	NaN	NaN	NaN	NaN	NaN	NaN	NaN	NaN	NaN	NaN	NaN	NaN	NaN	NaN	NaN	NaN	NaN	NaN	NaN	NaN	NaN	NaN	NaN
1148	1	NaN	NaN	NaN	NaN	NaN	NaN	NaN	NaN	NaN	NaN	NaN	NaN	NaN	NaN	NaN	NaN	NaN	NaN	NaN	NaN	NaN	NaN	NaN	NaN
1149	1.195	NaN	NaN	NaN	NaN	NaN	NaN	NaN	NaN	NaN	NaN	NaN	NaN	NaN	NaN	NaN	NaN	NaN	NaN	NaN	NaN	NaN	NaN	NaN	NaN
1150	1.174	NaN	NaN	NaN	NaN	NaN	NaN	NaN	NaN	NaN	NaN	NaN	NaN	NaN	NaN	NaN	NaN	NaN	NaN	NaN	NaN	NaN	NaN	NaN	NaN
1151	1.104	NaN	NaN	NaN	NaN	NaN	NaN	NaN	NaN	NaN	NaN	NaN	NaN	NaN	NaN	NaN	NaN	NaN	NaN	NaN	NaN	NaN	NaN	NaN	NaN
1152	1.126	NaN	NaN	NaN	NaN	NaN	NaN	NaN	NaN	NaN	NaN	NaN	NaN	NaN	NaN	NaN	NaN	NaN	NaN	NaN	NaN	NaN	NaN	NaN	NaN
1153	1.101	NaN	NaN	NaN	NaN	NaN	NaN	NaN	NaN	NaN	NaN	NaN	NaN	NaN	NaN	NaN	NaN	NaN	NaN	NaN	NaN	NaN	NaN	NaN	NaN
1154	0.997	NaN	NaN	NaN	NaN	NaN	NaN	NaN	NaN	NaN	NaN	NaN	NaN	NaN	NaN	NaN	NaN	NaN	NaN	NaN	NaN	NaN	NaN	NaN	NaN
1155	1.237	NaN	NaN	NaN	NaN	NaN	NaN	NaN	NaN	NaN	NaN	NaN	NaN	NaN	NaN	NaN	NaN	NaN	NaN	NaN	NaN	NaN	NaN	NaN	NaN
1156	1.053	NaN	NaN	NaN	NaN	NaN	NaN	NaN	NaN	NaN	NaN	NaN	NaN	NaN	NaN	NaN	NaN	NaN	NaN	NaN	NaN	NaN	NaN	NaN	NaN
1157	1.11	NaN	NaN	NaN	NaN	NaN	NaN	NaN	NaN	NaN	NaN	NaN	NaN	NaN	NaN	NaN	NaN	NaN	NaN	NaN	NaN	NaN	NaN	NaN	NaN
1158	1.212	NaN	NaN	NaN	NaN	NaN	NaN	NaN	NaN	NaN	NaN	NaN	NaN	NaN	NaN	NaN	NaN	NaN	NaN	NaN	NaN	NaN	NaN	NaN	NaN
1159	1.146	NaN	NaN	NaN	NaN	NaN	NaN	NaN	NaN	NaN	NaN	NaN	NaN	NaN	NaN	NaN	NaN	NaN	NaN	NaN	NaN	NaN	NaN	NaN	NaN
1160	1.208	NaN	NaN	NaN	NaN	NaN	NaN	NaN	NaN	NaN	NaN	NaN	NaN	NaN	NaN	NaN	NaN	NaN	NaN	NaN	NaN	NaN	NaN	NaN	NaN
1161	1.192	NaN	NaN	NaN	NaN	NaN	NaN	NaN	NaN	NaN	NaN	NaN	NaN	NaN	NaN	NaN	NaN	NaN	NaN	NaN	NaN	NaN	NaN	NaN	NaN
1162	1.113	NaN	NaN	NaN	NaN	NaN	NaN	NaN	NaN	NaN	NaN	NaN	NaN	NaN	NaN	NaN	NaN	NaN	NaN	NaN	NaN	NaN	NaN	NaN	NaN
1163	1.203	NaN	NaN	NaN	NaN	NaN	NaN	NaN	NaN	NaN	NaN	NaN	NaN	NaN	NaN	NaN	NaN	NaN	NaN	NaN	NaN	NaN	NaN	NaN	NaN
1164	1.11	NaN	NaN	NaN	NaN	NaN	NaN	NaN	NaN	NaN	NaN	NaN	NaN	NaN	NaN	NaN	NaN	NaN	NaN	NaN	NaN	NaN	NaN	NaN	NaN
1165	1.213	NaN	NaN	NaN	NaN	NaN	NaN	NaN	NaN	NaN	NaN	NaN	NaN	NaN	NaN	NaN	NaN	NaN	NaN	NaN	NaN	NaN	NaN	NaN	NaN
1166	0.991	NaN	NaN	NaN	NaN	NaN	NaN	NaN	NaN	NaN	NaN	NaN	NaN	NaN	NaN	NaN	NaN	NaN	NaN	NaN	NaN	NaN	NaN	NaN	NaN
1167	1.045	NaN	NaN	NaN	NaN	NaN	NaN	NaN	NaN	NaN	NaN	NaN	NaN	NaN	NaN	NaN	NaN	NaN	NaN	NaN	NaN	NaN	NaN	NaN	NaN
1168	0.926	NaN	NaN	NaN	NaN	NaN	NaN	NaN	NaN	NaN	NaN	NaN	NaN	NaN	NaN	NaN	NaN	NaN	NaN	NaN	NaN	NaN	NaN	NaN	NaN
1169	0.954	NaN	NaN	NaN	NaN	NaN	NaN	NaN	NaN	NaN	NaN	NaN	NaN	NaN	NaN	NaN	NaN	NaN	NaN	NaN	NaN	NaN	NaN	NaN	NaN
1170	1.039	NaN	NaN	NaN	NaN	NaN	NaN	NaN	NaN	NaN	NaN	NaN	NaN	NaN	NaN	NaN	NaN	NaN	NaN	NaN	NaN	NaN	NaN	NaN	NaN
1171	0.873	NaN	NaN	NaN	NaN	NaN	NaN	NaN	NaN	NaN	NaN	NaN	NaN	NaN	NaN	NaN	NaN	NaN	NaN	NaN	NaN	NaN	NaN	NaN	NaN
1172	0.824	NaN	NaN	NaN	NaN	NaN	NaN	NaN	NaN	NaN	NaN	NaN	NaN	NaN	NaN	NaN	NaN	NaN	NaN	NaN	NaN	NaN	NaN	NaN	NaN
1173	0.785	NaN	NaN	NaN	NaN	NaN	NaN	NaN	NaN	NaN	NaN	NaN	NaN	NaN	NaN	NaN	NaN	NaN	NaN	NaN	NaN	NaN	NaN	NaN	NaN
1174	0.766	NaN	NaN	NaN	NaN	NaN	NaN	NaN	NaN	NaN	NaN	NaN	NaN	NaN	NaN	NaN	NaN	NaN	NaN	NaN	NaN	NaN	NaN	NaN	NaN
1175	0.808	NaN	NaN	NaN	NaN	NaN	NaN	NaN	NaN	NaN	NaN	NaN	NaN	NaN	NaN	NaN	NaN	NaN	NaN	NaN	NaN	NaN	NaN	NaN	NaN
1176	0.82	NaN	NaN	NaN	NaN	NaN	NaN	NaN	NaN	NaN	NaN	NaN	NaN	NaN	NaN	NaN	NaN	NaN	NaN	NaN	NaN	NaN	NaN	NaN	NaN
1177	0.836	NaN	NaN	NaN	NaN	NaN	NaN	NaN	NaN	NaN	NaN	NaN	NaN	NaN	NaN	NaN	NaN	NaN	NaN	NaN	NaN	NaN	NaN	NaN	NaN
1178	0.741	NaN	NaN	NaN	NaN	NaN	NaN	NaN	NaN	NaN	NaN	NaN	NaN	NaN	NaN	NaN	NaN	NaN	NaN	NaN	NaN	NaN	NaN	NaN	NaN
1179	0.591	NaN	NaN	NaN	NaN	NaN	NaN	NaN	NaN	NaN	NaN	NaN	NaN	NaN	NaN	NaN	NaN	NaN	NaN	NaN	NaN	NaN	NaN	NaN	NaN
1180	0.703	NaN	NaN	NaN	NaN	NaN	NaN	NaN	NaN	NaN	NaN	NaN	NaN	NaN	NaN	NaN	NaN	NaN	NaN	NaN	NaN	NaN	NaN	NaN	NaN
1181	0.71	NaN	NaN	NaN	NaN	NaN	NaN	NaN	NaN	NaN	NaN	NaN	NaN	NaN	NaN	NaN	NaN	NaN	NaN	NaN	NaN	NaN	NaN	NaN	NaN
1182	0.77	NaN	NaN	NaN	NaN	NaN	NaN	NaN	NaN	NaN	NaN	NaN	NaN	NaN	NaN	NaN	NaN	NaN	NaN	NaN	NaN	NaN	NaN	NaN	NaN
1183	0.627	NaN	NaN	NaN	NaN	NaN	NaN	NaN	NaN	NaN	NaN	NaN	NaN	NaN	NaN	NaN	NaN	NaN	NaN	NaN	NaN	NaN	NaN	NaN	NaN
1184	0.689	NaN	NaN	NaN	NaN	NaN	NaN	NaN	NaN	NaN	NaN	NaN	NaN	NaN	NaN	NaN	NaN	NaN	NaN	NaN	NaN	NaN	NaN	NaN	NaN
1185	0.667	NaN	NaN	NaN	NaN	NaN	NaN	NaN	NaN	NaN	NaN	NaN	NaN	NaN	NaN	NaN	NaN	NaN	NaN	NaN	NaN	NaN	NaN	NaN	NaN
1186	0.772	NaN	NaN	NaN	NaN	NaN	NaN	NaN	NaN	NaN	NaN	NaN	NaN	NaN	NaN	NaN	NaN	NaN	NaN	NaN	NaN	NaN	NaN	NaN	NaN
1187	0.86	NaN	NaN	NaN	NaN	NaN	NaN	NaN	NaN	NaN	NaN	NaN	NaN	NaN	NaN	NaN	NaN	NaN	NaN	NaN	NaN	NaN	NaN	NaN	NaN
1188	0.716	NaN	NaN	NaN	NaN	NaN	NaN	NaN	NaN	NaN	NaN	NaN	NaN	NaN	NaN	NaN	NaN	NaN	NaN	NaN	NaN	NaN	NaN	NaN	NaN
1189	0.767	NaN	NaN	NaN	NaN	NaN	NaN	NaN	NaN	NaN	NaN	NaN	NaN	NaN	NaN	NaN	NaN	NaN	NaN	NaN	NaN	NaN	NaN	NaN	NaN
1190	0.782	NaN	NaN	NaN	NaN	NaN	NaN	NaN	NaN	NaN	NaN	NaN	NaN	NaN	NaN	NaN	NaN	NaN	NaN	NaN	NaN	NaN	NaN	NaN	NaN
1191	0.755	NaN	NaN	NaN	NaN	NaN	NaN	NaN	NaN	NaN	NaN	NaN	NaN	NaN	NaN	NaN	NaN	NaN	NaN	NaN	NaN	NaN	NaN	NaN	NaN
1192	0.991	NaN	NaN	NaN	NaN	NaN	NaN	NaN	NaN	NaN	NaN	NaN	NaN	NaN	NaN	NaN	NaN	NaN	NaN	NaN	NaN	NaN	NaN	NaN	NaN
1193	0.959	NaN	NaN	NaN	NaN	NaN	NaN	NaN	NaN	NaN	NaN	NaN	NaN	NaN	NaN	NaN	NaN	NaN	NaN	NaN	NaN	NaN	NaN	NaN	NaN
1194	0.886	NaN	NaN	NaN	NaN	NaN	NaN	NaN	NaN	NaN	NaN	NaN	NaN	NaN	NaN	NaN	NaN	NaN	NaN	NaN	NaN	NaN	NaN	NaN	NaN
1195	0.924	NaN	NaN	NaN	NaN	NaN	NaN	NaN	NaN	NaN	NaN	NaN	NaN	NaN	NaN	NaN	NaN	NaN	NaN	NaN	NaN	NaN	NaN	NaN	NaN
1196	0.961	NaN	NaN	NaN	NaN	NaN	NaN	NaN	NaN	NaN	NaN	NaN	NaN	NaN	NaN	NaN	NaN	NaN	NaN	NaN	NaN	NaN	NaN	NaN	NaN
1197	0.899	NaN	NaN	NaN	NaN	NaN	NaN	NaN	NaN	NaN	NaN	NaN	NaN	NaN	NaN	NaN	NaN	NaN	NaN	NaN	NaN	NaN	NaN	NaN	NaN
1198	0.757	NaN	NaN	NaN	NaN	NaN	NaN	NaN	NaN	NaN	NaN	NaN	NaN	NaN	NaN	NaN	NaN	NaN	NaN	NaN	NaN	NaN	NaN	NaN	NaN
1199	0.937	NaN	NaN	NaN	NaN	NaN	NaN	NaN	NaN	NaN	NaN	NaN	NaN	NaN	NaN	NaN	NaN	NaN	NaN	NaN	NaN	NaN	NaN	NaN	NaN
1200	0.95	NaN	NaN	NaN	NaN	NaN	NaN	NaN	NaN	NaN	NaN	NaN	NaN	NaN	NaN	NaN	NaN	NaN	NaN	NaN	NaN	NaN	NaN	NaN	NaN
1201	0.951	NaN	NaN	NaN	NaN	NaN	NaN	NaN	NaN	NaN	NaN	NaN	NaN	NaN	NaN	NaN	NaN	NaN	NaN	NaN	NaN	NaN	NaN	NaN	NaN
1202	1.014	NaN	NaN	NaN	NaN	NaN	NaN	NaN	NaN	NaN	NaN	NaN	NaN	NaN	NaN	NaN	NaN	NaN	NaN	NaN	NaN	NaN	NaN	NaN	NaN
1203	1.024	NaN	NaN	NaN	NaN	NaN	NaN	NaN	NaN	NaN	NaN	NaN	NaN	NaN	NaN	NaN	NaN	NaN	NaN	NaN	NaN	NaN	NaN	NaN	NaN
1204	1.065	NaN	NaN	NaN	NaN	NaN	NaN	NaN	NaN	NaN	NaN	NaN	NaN	NaN	NaN	NaN	NaN	NaN	NaN	NaN	NaN	NaN	NaN	NaN	NaN
1205	1.072	NaN	NaN	NaN	NaN	NaN	NaN	NaN	NaN	NaN	NaN	NaN	NaN	NaN	NaN	NaN	NaN	NaN	NaN	NaN	NaN	NaN	NaN	NaN	NaN
1206	1.037	NaN	NaN	NaN	NaN	NaN	NaN	NaN	NaN	NaN	NaN	NaN	NaN	NaN	NaN	NaN	NaN	NaN	NaN	NaN	NaN	NaN	NaN	NaN	NaN
1207	1.019	NaN	NaN	NaN	NaN	NaN	NaN	NaN	NaN	NaN	NaN	NaN	NaN	NaN	NaN	NaN	NaN	NaN	NaN	NaN	NaN	NaN	NaN	NaN	NaN
1208	0.96	NaN	NaN	NaN	NaN	NaN	NaN	NaN	NaN	NaN	NaN	NaN	NaN	NaN	NaN	NaN	NaN	NaN	NaN	NaN	NaN	NaN	NaN	NaN	NaN
1209	0.904	NaN	NaN	NaN	NaN	NaN	NaN	NaN	NaN	NaN	NaN	NaN	NaN	NaN	NaN	NaN	NaN	NaN	NaN	NaN	NaN	NaN	NaN	NaN	NaN
1210	0.9	NaN	NaN	NaN	NaN	NaN	NaN	NaN	NaN	NaN	NaN	NaN	NaN	NaN	NaN	NaN	NaN	NaN	NaN	NaN	NaN	NaN	NaN	NaN	NaN
1211	0.822	NaN	NaN	NaN	NaN	NaN	NaN	NaN	NaN	NaN	NaN	NaN	NaN	NaN	NaN	NaN	NaN	NaN	NaN	NaN	NaN	NaN	NaN	NaN	NaN
1212	1.077	NaN	NaN	NaN	NaN	NaN	NaN	NaN	NaN	NaN	NaN	NaN	NaN	NaN	NaN	NaN	NaN	NaN	NaN	NaN	NaN	NaN	NaN	NaN	NaN
1213	1.035	NaN	NaN	NaN	NaN	NaN	NaN	NaN	NaN	NaN	NaN	NaN	NaN	NaN	NaN	NaN	NaN	NaN	NaN	NaN	NaN	NaN	NaN	NaN	NaN
1214	1.103	NaN	NaN	NaN	NaN	NaN	NaN	NaN	NaN	NaN	NaN	NaN	NaN	NaN	NaN	NaN	NaN	NaN	NaN	NaN	NaN	NaN	NaN	NaN	NaN
1215	1.166	NaN	NaN	NaN	NaN	NaN	NaN	NaN	NaN	NaN	NaN	NaN	NaN	NaN	NaN	NaN	NaN	NaN	NaN	NaN	NaN	NaN	NaN	NaN	NaN
1216	1.052	NaN	NaN	NaN	NaN	NaN	NaN	NaN	NaN	NaN	NaN	NaN	NaN	NaN	NaN	NaN	NaN	NaN	NaN	NaN	NaN	NaN	NaN	NaN	NaN
1217	0.962	NaN	NaN	NaN	NaN	NaN	NaN	NaN	NaN	NaN	NaN	NaN	NaN	NaN	NaN	NaN	NaN	NaN	NaN	NaN	NaN	NaN	NaN	NaN	NaN
1218	0.992	NaN	NaN	NaN	NaN	NaN	NaN	NaN	NaN	NaN	NaN	NaN	NaN	NaN	NaN	NaN	NaN	NaN	NaN	NaN	NaN	NaN	NaN	NaN	NaN
1219	1.053	NaN	NaN	NaN	NaN	NaN	NaN	NaN	NaN	NaN	NaN	NaN	NaN	NaN	NaN	NaN	NaN	NaN	NaN	NaN	NaN	NaN	NaN	NaN	NaN
1220	1.133	NaN	NaN	NaN	NaN	NaN	NaN	NaN	NaN	NaN	NaN	NaN	NaN	NaN	NaN	NaN	NaN	NaN	NaN	NaN	NaN	NaN	NaN	NaN	NaN
1221	1.265	NaN	NaN	NaN	NaN	NaN	NaN	NaN	NaN	NaN	NaN	NaN	NaN	NaN	NaN	NaN	NaN	NaN	NaN	NaN	NaN	NaN	NaN	NaN	NaN
1222	1.121	NaN	NaN	NaN	NaN	NaN	NaN	NaN	NaN	NaN	NaN	NaN	NaN	NaN	NaN	NaN	NaN	NaN	NaN	NaN	NaN	NaN	NaN	NaN	NaN
1223	1.106	NaN	NaN	NaN	NaN	NaN	NaN	NaN	NaN	NaN	NaN	NaN	NaN	NaN	NaN	NaN	NaN	NaN	NaN	NaN	NaN	NaN	NaN	NaN	NaN
1224	0.999	NaN	NaN	NaN	NaN	NaN	NaN	NaN	NaN	NaN	NaN	NaN	NaN	NaN	NaN	NaN	NaN	NaN	NaN	NaN	NaN	NaN	NaN	NaN	NaN
1225	0.885	NaN	NaN	NaN	NaN	NaN	NaN	NaN	NaN	NaN	NaN	NaN	NaN	NaN	NaN	NaN	NaN	NaN	NaN	NaN	NaN	NaN	NaN	NaN	NaN
1226	0.922	NaN	NaN	NaN	NaN	NaN	NaN	NaN	NaN	NaN	NaN	NaN	NaN	NaN	NaN	NaN	NaN	NaN	NaN	NaN	NaN	NaN	NaN	NaN	NaN
1227	1.076	NaN	NaN	NaN	NaN	NaN	NaN	NaN	NaN	NaN	NaN	NaN	NaN	NaN	NaN	NaN	NaN	NaN	NaN	NaN	NaN	NaN	NaN	NaN	NaN
1228	1.134	NaN	NaN	NaN	NaN	NaN	NaN	NaN	NaN	NaN	NaN	NaN	NaN	NaN	NaN	NaN	NaN	NaN	NaN	NaN	NaN	NaN	NaN	NaN	NaN
1229	1.028	NaN	NaN	NaN	NaN	NaN	NaN	NaN	NaN	NaN	NaN	NaN	NaN	NaN	NaN	NaN	NaN	NaN	NaN	NaN	NaN	NaN	NaN	NaN	NaN
1230	0.927	NaN	NaN	NaN	NaN	NaN	NaN	NaN	NaN	NaN	NaN	NaN	NaN	NaN	NaN	NaN	NaN	NaN	NaN	NaN	NaN	NaN	NaN	NaN	NaN
1231	0.908	NaN	NaN	NaN	NaN	NaN	NaN	NaN	NaN	NaN	NaN	NaN	NaN	NaN	NaN	NaN	NaN	NaN	NaN	NaN	NaN	NaN	NaN	NaN	NaN
1232	0.856	NaN	NaN	NaN	NaN	NaN	NaN	NaN	NaN	NaN	NaN	NaN	NaN	NaN	NaN	NaN	NaN	NaN	NaN	NaN	NaN	NaN	NaN	NaN	NaN
1233	0.824	NaN	NaN	NaN	NaN	NaN	NaN	NaN	NaN	NaN	NaN	NaN	NaN	NaN	NaN	NaN	NaN	NaN	NaN	NaN	NaN	NaN	NaN	NaN	NaN
1234	0.839	NaN	NaN	NaN	NaN	NaN	NaN	NaN	NaN	NaN	NaN	NaN	NaN	NaN	NaN	NaN	NaN	NaN	NaN	NaN	NaN	NaN	NaN	NaN	NaN
1235	0.987	NaN	1.205	NaN	NaN	NaN	NaN	NaN	NaN	NaN	NaN	NaN	NaN	NaN	NaN	NaN	NaN	NaN	NaN	NaN	NaN	NaN	NaN	NaN	NaN
1236	0.826	NaN	0.975	NaN	NaN	NaN	NaN	NaN	NaN	NaN	NaN	NaN	NaN	NaN	NaN	NaN	NaN	NaN	NaN	NaN	NaN	NaN	NaN	NaN	NaN
1237	0.995	NaN	1.053	NaN	NaN	NaN	NaN	NaN	NaN	NaN	NaN	NaN	NaN	NaN	NaN	NaN	NaN	NaN	NaN	NaN	NaN	NaN	NaN	NaN	NaN
1238	1.071	NaN	0.958	NaN	NaN	NaN	NaN	NaN	NaN	NaN	NaN	NaN	NaN	NaN	NaN	NaN	NaN	NaN	NaN	NaN	NaN	NaN	NaN	NaN	NaN
1239	1.19	NaN	1.385	NaN	NaN	NaN	NaN	NaN	NaN	NaN	NaN	NaN	NaN	NaN	NaN	NaN	NaN	NaN	NaN	NaN	NaN	NaN	NaN	NaN	NaN
1240	1.177	NaN	1.437	NaN	NaN	NaN	NaN	NaN	NaN	NaN	NaN	NaN	NaN	NaN	NaN	NaN	NaN	NaN	NaN	NaN	NaN	NaN	NaN	NaN	NaN
1241	1.127	NaN	1.462	NaN	NaN	NaN	NaN	NaN	NaN	NaN	NaN	NaN	NaN	NaN	NaN	NaN	NaN	NaN	NaN	NaN	NaN	NaN	NaN	NaN	NaN
1242	1.208	NaN	1.576	NaN	NaN	NaN	NaN	NaN	NaN	NaN	NaN	NaN	NaN	NaN	NaN	NaN	NaN	NaN	NaN	NaN	NaN	NaN	NaN	NaN	NaN
1243	1.215	NaN	1.455	NaN	NaN	NaN	NaN	NaN	NaN	NaN	NaN	NaN	NaN	NaN	NaN	NaN	NaN	NaN	NaN	NaN	NaN	NaN	NaN	NaN	NaN
1244	1.124	NaN	1.452	NaN	NaN	NaN	NaN	NaN	NaN	NaN	NaN	NaN	NaN	NaN	NaN	NaN	NaN	NaN	NaN	NaN	NaN	NaN	NaN	NaN	NaN
1245	1.159	NaN	1.394	NaN	NaN	NaN	NaN	NaN	NaN	NaN	NaN	NaN	NaN	NaN	NaN	NaN	NaN	NaN	NaN	NaN	NaN	NaN	NaN	NaN	NaN
1246	1.027	NaN	1.387	NaN	NaN	NaN	NaN	NaN	NaN	NaN	NaN	NaN	NaN	NaN	NaN	NaN	NaN	NaN	NaN	NaN	NaN	NaN	NaN	NaN	NaN
1247	1.167	NaN	1.413	NaN	NaN	NaN	NaN	NaN	NaN	NaN	NaN	NaN	NaN	NaN	NaN	NaN	NaN	NaN	NaN	NaN	NaN	NaN	NaN	NaN	NaN
1248	1.091	NaN	1.437	NaN	NaN	NaN	NaN	NaN	NaN	NaN	NaN	NaN	NaN	NaN	NaN	NaN	NaN	NaN	NaN	NaN	NaN	NaN	NaN	NaN	NaN
1249	1.024	NaN	1.331	NaN	NaN	NaN	NaN	NaN	NaN	NaN	NaN	NaN	NaN	NaN	NaN	NaN	NaN	NaN	NaN	NaN	NaN	NaN	NaN	NaN	NaN
1250	1.062	NaN	1.285	NaN	NaN	NaN	NaN	NaN	NaN	NaN	NaN	NaN	NaN	NaN	NaN	NaN	NaN	NaN	NaN	NaN	NaN	NaN	NaN	NaN	NaN
1251	1.074	NaN	1.41	NaN	NaN	NaN	NaN	NaN	NaN	NaN	NaN	NaN	NaN	NaN	NaN	NaN	NaN	NaN	NaN	NaN	NaN	NaN	NaN	NaN	NaN
1252	0.961	NaN	1.417	NaN	NaN	NaN	NaN	NaN	NaN	NaN	NaN	NaN	NaN	NaN	NaN	NaN	NaN	NaN	NaN	NaN	NaN	NaN	NaN	NaN	NaN
1253	1	NaN	1.501	NaN	NaN	NaN	NaN	NaN	NaN	NaN	NaN	NaN	NaN	NaN	NaN	NaN	NaN	NaN	NaN	NaN	NaN	NaN	NaN	NaN	NaN
1254	0.933	NaN	1.355	NaN	NaN	NaN	NaN	NaN	NaN	NaN	NaN	NaN	NaN	NaN	NaN	NaN	NaN	NaN	NaN	NaN	NaN	NaN	NaN	NaN	NaN
1255	1.113	NaN	1.49	NaN	NaN	NaN	NaN	NaN	NaN	NaN	NaN	NaN	NaN	NaN	NaN	NaN	NaN	NaN	NaN	NaN	NaN	NaN	NaN	NaN	NaN
1256	1.191	NaN	1.211	NaN	NaN	NaN	NaN	NaN	NaN	NaN	NaN	NaN	NaN	NaN	NaN	NaN	NaN	NaN	NaN	NaN	NaN	NaN	NaN	NaN	NaN
1257	1.153	NaN	1.06	NaN	NaN	NaN	NaN	NaN	NaN	NaN	NaN	NaN	NaN	NaN	NaN	NaN	NaN	NaN	NaN	NaN	NaN	NaN	NaN	NaN	NaN
1258	1.091	NaN	1.26	NaN	NaN	NaN	NaN	NaN	NaN	NaN	NaN	NaN	NaN	NaN	NaN	NaN	NaN	NaN	NaN	NaN	NaN	NaN	NaN	NaN	NaN
1259	1.191	NaN	1.221	NaN	NaN	NaN	NaN	NaN	NaN	NaN	NaN	NaN	NaN	NaN	NaN	NaN	NaN	NaN	NaN	NaN	NaN	NaN	NaN	NaN	NaN
1260	1.057	NaN	1.158	NaN	NaN	NaN	NaN	NaN	NaN	NaN	NaN	NaN	NaN	NaN	NaN	NaN	NaN	NaN	NaN	NaN	NaN	NaN	NaN	NaN	NaN
1261	0.964	NaN	1.002	NaN	NaN	NaN	NaN	NaN	NaN	NaN	NaN	NaN	NaN	NaN	NaN	NaN	NaN	NaN	NaN	NaN	NaN	NaN	NaN	NaN	NaN
1262	1.121	NaN	0.889	NaN	NaN	NaN	NaN	NaN	NaN	NaN	NaN	NaN	NaN	NaN	NaN	NaN	NaN	NaN	NaN	NaN	NaN	NaN	NaN	NaN	NaN
1263	0.965	NaN	0.944	NaN	NaN	NaN	NaN	NaN	NaN	NaN	NaN	NaN	NaN	NaN	NaN	NaN	NaN	NaN	NaN	NaN	NaN	NaN	NaN	NaN	NaN
1264	0.975	NaN	0.753	NaN	NaN	NaN	NaN	NaN	NaN	NaN	NaN	NaN	NaN	NaN	NaN	NaN	NaN	NaN	NaN	NaN	NaN	NaN	NaN	NaN	NaN
1265	1.117	NaN	0.971	NaN	NaN	NaN	NaN	NaN	NaN	NaN	NaN	NaN	NaN	NaN	NaN	NaN	NaN	NaN	NaN	NaN	NaN	NaN	NaN	NaN	NaN
1266	1.351	NaN	1.019	NaN	NaN	NaN	NaN	NaN	NaN	NaN	NaN	NaN	NaN	NaN	NaN	NaN	NaN	NaN	NaN	NaN	NaN	NaN	NaN	NaN	NaN
1267	1.325	NaN	1.085	NaN	NaN	NaN	NaN	NaN	NaN	NaN	NaN	NaN	NaN	NaN	NaN	NaN	NaN	NaN	NaN	NaN	NaN	NaN	NaN	NaN	NaN
1268	1.205	NaN	1.135	NaN	NaN	NaN	NaN	NaN	NaN	NaN	NaN	NaN	NaN	NaN	NaN	NaN	NaN	NaN	NaN	NaN	NaN	NaN	NaN	NaN	NaN
1269	1.335	NaN	1.237	NaN	NaN	NaN	NaN	NaN	NaN	NaN	NaN	NaN	NaN	NaN	NaN	NaN	NaN	NaN	NaN	NaN	NaN	NaN	NaN	NaN	NaN
1270	1.054	NaN	1.114	NaN	NaN	NaN	NaN	NaN	NaN	NaN	NaN	NaN	NaN	NaN	NaN	NaN	NaN	NaN	NaN	NaN	NaN	NaN	NaN	NaN	NaN
1271	1.183	NaN	1.082	NaN	NaN	NaN	NaN	NaN	NaN	NaN	NaN	NaN	NaN	NaN	NaN	NaN	NaN	NaN	NaN	NaN	NaN	NaN	NaN	NaN	NaN
1272	1.098	NaN	0.971	NaN	NaN	NaN	NaN	NaN	NaN	NaN	NaN	NaN	NaN	NaN	NaN	NaN	NaN	NaN	NaN	NaN	NaN	NaN	NaN	NaN	NaN
1273	1.027	NaN	1.138	NaN	NaN	NaN	NaN	NaN	NaN	NaN	NaN	NaN	NaN	NaN	NaN	NaN	NaN	NaN	NaN	NaN	NaN	NaN	NaN	NaN	NaN
1274	0.991	NaN	1.072	NaN	NaN	NaN	NaN	NaN	NaN	NaN	NaN	NaN	NaN	NaN	NaN	NaN	NaN	NaN	NaN	NaN	NaN	NaN	NaN	NaN	NaN
1275	1.028	NaN	1.229	NaN	NaN	NaN	NaN	NaN	NaN	NaN	NaN	NaN	NaN	NaN	NaN	NaN	NaN	NaN	NaN	NaN	NaN	NaN	NaN	NaN	NaN
1276	1.156	NaN	0.807	NaN	NaN	NaN	NaN	NaN	NaN	NaN	NaN	NaN	NaN	NaN	NaN	NaN	NaN	NaN	NaN	NaN	NaN	NaN	NaN	NaN	NaN
1277	1.007	NaN	0.774	NaN	NaN	NaN	NaN	NaN	NaN	NaN	NaN	NaN	NaN	NaN	NaN	NaN	NaN	NaN	NaN	NaN	NaN	NaN	NaN	NaN	NaN
1278	1.071	NaN	0.812	NaN	NaN	NaN	NaN	NaN	NaN	NaN	NaN	NaN	NaN	NaN	NaN	NaN	NaN	NaN	NaN	NaN	NaN	NaN	NaN	NaN	NaN
1279	0.934	NaN	0.758	NaN	NaN	NaN	NaN	NaN	NaN	NaN	NaN	NaN	NaN	NaN	NaN	NaN	NaN	NaN	NaN	NaN	NaN	NaN	NaN	NaN	NaN
1280	0.95	NaN	0.805	NaN	NaN	NaN	NaN	NaN	NaN	NaN	NaN	NaN	NaN	NaN	NaN	NaN	NaN	NaN	NaN	NaN	NaN	NaN	NaN	NaN	NaN
1281	1.085	NaN	0.722	NaN	NaN	NaN	NaN	NaN	NaN	NaN	NaN	NaN	NaN	NaN	NaN	NaN	NaN	NaN	NaN	NaN	NaN	NaN	NaN	NaN	NaN
1282	0.98	NaN	0.733	NaN	NaN	NaN	NaN	NaN	NaN	NaN	NaN	NaN	NaN	NaN	NaN	NaN	NaN	NaN	NaN	NaN	NaN	NaN	NaN	NaN	NaN
1283	0.98	NaN	0.85	NaN	NaN	NaN	NaN	NaN	NaN	NaN	NaN	NaN	NaN	NaN	NaN	NaN	NaN	NaN	NaN	NaN	NaN	NaN	NaN	NaN	NaN
1284	1.122	NaN	0.939	NaN	NaN	NaN	NaN	NaN	NaN	NaN	NaN	NaN	NaN	NaN	NaN	NaN	NaN	NaN	NaN	NaN	NaN	NaN	NaN	NaN	NaN
1285	0.763	NaN	0.902	NaN	NaN	NaN	NaN	NaN	NaN	NaN	NaN	NaN	NaN	NaN	NaN	NaN	NaN	NaN	NaN	NaN	NaN	NaN	NaN	NaN	NaN
1286	0.739	NaN	0.912	NaN	NaN	NaN	NaN	NaN	NaN	NaN	NaN	NaN	NaN	NaN	NaN	NaN	NaN	NaN	NaN	NaN	NaN	NaN	NaN	NaN	NaN
1287	0.917	NaN	0.79	NaN	NaN	NaN	NaN	NaN	NaN	NaN	NaN	NaN	NaN	NaN	NaN	NaN	NaN	NaN	NaN	NaN	NaN	NaN	NaN	NaN	NaN
1288	0.726	NaN	0.84	NaN	NaN	NaN	NaN	NaN	NaN	NaN	NaN	NaN	NaN	NaN	NaN	NaN	NaN	NaN	NaN	NaN	NaN	NaN	NaN	NaN	NaN
1289	0.888	NaN	0.858	NaN	NaN	NaN	NaN	NaN	NaN	NaN	NaN	NaN	NaN	NaN	NaN	NaN	NaN	NaN	NaN	NaN	NaN	NaN	NaN	NaN	NaN
1290	0.821	NaN	0.997	NaN	NaN	NaN	NaN	NaN	NaN	NaN	NaN	NaN	NaN	NaN	NaN	NaN	NaN	NaN	NaN	NaN	NaN	NaN	NaN	NaN	NaN
1291	0.936	NaN	0.979	NaN	NaN	NaN	NaN	NaN	NaN	NaN	NaN	NaN	NaN	NaN	NaN	NaN	NaN	NaN	NaN	NaN	NaN	NaN	NaN	NaN	NaN
1292	0.877	NaN	0.841	NaN	NaN	NaN	NaN	NaN	NaN	NaN	NaN	NaN	NaN	NaN	NaN	NaN	NaN	NaN	NaN	NaN	NaN	NaN	NaN	NaN	NaN
1293	0.985	NaN	0.816	NaN	NaN	NaN	NaN	NaN	NaN	NaN	NaN	NaN	NaN	NaN	NaN	NaN	NaN	NaN	NaN	NaN	NaN	NaN	NaN	NaN	NaN
1294	0.897	NaN	0.705	NaN	NaN	NaN	NaN	NaN	NaN	NaN	NaN	NaN	NaN	NaN	NaN	NaN	NaN	NaN	NaN	NaN	NaN	NaN	NaN	NaN	NaN
1295	0.943	NaN	0.621	NaN	NaN	NaN	NaN	NaN	NaN	NaN	NaN	NaN	NaN	NaN	NaN	NaN	NaN	NaN	NaN	NaN	NaN	NaN	NaN	NaN	NaN
1296	1.035	NaN	0.659	NaN	NaN	NaN	NaN	NaN	NaN	NaN	NaN	NaN	NaN	NaN	NaN	NaN	NaN	NaN	NaN	NaN	NaN	NaN	NaN	NaN	NaN
1297	0.967	NaN	0.637	NaN	NaN	NaN	NaN	NaN	NaN	NaN	NaN	NaN	NaN	NaN	NaN	NaN	NaN	NaN	NaN	NaN	NaN	NaN	NaN	NaN	NaN
1298	0.902	NaN	0.668	NaN	NaN	NaN	NaN	NaN	NaN	NaN	NaN	NaN	NaN	NaN	NaN	NaN	NaN	NaN	NaN	NaN	NaN	NaN	NaN	NaN	NaN
1299	0.992	NaN	0.815	NaN	NaN	NaN	NaN	NaN	NaN	NaN	NaN	NaN	NaN	NaN	NaN	NaN	NaN	NaN	NaN	NaN	NaN	NaN	NaN	NaN	NaN
1300	1.02	NaN	0.929	NaN	NaN	NaN	NaN	NaN	NaN	NaN	NaN	NaN	NaN	NaN	NaN	NaN	NaN	NaN	NaN	NaN	NaN	NaN	NaN	NaN	NaN
1301	1.042	NaN	0.989	NaN	NaN	NaN	NaN	NaN	NaN	NaN	NaN	NaN	NaN	NaN	NaN	NaN	NaN	NaN	NaN	NaN	NaN	NaN	NaN	NaN	NaN
1302	0.954	NaN	1.038	NaN	NaN	NaN	NaN	NaN	NaN	NaN	NaN	NaN	NaN	NaN	NaN	NaN	NaN	NaN	NaN	NaN	NaN	NaN	NaN	NaN	NaN
1303	1.176	NaN	1.096	NaN	NaN	NaN	NaN	NaN	NaN	NaN	NaN	NaN	NaN	NaN	NaN	NaN	NaN	NaN	NaN	NaN	NaN	NaN	NaN	NaN	NaN
1304	1.047	NaN	0.858	NaN	NaN	NaN	NaN	NaN	NaN	NaN	NaN	NaN	NaN	NaN	NaN	NaN	NaN	NaN	NaN	NaN	NaN	NaN	NaN	NaN	NaN
1305	0.874	NaN	0.924	NaN	NaN	NaN	NaN	NaN	NaN	NaN	NaN	NaN	NaN	NaN	NaN	NaN	NaN	NaN	NaN	NaN	NaN	NaN	NaN	NaN	NaN
1306	1.066	NaN	0.889	NaN	NaN	NaN	NaN	NaN	NaN	NaN	NaN	NaN	NaN	NaN	NaN	NaN	NaN	NaN	NaN	NaN	NaN	NaN	NaN	NaN	NaN
1307	1.038	NaN	0.771	NaN	NaN	NaN	NaN	NaN	NaN	NaN	NaN	NaN	NaN	NaN	NaN	NaN	NaN	NaN	NaN	NaN	NaN	NaN	NaN	NaN	NaN
1308	1.005	NaN	0.836	NaN	NaN	NaN	NaN	NaN	NaN	NaN	NaN	NaN	NaN	NaN	NaN	NaN	NaN	NaN	NaN	NaN	NaN	NaN	NaN	NaN	NaN
1309	0.983	NaN	0.943	NaN	NaN	NaN	NaN	NaN	NaN	NaN	NaN	NaN	NaN	NaN	NaN	NaN	NaN	NaN	NaN	NaN	NaN	NaN	NaN	NaN	NaN
1310	0.894	NaN	0.998	NaN	NaN	NaN	NaN	NaN	NaN	NaN	NaN	NaN	NaN	NaN	NaN	NaN	NaN	NaN	NaN	NaN	NaN	NaN	NaN	NaN	NaN
1311	0.929	NaN	0.926	NaN	NaN	NaN	NaN	NaN	NaN	NaN	NaN	NaN	NaN	NaN	NaN	NaN	NaN	NaN	NaN	NaN	NaN	NaN	NaN	NaN	NaN
1312	1.017	NaN	0.997	NaN	NaN	NaN	NaN	NaN	NaN	NaN	NaN	NaN	NaN	NaN	NaN	NaN	NaN	NaN	NaN	NaN	NaN	NaN	NaN	NaN	NaN
1313	1.105	NaN	0.962	NaN	NaN	NaN	NaN	NaN	NaN	NaN	NaN	NaN	NaN	NaN	NaN	NaN	NaN	NaN	NaN	NaN	NaN	NaN	NaN	NaN	NaN
1314	0.956	NaN	1.056	NaN	NaN	NaN	NaN	NaN	NaN	NaN	NaN	NaN	NaN	NaN	NaN	NaN	NaN	NaN	NaN	NaN	NaN	NaN	NaN	NaN	NaN
1315	0.846	NaN	1.069	NaN	NaN	NaN	NaN	NaN	NaN	NaN	NaN	NaN	NaN	NaN	NaN	NaN	NaN	NaN	NaN	NaN	NaN	NaN	NaN	NaN	NaN
1316	0.858	NaN	1.132	NaN	NaN	NaN	NaN	NaN	NaN	NaN	NaN	NaN	NaN	NaN	NaN	NaN	NaN	NaN	NaN	NaN	NaN	NaN	NaN	NaN	NaN
1317	1.039	NaN	1.105	NaN	NaN	NaN	NaN	NaN	NaN	NaN	NaN	NaN	NaN	NaN	NaN	NaN	NaN	NaN	NaN	NaN	NaN	NaN	NaN	NaN	NaN
1318	1.07	NaN	0.886	NaN	NaN	NaN	NaN	NaN	NaN	NaN	NaN	NaN	NaN	NaN	NaN	NaN	NaN	NaN	NaN	NaN	NaN	NaN	NaN	NaN	NaN
1319	1.137	NaN	0.957	NaN	NaN	NaN	NaN	NaN	NaN	NaN	NaN	NaN	NaN	NaN	NaN	NaN	NaN	NaN	NaN	NaN	NaN	NaN	NaN	NaN	NaN
1320	1.004	NaN	0.979	NaN	NaN	NaN	NaN	NaN	NaN	NaN	NaN	NaN	NaN	NaN	NaN	NaN	NaN	NaN	NaN	NaN	NaN	NaN	NaN	NaN	NaN
1321	0.949	NaN	1.038	NaN	NaN	NaN	NaN	NaN	NaN	NaN	NaN	NaN	NaN	NaN	NaN	NaN	NaN	NaN	NaN	NaN	NaN	NaN	NaN	NaN	NaN
1322	0.943	NaN	0.951	NaN	NaN	NaN	NaN	NaN	NaN	NaN	NaN	NaN	NaN	NaN	NaN	NaN	NaN	NaN	NaN	NaN	NaN	NaN	NaN	NaN	NaN
1323	1.092	NaN	1.169	NaN	NaN	NaN	NaN	NaN	NaN	NaN	NaN	NaN	NaN	NaN	NaN	NaN	NaN	NaN	NaN	NaN	NaN	NaN	NaN	NaN	NaN
1324	1.021	NaN	1.195	NaN	NaN	NaN	NaN	NaN	NaN	NaN	NaN	NaN	NaN	NaN	NaN	NaN	NaN	NaN	NaN	NaN	NaN	NaN	NaN	NaN	NaN
1325	1.043	NaN	1.167	NaN	NaN	NaN	NaN	NaN	NaN	NaN	NaN	NaN	NaN	NaN	NaN	NaN	NaN	NaN	NaN	NaN	NaN	NaN	NaN	NaN	NaN
1326	0.913	NaN	1.147	NaN	NaN	NaN	NaN	NaN	NaN	NaN	NaN	NaN	NaN	NaN	NaN	NaN	NaN	NaN	NaN	NaN	NaN	NaN	NaN	NaN	NaN
1327	0.954	NaN	1.029	NaN	NaN	NaN	NaN	NaN	NaN	NaN	NaN	NaN	NaN	NaN	NaN	NaN	NaN	NaN	NaN	NaN	NaN	NaN	NaN	NaN	NaN
1328	0.663	NaN	0.613	NaN	NaN	NaN	NaN	NaN	NaN	NaN	NaN	NaN	NaN	NaN	NaN	NaN	NaN	NaN	NaN	NaN	NaN	NaN	NaN	NaN	NaN
1329	0.967	NaN	0.715	NaN	NaN	NaN	NaN	NaN	NaN	NaN	NaN	NaN	NaN	NaN	NaN	NaN	NaN	NaN	NaN	NaN	NaN	NaN	NaN	NaN	NaN
1330	0.997	NaN	0.869	NaN	NaN	NaN	NaN	NaN	NaN	NaN	NaN	NaN	NaN	NaN	NaN	NaN	NaN	NaN	NaN	NaN	NaN	NaN	NaN	NaN	NaN
1331	0.979	NaN	0.817	NaN	NaN	NaN	NaN	NaN	NaN	NaN	NaN	NaN	NaN	NaN	NaN	NaN	NaN	NaN	NaN	NaN	NaN	NaN	NaN	NaN	NaN
1332	0.916	NaN	0.923	NaN	NaN	NaN	NaN	NaN	NaN	NaN	NaN	NaN	NaN	NaN	NaN	NaN	NaN	NaN	NaN	NaN	NaN	NaN	NaN	NaN	NaN
1333	0.866	NaN	0.97	NaN	NaN	NaN	NaN	NaN	NaN	NaN	NaN	NaN	NaN	NaN	NaN	NaN	NaN	NaN	NaN	NaN	NaN	NaN	NaN	NaN	NaN
1334	1.062	NaN	0.997	NaN	NaN	NaN	NaN	NaN	NaN	NaN	NaN	NaN	NaN	NaN	NaN	NaN	NaN	NaN	NaN	NaN	NaN	NaN	NaN	NaN	NaN
1335	1.108	NaN	1.06	NaN	NaN	NaN	NaN	NaN	NaN	NaN	NaN	NaN	NaN	NaN	NaN	NaN	NaN	NaN	NaN	NaN	NaN	NaN	NaN	NaN	NaN
1336	1.024	NaN	1.006	NaN	NaN	NaN	NaN	NaN	NaN	NaN	NaN	NaN	NaN	NaN	NaN	NaN	NaN	NaN	NaN	NaN	NaN	NaN	NaN	NaN	NaN
1337	1.169	NaN	1.101	NaN	NaN	NaN	NaN	NaN	NaN	NaN	NaN	NaN	NaN	NaN	NaN	NaN	NaN	NaN	NaN	NaN	NaN	NaN	NaN	NaN	NaN
1338	0.91	NaN	1.147	NaN	NaN	NaN	NaN	NaN	NaN	NaN	NaN	NaN	NaN	NaN	NaN	NaN	NaN	NaN	NaN	NaN	NaN	NaN	NaN	NaN	NaN
1339	1.011	NaN	1.154	NaN	NaN	NaN	NaN	NaN	NaN	NaN	NaN	NaN	NaN	NaN	NaN	NaN	NaN	NaN	NaN	NaN	NaN	NaN	NaN	NaN	NaN
1340	0.9	NaN	0.858	NaN	NaN	NaN	NaN	NaN	NaN	NaN	NaN	NaN	NaN	NaN	NaN	NaN	NaN	NaN	NaN	NaN	NaN	NaN	NaN	NaN	NaN
1341	1.078	NaN	1.04	NaN	NaN	NaN	NaN	NaN	NaN	NaN	NaN	NaN	NaN	NaN	NaN	NaN	NaN	NaN	NaN	NaN	NaN	NaN	NaN	NaN	NaN
1342	0.923	NaN	1.038	NaN	NaN	NaN	NaN	NaN	NaN	NaN	NaN	NaN	NaN	NaN	NaN	NaN	NaN	NaN	NaN	NaN	NaN	NaN	NaN	NaN	NaN
1343	0.973	NaN	1.068	NaN	NaN	NaN	NaN	NaN	NaN	NaN	NaN	NaN	NaN	NaN	NaN	NaN	NaN	NaN	NaN	NaN	NaN	NaN	NaN	NaN	NaN
1344	1.019	NaN	1.063	NaN	NaN	NaN	NaN	NaN	NaN	NaN	NaN	NaN	NaN	NaN	NaN	NaN	NaN	NaN	NaN	NaN	NaN	NaN	NaN	NaN	NaN
1345	1.067	NaN	1.14	NaN	NaN	NaN	NaN	NaN	NaN	NaN	NaN	NaN	NaN	NaN	NaN	NaN	NaN	NaN	NaN	NaN	NaN	NaN	NaN	NaN	NaN
1346	0.972	NaN	0.902	NaN	NaN	NaN	NaN	NaN	NaN	NaN	NaN	NaN	NaN	NaN	NaN	NaN	NaN	NaN	NaN	NaN	NaN	NaN	NaN	NaN	NaN
1347	0.909	NaN	0.889	NaN	NaN	NaN	NaN	NaN	NaN	NaN	NaN	NaN	NaN	NaN	NaN	NaN	NaN	NaN	NaN	NaN	NaN	NaN	NaN	NaN	NaN
1348	0.779	NaN	0.777	NaN	NaN	NaN	NaN	NaN	NaN	NaN	NaN	NaN	NaN	NaN	NaN	NaN	NaN	NaN	NaN	NaN	NaN	NaN	NaN	NaN	NaN
1349	0.783	NaN	0.879	NaN	NaN	NaN	NaN	NaN	NaN	NaN	NaN	NaN	NaN	NaN	NaN	NaN	NaN	NaN	NaN	NaN	NaN	NaN	NaN	NaN	NaN
1350	0.737	NaN	0.99	NaN	NaN	NaN	NaN	NaN	NaN	NaN	NaN	NaN	NaN	NaN	NaN	NaN	NaN	NaN	NaN	NaN	NaN	NaN	NaN	NaN	NaN
1351	0.8	NaN	1.024	NaN	NaN	NaN	NaN	NaN	NaN	NaN	NaN	NaN	NaN	NaN	NaN	NaN	NaN	NaN	NaN	NaN	NaN	NaN	NaN	NaN	NaN
1352	0.951	NaN	0.905	NaN	NaN	NaN	NaN	NaN	NaN	NaN	NaN	NaN	NaN	NaN	NaN	NaN	NaN	NaN	NaN	NaN	NaN	NaN	NaN	NaN	NaN
1353	0.823	NaN	0.984	NaN	NaN	NaN	NaN	NaN	NaN	NaN	NaN	NaN	NaN	NaN	NaN	NaN	NaN	NaN	NaN	NaN	NaN	NaN	NaN	NaN	NaN
1354	0.961	NaN	1.033	NaN	NaN	NaN	NaN	NaN	NaN	NaN	NaN	NaN	NaN	NaN	NaN	NaN	NaN	NaN	NaN	NaN	NaN	NaN	NaN	NaN	NaN
1355	0.964	NaN	1.075	NaN	NaN	NaN	NaN	NaN	NaN	NaN	NaN	NaN	NaN	NaN	NaN	NaN	NaN	NaN	NaN	NaN	NaN	NaN	NaN	NaN	NaN
1356	1.033	NaN	1.1	NaN	NaN	NaN	NaN	NaN	NaN	NaN	NaN	NaN	NaN	NaN	NaN	NaN	NaN	NaN	NaN	NaN	NaN	NaN	NaN	NaN	NaN
1357	0.954	NaN	0.983	NaN	NaN	NaN	NaN	NaN	NaN	NaN	NaN	NaN	NaN	NaN	NaN	NaN	NaN	NaN	NaN	NaN	NaN	NaN	NaN	NaN	NaN
1358	0.992	NaN	0.892	NaN	NaN	NaN	NaN	NaN	NaN	NaN	NaN	NaN	NaN	NaN	NaN	NaN	NaN	NaN	NaN	NaN	NaN	NaN	NaN	NaN	NaN
1359	0.967	NaN	1.068	NaN	NaN	NaN	NaN	NaN	NaN	NaN	NaN	NaN	NaN	NaN	NaN	NaN	NaN	NaN	NaN	NaN	NaN	NaN	NaN	NaN	NaN
1360	0.803	NaN	0.955	NaN	NaN	NaN	NaN	NaN	NaN	NaN	NaN	NaN	NaN	NaN	NaN	NaN	NaN	NaN	NaN	NaN	NaN	NaN	NaN	NaN	NaN
1361	0.862	NaN	1.185	NaN	NaN	NaN	NaN	NaN	NaN	NaN	NaN	NaN	NaN	NaN	NaN	NaN	NaN	NaN	NaN	NaN	NaN	NaN	NaN	NaN	NaN
1362	0.938	NaN	1.281	NaN	NaN	NaN	NaN	NaN	NaN	NaN	NaN	NaN	NaN	NaN	NaN	NaN	NaN	NaN	NaN	NaN	NaN	NaN	NaN	NaN	NaN
1363	0.971	NaN	1.221	NaN	NaN	NaN	NaN	NaN	NaN	NaN	NaN	NaN	NaN	NaN	NaN	NaN	NaN	NaN	NaN	NaN	NaN	NaN	NaN	NaN	NaN
1364	0.909	NaN	1.21	NaN	NaN	NaN	NaN	NaN	NaN	NaN	NaN	NaN	NaN	NaN	NaN	NaN	NaN	NaN	NaN	NaN	NaN	NaN	NaN	NaN	NaN
1365	0.874	NaN	1.183	NaN	NaN	NaN	NaN	NaN	NaN	NaN	NaN	NaN	NaN	NaN	NaN	NaN	NaN	NaN	NaN	NaN	NaN	NaN	NaN	NaN	NaN
1366	0.916	NaN	1.255	NaN	NaN	NaN	NaN	NaN	NaN	NaN	NaN	NaN	NaN	NaN	NaN	NaN	NaN	NaN	NaN	NaN	NaN	NaN	NaN	NaN	NaN
1367	0.937	NaN	1.203	NaN	NaN	NaN	NaN	NaN	NaN	NaN	NaN	NaN	NaN	NaN	NaN	NaN	NaN	NaN	NaN	NaN	NaN	NaN	NaN	NaN	NaN
1368	1.017	NaN	1.143	NaN	NaN	NaN	NaN	NaN	NaN	NaN	NaN	NaN	NaN	NaN	NaN	NaN	NaN	NaN	NaN	NaN	NaN	NaN	NaN	NaN	NaN
1369	0.788	NaN	1.092	NaN	NaN	NaN	NaN	NaN	NaN	NaN	NaN	NaN	NaN	NaN	NaN	NaN	NaN	NaN	NaN	NaN	NaN	NaN	NaN	NaN	NaN
1370	0.82	NaN	1.154	NaN	NaN	NaN	NaN	NaN	NaN	NaN	NaN	NaN	NaN	NaN	NaN	NaN	NaN	NaN	NaN	NaN	NaN	NaN	NaN	NaN	NaN
1371	0.925	NaN	1.16	NaN	NaN	NaN	NaN	NaN	NaN	NaN	NaN	NaN	NaN	NaN	NaN	NaN	NaN	NaN	NaN	NaN	NaN	NaN	NaN	NaN	NaN
1372	0.849	NaN	1.105	NaN	NaN	NaN	NaN	NaN	NaN	NaN	NaN	NaN	NaN	NaN	NaN	NaN	NaN	NaN	NaN	NaN	NaN	NaN	NaN	NaN	NaN
1373	0.919	NaN	1.112	NaN	NaN	NaN	NaN	NaN	NaN	NaN	NaN	NaN	NaN	NaN	NaN	NaN	NaN	NaN	NaN	NaN	NaN	NaN	NaN	NaN	NaN
1374	1.096	NaN	1.158	NaN	NaN	NaN	NaN	NaN	NaN	NaN	NaN	NaN	NaN	NaN	NaN	NaN	NaN	NaN	NaN	NaN	NaN	NaN	NaN	NaN	NaN
1375	1.084	NaN	0.964	NaN	NaN	NaN	NaN	NaN	NaN	NaN	NaN	NaN	NaN	NaN	NaN	NaN	NaN	NaN	NaN	NaN	NaN	NaN	NaN	NaN	NaN
1376	1.134	NaN	1.102	NaN	NaN	NaN	NaN	NaN	NaN	NaN	NaN	NaN	NaN	NaN	NaN	NaN	NaN	NaN	NaN	NaN	NaN	NaN	NaN	NaN	NaN
1377	1.014	NaN	1.058	NaN	NaN	NaN	NaN	NaN	NaN	NaN	NaN	NaN	NaN	NaN	NaN	NaN	NaN	NaN	NaN	NaN	NaN	NaN	NaN	NaN	NaN
1378	1.078	NaN	1.179	NaN	NaN	NaN	NaN	NaN	NaN	NaN	NaN	NaN	NaN	NaN	NaN	NaN	NaN	NaN	NaN	NaN	NaN	NaN	NaN	NaN	NaN
1379	0.952	NaN	1.11	NaN	NaN	NaN	NaN	NaN	NaN	NaN	NaN	NaN	NaN	NaN	NaN	NaN	NaN	NaN	NaN	NaN	NaN	NaN	NaN	NaN	NaN
1380	0.989	NaN	1.185	NaN	NaN	NaN	NaN	NaN	NaN	NaN	NaN	NaN	NaN	NaN	NaN	NaN	NaN	NaN	NaN	NaN	NaN	NaN	NaN	NaN	NaN
1381	1.036	NaN	1.159	NaN	NaN	NaN	NaN	NaN	NaN	NaN	NaN	NaN	NaN	NaN	NaN	NaN	NaN	NaN	NaN	NaN	NaN	NaN	NaN	NaN	NaN
1382	1.196	NaN	1.172	NaN	NaN	NaN	NaN	NaN	NaN	NaN	NaN	NaN	NaN	NaN	NaN	NaN	NaN	NaN	NaN	NaN	NaN	NaN	NaN	NaN	NaN
1383	1.14	NaN	1.086	NaN	NaN	NaN	NaN	NaN	NaN	NaN	NaN	NaN	NaN	NaN	NaN	NaN	NaN	NaN	NaN	NaN	NaN	NaN	NaN	NaN	NaN
1384	1.149	NaN	1.238	NaN	NaN	NaN	NaN	NaN	NaN	NaN	NaN	NaN	NaN	NaN	NaN	NaN	NaN	NaN	NaN	NaN	NaN	NaN	NaN	NaN	NaN
1385	1.12	NaN	0.964	NaN	NaN	NaN	NaN	NaN	NaN	NaN	NaN	NaN	NaN	NaN	NaN	NaN	NaN	NaN	NaN	NaN	NaN	NaN	NaN	NaN	NaN
1386	1.087	NaN	1.095	NaN	NaN	NaN	NaN	NaN	NaN	NaN	NaN	NaN	NaN	NaN	NaN	NaN	NaN	NaN	NaN	NaN	NaN	NaN	NaN	NaN	NaN
1387	1.01	NaN	1.113	NaN	NaN	NaN	NaN	NaN	NaN	NaN	NaN	NaN	NaN	NaN	NaN	NaN	NaN	NaN	NaN	NaN	NaN	NaN	NaN	NaN	NaN
1388	0.838	NaN	1.054	NaN	NaN	NaN	NaN	NaN	NaN	NaN	NaN	NaN	NaN	NaN	NaN	NaN	NaN	NaN	NaN	NaN	NaN	NaN	NaN	NaN	NaN
1389	0.874	NaN	0.938	NaN	NaN	NaN	NaN	NaN	NaN	NaN	NaN	NaN	NaN	NaN	NaN	NaN	NaN	NaN	NaN	NaN	NaN	NaN	NaN	NaN	NaN
1390	0.962	NaN	0.972	NaN	NaN	NaN	NaN	NaN	NaN	NaN	NaN	NaN	NaN	NaN	NaN	NaN	NaN	NaN	NaN	NaN	NaN	NaN	NaN	NaN	NaN
1391	0.796	NaN	0.725	NaN	NaN	NaN	NaN	NaN	NaN	NaN	NaN	NaN	NaN	NaN	NaN	NaN	NaN	NaN	NaN	NaN	NaN	NaN	NaN	NaN	NaN
1392	0.769	NaN	0.831	NaN	NaN	NaN	NaN	NaN	NaN	NaN	NaN	NaN	NaN	NaN	NaN	NaN	NaN	NaN	NaN	NaN	NaN	NaN	NaN	NaN	NaN
1393	0.924	NaN	0.963	NaN	NaN	NaN	NaN	NaN	NaN	NaN	NaN	NaN	NaN	NaN	NaN	NaN	NaN	NaN	NaN	NaN	NaN	NaN	NaN	NaN	NaN
1394	0.922	NaN	0.884	NaN	NaN	NaN	NaN	NaN	NaN	NaN	NaN	NaN	NaN	NaN	NaN	NaN	NaN	NaN	NaN	NaN	NaN	NaN	NaN	NaN	NaN
1395	0.885	NaN	1.095	NaN	NaN	NaN	NaN	NaN	NaN	NaN	NaN	NaN	NaN	NaN	NaN	NaN	NaN	NaN	NaN	NaN	NaN	NaN	NaN	NaN	NaN
1396	0.844	NaN	1.231	NaN	NaN	NaN	NaN	NaN	NaN	NaN	NaN	NaN	NaN	NaN	NaN	NaN	NaN	NaN	NaN	NaN	NaN	NaN	NaN	NaN	NaN
1397	0.87	NaN	1.111	NaN	NaN	NaN	NaN	NaN	NaN	NaN	NaN	NaN	NaN	NaN	NaN	NaN	NaN	NaN	NaN	NaN	NaN	NaN	NaN	NaN	NaN
1398	0.951	NaN	1.136	NaN	NaN	NaN	NaN	NaN	NaN	NaN	NaN	NaN	NaN	NaN	NaN	NaN	NaN	NaN	NaN	NaN	NaN	NaN	NaN	NaN	NaN
1399	0.983	NaN	1.121	NaN	NaN	NaN	NaN	NaN	NaN	NaN	NaN	NaN	NaN	NaN	NaN	NaN	NaN	NaN	NaN	NaN	NaN	NaN	NaN	NaN	NaN
1400	1.013	NaN	1.122	NaN	NaN	NaN	NaN	NaN	NaN	NaN	NaN	NaN	NaN	NaN	NaN	NaN	NaN	NaN	NaN	NaN	NaN	NaN	NaN	NaN	NaN
1401	0.931	NaN	1.068	NaN	NaN	NaN	NaN	NaN	NaN	NaN	NaN	NaN	NaN	NaN	NaN	NaN	NaN	NaN	NaN	NaN	NaN	NaN	NaN	NaN	NaN
1402	0.979	NaN	0.942	NaN	NaN	NaN	NaN	NaN	NaN	NaN	NaN	NaN	NaN	NaN	NaN	NaN	NaN	NaN	NaN	NaN	NaN	NaN	NaN	NaN	NaN
1403	1.038	NaN	1.045	NaN	NaN	NaN	NaN	NaN	NaN	NaN	NaN	NaN	NaN	NaN	NaN	NaN	NaN	NaN	NaN	NaN	NaN	NaN	NaN	NaN	NaN
1404	1.041	NaN	1.01	NaN	NaN	NaN	NaN	NaN	NaN	NaN	NaN	NaN	NaN	NaN	NaN	NaN	NaN	NaN	NaN	NaN	NaN	NaN	NaN	NaN	NaN
1405	1.163	NaN	1.187	NaN	NaN	NaN	NaN	NaN	NaN	NaN	NaN	NaN	NaN	NaN	NaN	NaN	NaN	NaN	NaN	NaN	NaN	NaN	NaN	NaN	NaN
1406	1.237	NaN	1.197	NaN	NaN	NaN	NaN	NaN	NaN	NaN	NaN	NaN	NaN	NaN	NaN	NaN	NaN	NaN	NaN	NaN	NaN	NaN	NaN	NaN	NaN
1407	1.035	NaN	1.068	NaN	NaN	NaN	NaN	NaN	NaN	NaN	NaN	NaN	NaN	NaN	NaN	NaN	NaN	NaN	NaN	NaN	NaN	NaN	NaN	NaN	NaN
1408	0.667	NaN	1.053	NaN	NaN	NaN	NaN	NaN	NaN	NaN	NaN	NaN	NaN	NaN	NaN	NaN	NaN	NaN	NaN	NaN	NaN	NaN	NaN	NaN	NaN
1409	0.792	NaN	1.053	NaN	NaN	NaN	NaN	NaN	NaN	NaN	NaN	NaN	NaN	NaN	NaN	NaN	NaN	NaN	NaN	NaN	NaN	NaN	NaN	NaN	NaN
1410	0.927	NaN	0.957	NaN	NaN	NaN	NaN	NaN	NaN	NaN	NaN	NaN	NaN	NaN	NaN	NaN	NaN	NaN	NaN	NaN	NaN	NaN	NaN	NaN	NaN
1411	0.866	NaN	1.015	NaN	NaN	NaN	NaN	NaN	NaN	NaN	NaN	NaN	NaN	NaN	NaN	NaN	NaN	NaN	NaN	NaN	NaN	NaN	NaN	NaN	NaN
1412	0.944	NaN	0.995	NaN	NaN	NaN	NaN	NaN	NaN	NaN	NaN	NaN	NaN	NaN	NaN	NaN	NaN	NaN	NaN	NaN	NaN	NaN	NaN	NaN	NaN
1413	1.078	NaN	1.168	NaN	NaN	NaN	NaN	NaN	NaN	NaN	NaN	NaN	NaN	NaN	NaN	NaN	NaN	NaN	NaN	NaN	NaN	NaN	NaN	NaN	NaN
1414	1.025	NaN	1.004	NaN	NaN	NaN	NaN	NaN	NaN	NaN	NaN	NaN	NaN	NaN	NaN	NaN	NaN	NaN	NaN	NaN	NaN	NaN	NaN	NaN	NaN
1415	1.033	NaN	0.906	NaN	NaN	NaN	NaN	NaN	NaN	NaN	NaN	NaN	NaN	NaN	NaN	NaN	NaN	NaN	NaN	NaN	NaN	NaN	NaN	NaN	NaN
1416	0.981	NaN	0.783	NaN	NaN	NaN	NaN	NaN	NaN	NaN	NaN	NaN	NaN	NaN	NaN	NaN	NaN	NaN	NaN	NaN	NaN	NaN	NaN	NaN	NaN
1417	1.094	NaN	0.853	NaN	NaN	NaN	NaN	NaN	NaN	NaN	NaN	NaN	NaN	NaN	NaN	NaN	NaN	NaN	NaN	NaN	NaN	NaN	NaN	NaN	NaN
1418	1.013	NaN	0.865	NaN	NaN	NaN	NaN	NaN	NaN	NaN	NaN	NaN	NaN	NaN	NaN	NaN	NaN	NaN	NaN	NaN	NaN	NaN	NaN	NaN	NaN
1419	0.996	NaN	0.983	NaN	NaN	NaN	NaN	NaN	NaN	NaN	NaN	NaN	NaN	NaN	NaN	NaN	NaN	NaN	NaN	NaN	NaN	NaN	NaN	NaN	NaN
1420	0.994	NaN	0.852	NaN	NaN	NaN	NaN	NaN	NaN	NaN	NaN	NaN	NaN	NaN	NaN	NaN	NaN	NaN	NaN	NaN	NaN	NaN	NaN	NaN	NaN
1421	1.081	NaN	1	NaN	NaN	NaN	NaN	NaN	NaN	NaN	NaN	NaN	NaN	NaN	NaN	NaN	NaN	NaN	NaN	NaN	NaN	NaN	NaN	NaN	NaN
1422	0.954	NaN	0.852	NaN	NaN	NaN	NaN	NaN	NaN	NaN	NaN	NaN	NaN	NaN	NaN	NaN	NaN	NaN	NaN	NaN	NaN	NaN	NaN	NaN	NaN
1423	0.999	NaN	0.839	NaN	NaN	NaN	NaN	NaN	NaN	NaN	NaN	NaN	NaN	NaN	NaN	NaN	NaN	NaN	NaN	NaN	NaN	NaN	NaN	NaN	NaN
1424	0.986	NaN	0.846	NaN	NaN	NaN	NaN	NaN	NaN	NaN	NaN	NaN	NaN	NaN	NaN	NaN	NaN	NaN	NaN	NaN	NaN	NaN	NaN	NaN	NaN
1425	0.963	NaN	0.574	NaN	NaN	NaN	NaN	NaN	NaN	NaN	NaN	NaN	NaN	NaN	NaN	NaN	NaN	NaN	NaN	NaN	NaN	NaN	NaN	NaN	NaN
1426	1.007	NaN	0.783	NaN	NaN	NaN	NaN	NaN	NaN	NaN	NaN	NaN	NaN	NaN	NaN	NaN	NaN	NaN	NaN	NaN	NaN	NaN	NaN	NaN	NaN
1427	0.971	NaN	1.029	NaN	NaN	NaN	NaN	NaN	NaN	NaN	NaN	NaN	NaN	NaN	NaN	NaN	NaN	NaN	NaN	NaN	NaN	NaN	NaN	NaN	NaN
1428	1.001	NaN	1.03	NaN	NaN	NaN	NaN	NaN	NaN	NaN	NaN	NaN	NaN	NaN	NaN	NaN	NaN	NaN	NaN	NaN	NaN	NaN	NaN	NaN	NaN
1429	0.961	NaN	0.94	NaN	NaN	NaN	NaN	NaN	NaN	NaN	NaN	NaN	NaN	NaN	NaN	NaN	NaN	NaN	NaN	NaN	NaN	NaN	NaN	NaN	NaN
1430	1.048	NaN	1.23	NaN	NaN	NaN	NaN	NaN	NaN	NaN	NaN	NaN	NaN	NaN	NaN	NaN	NaN	NaN	NaN	NaN	NaN	NaN	NaN	NaN	NaN
1431	1.152	NaN	1.246	NaN	NaN	NaN	NaN	NaN	NaN	NaN	NaN	NaN	NaN	NaN	NaN	NaN	NaN	NaN	NaN	NaN	NaN	NaN	NaN	NaN	NaN
1432	1.053	NaN	1.189	NaN	NaN	NaN	NaN	NaN	NaN	NaN	NaN	NaN	NaN	NaN	NaN	NaN	NaN	NaN	NaN	NaN	NaN	NaN	NaN	NaN	NaN
1433	1.243	NaN	1.122	NaN	NaN	NaN	NaN	NaN	NaN	NaN	NaN	NaN	NaN	NaN	NaN	NaN	NaN	NaN	NaN	NaN	NaN	NaN	NaN	NaN	NaN
1434	1.457	NaN	1.229	NaN	NaN	NaN	NaN	NaN	NaN	NaN	NaN	NaN	NaN	NaN	NaN	NaN	NaN	NaN	NaN	NaN	NaN	NaN	NaN	NaN	NaN
1435	1.359	NaN	1.026	NaN	NaN	NaN	NaN	NaN	NaN	NaN	NaN	NaN	NaN	NaN	NaN	NaN	NaN	NaN	NaN	NaN	NaN	NaN	NaN	NaN	NaN
1436	1.365	NaN	1.001	NaN	NaN	NaN	NaN	NaN	NaN	NaN	NaN	NaN	NaN	NaN	NaN	NaN	NaN	NaN	NaN	NaN	NaN	NaN	NaN	NaN	NaN
1437	1.279	NaN	0.867	NaN	NaN	NaN	NaN	NaN	NaN	NaN	NaN	NaN	NaN	NaN	NaN	NaN	NaN	NaN	NaN	NaN	NaN	NaN	NaN	NaN	NaN
1438	1.147	NaN	0.797	NaN	NaN	NaN	NaN	NaN	NaN	NaN	NaN	NaN	NaN	NaN	NaN	NaN	NaN	NaN	NaN	NaN	NaN	NaN	NaN	NaN	NaN
1439	1.194	NaN	0.89	NaN	NaN	NaN	NaN	NaN	NaN	NaN	NaN	NaN	NaN	NaN	NaN	NaN	NaN	NaN	NaN	NaN	NaN	NaN	NaN	NaN	NaN
1440	1.134	NaN	0.982	NaN	NaN	NaN	NaN	NaN	NaN	NaN	NaN	NaN	NaN	NaN	NaN	NaN	NaN	NaN	NaN	NaN	NaN	NaN	NaN	NaN	NaN
1441	1.145	NaN	0.882	NaN	NaN	NaN	NaN	NaN	NaN	NaN	NaN	NaN	NaN	NaN	NaN	NaN	NaN	NaN	NaN	NaN	NaN	NaN	NaN	NaN	NaN
1442	1.184	NaN	0.913	NaN	NaN	NaN	NaN	NaN	NaN	NaN	NaN	NaN	NaN	NaN	NaN	NaN	NaN	NaN	NaN	NaN	NaN	NaN	NaN	NaN	NaN
1443	1.101	NaN	0.953	NaN	NaN	NaN	NaN	NaN	NaN	NaN	NaN	NaN	NaN	NaN	NaN	NaN	NaN	NaN	NaN	NaN	NaN	NaN	NaN	NaN	NaN
1444	0.996	NaN	0.921	NaN	NaN	NaN	NaN	NaN	NaN	NaN	NaN	NaN	NaN	NaN	NaN	NaN	NaN	NaN	NaN	NaN	NaN	NaN	NaN	NaN	NaN
1445	1.076	NaN	0.929	NaN	NaN	NaN	NaN	NaN	NaN	NaN	NaN	NaN	NaN	NaN	NaN	NaN	NaN	NaN	NaN	NaN	NaN	NaN	NaN	NaN	NaN
1446	1.058	NaN	0.86	NaN	NaN	NaN	NaN	NaN	NaN	NaN	NaN	NaN	NaN	NaN	NaN	NaN	NaN	NaN	NaN	NaN	NaN	NaN	NaN	NaN	NaN
1447	1.075	NaN	0.914	NaN	NaN	NaN	NaN	NaN	NaN	NaN	NaN	NaN	NaN	NaN	NaN	NaN	NaN	NaN	NaN	NaN	NaN	NaN	NaN	NaN	NaN
1448	0.997	NaN	0.988	NaN	NaN	NaN	NaN	NaN	NaN	NaN	NaN	NaN	NaN	NaN	NaN	NaN	NaN	NaN	NaN	NaN	NaN	NaN	NaN	NaN	NaN
1449	1.031	NaN	0.961	NaN	NaN	NaN	NaN	NaN	NaN	NaN	NaN	NaN	NaN	NaN	NaN	NaN	NaN	NaN	NaN	NaN	NaN	NaN	NaN	NaN	NaN
1450	0.939	NaN	1.002	NaN	NaN	NaN	NaN	NaN	NaN	NaN	NaN	NaN	NaN	NaN	NaN	NaN	NaN	NaN	NaN	NaN	NaN	NaN	NaN	NaN	NaN
1451	1.145	NaN	1.074	NaN	NaN	NaN	NaN	NaN	NaN	NaN	NaN	NaN	NaN	NaN	NaN	NaN	NaN	NaN	NaN	NaN	NaN	NaN	NaN	NaN	NaN
1452	1.162	NaN	0.897	NaN	NaN	NaN	NaN	NaN	NaN	NaN	NaN	NaN	NaN	NaN	NaN	NaN	NaN	NaN	NaN	NaN	NaN	NaN	NaN	NaN	NaN
1453	1.118	NaN	0.882	NaN	NaN	NaN	NaN	NaN	NaN	NaN	NaN	NaN	NaN	NaN	NaN	NaN	NaN	NaN	NaN	NaN	NaN	NaN	NaN	NaN	NaN
1454	1.016	NaN	0.943	NaN	NaN	NaN	NaN	NaN	NaN	NaN	NaN	NaN	NaN	NaN	NaN	NaN	NaN	NaN	NaN	NaN	NaN	NaN	NaN	NaN	NaN
1455	1.027	NaN	0.741	NaN	NaN	NaN	NaN	NaN	NaN	NaN	NaN	NaN	NaN	NaN	NaN	NaN	NaN	NaN	NaN	NaN	NaN	NaN	NaN	NaN	NaN
1456	0.985	NaN	0.839	NaN	NaN	NaN	NaN	NaN	NaN	NaN	NaN	NaN	NaN	NaN	NaN	NaN	NaN	NaN	NaN	NaN	NaN	NaN	NaN	NaN	NaN
1457	1.005	NaN	0.673	NaN	NaN	NaN	NaN	NaN	NaN	NaN	NaN	NaN	NaN	NaN	NaN	NaN	NaN	NaN	NaN	NaN	NaN	NaN	NaN	NaN	NaN
1458	1.08	NaN	0.729	NaN	NaN	NaN	NaN	NaN	NaN	NaN	NaN	NaN	NaN	NaN	NaN	NaN	NaN	NaN	NaN	NaN	NaN	NaN	NaN	NaN	NaN
1459	1.096	NaN	0.646	NaN	NaN	NaN	NaN	NaN	NaN	NaN	NaN	NaN	NaN	NaN	NaN	NaN	NaN	NaN	NaN	NaN	NaN	NaN	NaN	NaN	NaN
1460	0.989	NaN	0.713	NaN	NaN	NaN	NaN	NaN	NaN	NaN	NaN	NaN	NaN	NaN	NaN	NaN	NaN	NaN	NaN	NaN	NaN	NaN	NaN	NaN	NaN
1461	1.011	NaN	0.783	NaN	NaN	NaN	NaN	NaN	NaN	NaN	NaN	NaN	NaN	NaN	NaN	NaN	NaN	NaN	NaN	NaN	NaN	NaN	NaN	NaN	NaN
1462	1.014	NaN	0.922	NaN	NaN	NaN	NaN	NaN	NaN	NaN	NaN	NaN	NaN	NaN	NaN	NaN	NaN	NaN	NaN	NaN	NaN	NaN	NaN	NaN	NaN
1463	0.895	NaN	0.916	NaN	NaN	NaN	NaN	NaN	NaN	NaN	NaN	NaN	NaN	NaN	NaN	NaN	NaN	NaN	NaN	NaN	NaN	NaN	NaN	NaN	NaN
1464	0.919	NaN	0.859	NaN	NaN	NaN	NaN	NaN	NaN	NaN	NaN	NaN	NaN	NaN	NaN	NaN	NaN	NaN	NaN	NaN	NaN	NaN	NaN	NaN	NaN
1465	0.836	NaN	0.929	NaN	NaN	NaN	NaN	NaN	NaN	NaN	NaN	NaN	NaN	NaN	NaN	NaN	NaN	NaN	NaN	NaN	NaN	NaN	NaN	NaN	NaN
1466	0.806	NaN	0.83	NaN	NaN	NaN	NaN	NaN	NaN	NaN	NaN	NaN	NaN	NaN	NaN	NaN	NaN	NaN	NaN	NaN	NaN	NaN	NaN	NaN	NaN
1467	0.833	NaN	0.831	NaN	NaN	NaN	NaN	NaN	NaN	NaN	NaN	NaN	NaN	NaN	NaN	NaN	NaN	NaN	NaN	NaN	NaN	NaN	NaN	NaN	NaN
1468	0.964	NaN	0.677	NaN	NaN	NaN	NaN	NaN	NaN	NaN	NaN	NaN	NaN	NaN	NaN	NaN	NaN	NaN	NaN	NaN	NaN	NaN	NaN	NaN	NaN
1469	1.001	NaN	0.854	NaN	NaN	NaN	NaN	NaN	NaN	NaN	NaN	NaN	NaN	NaN	NaN	NaN	NaN	NaN	NaN	NaN	NaN	NaN	NaN	NaN	NaN
1470	0.864	NaN	0.85	NaN	NaN	NaN	NaN	NaN	NaN	NaN	NaN	NaN	NaN	NaN	NaN	NaN	NaN	NaN	NaN	NaN	NaN	NaN	NaN	NaN	NaN
1471	0.862	NaN	0.869	NaN	NaN	NaN	NaN	NaN	NaN	NaN	NaN	NaN	NaN	NaN	NaN	NaN	NaN	NaN	NaN	NaN	NaN	NaN	NaN	NaN	NaN
1472	0.809	NaN	0.971	NaN	NaN	NaN	NaN	NaN	NaN	NaN	NaN	NaN	NaN	NaN	NaN	NaN	NaN	NaN	NaN	NaN	NaN	NaN	NaN	NaN	NaN
1473	0.905	NaN	0.926	NaN	NaN	NaN	NaN	NaN	NaN	NaN	NaN	NaN	NaN	NaN	NaN	NaN	NaN	NaN	NaN	NaN	NaN	NaN	NaN	NaN	NaN
1474	0.922	NaN	1.074	NaN	NaN	NaN	NaN	NaN	NaN	NaN	NaN	NaN	NaN	NaN	NaN	NaN	NaN	NaN	NaN	NaN	NaN	NaN	NaN	NaN	NaN
1475	0.822	NaN	1.002	NaN	NaN	NaN	NaN	NaN	NaN	NaN	NaN	NaN	NaN	NaN	NaN	NaN	NaN	NaN	NaN	NaN	NaN	NaN	NaN	NaN	NaN
1476	0.762	NaN	0.919	NaN	NaN	NaN	NaN	NaN	NaN	NaN	NaN	NaN	NaN	NaN	NaN	NaN	NaN	NaN	NaN	NaN	NaN	NaN	NaN	NaN	NaN
1477	0.609	NaN	0.865	NaN	NaN	NaN	NaN	NaN	NaN	NaN	NaN	NaN	NaN	NaN	NaN	NaN	NaN	NaN	NaN	NaN	NaN	NaN	NaN	NaN	NaN
1478	0.588	0.675	0.99	NaN	NaN	NaN	NaN	NaN	NaN	NaN	NaN	NaN	NaN	NaN	NaN	NaN	NaN	NaN	NaN	NaN	NaN	NaN	NaN	NaN	NaN
1479	0.635	0.669	1.004	NaN	NaN	NaN	NaN	NaN	NaN	NaN	NaN	NaN	NaN	NaN	NaN	NaN	NaN	NaN	NaN	NaN	NaN	NaN	NaN	NaN	NaN
1480	0.798	0.842	1.147	NaN	NaN	NaN	NaN	NaN	NaN	NaN	NaN	NaN	NaN	NaN	NaN	NaN	NaN	NaN	NaN	NaN	NaN	NaN	NaN	NaN	NaN
1481	0.854	0.999	1.131	NaN	NaN	NaN	NaN	NaN	NaN	NaN	NaN	NaN	NaN	NaN	NaN	NaN	NaN	NaN	NaN	NaN	NaN	NaN	NaN	NaN	NaN
1482	0.993	0.927	1.027	NaN	NaN	NaN	NaN	NaN	NaN	NaN	NaN	NaN	NaN	NaN	NaN	NaN	NaN	NaN	NaN	NaN	NaN	NaN	NaN	NaN	NaN
1483	0.913	0.784	0.958	NaN	NaN	NaN	NaN	NaN	NaN	NaN	NaN	NaN	NaN	NaN	NaN	NaN	NaN	NaN	NaN	NaN	NaN	NaN	NaN	NaN	NaN
1484	0.945	0.928	0.905	NaN	NaN	NaN	NaN	NaN	NaN	NaN	NaN	NaN	NaN	NaN	NaN	NaN	NaN	NaN	NaN	NaN	NaN	NaN	NaN	NaN	NaN
1485	0.945	0.812	1.033	NaN	NaN	NaN	NaN	NaN	NaN	NaN	NaN	NaN	NaN	NaN	NaN	NaN	NaN	NaN	NaN	NaN	NaN	NaN	NaN	NaN	NaN
1486	1.103	0.883	1.073	NaN	NaN	NaN	NaN	NaN	NaN	NaN	NaN	NaN	NaN	NaN	NaN	NaN	NaN	NaN	NaN	NaN	NaN	NaN	NaN	NaN	NaN
1487	1.086	0.969	1.052	NaN	NaN	NaN	NaN	NaN	NaN	NaN	NaN	NaN	NaN	NaN	NaN	NaN	NaN	NaN	NaN	NaN	NaN	NaN	NaN	NaN	NaN
1488	1.058	0.989	1.023	NaN	NaN	NaN	NaN	NaN	NaN	NaN	NaN	NaN	NaN	NaN	NaN	NaN	NaN	NaN	NaN	NaN	NaN	NaN	NaN	NaN	NaN
1489	0.912	1.22	1	NaN	NaN	NaN	NaN	NaN	NaN	NaN	NaN	NaN	NaN	NaN	NaN	NaN	NaN	NaN	NaN	NaN	NaN	NaN	NaN	NaN	NaN
1490	0.934	0.97	0.886	NaN	NaN	NaN	NaN	NaN	NaN	NaN	NaN	NaN	NaN	NaN	NaN	NaN	NaN	NaN	NaN	NaN	NaN	NaN	NaN	NaN	NaN
1491	1.058	0.948	0.792	NaN	NaN	NaN	NaN	NaN	NaN	NaN	NaN	NaN	NaN	NaN	NaN	NaN	NaN	NaN	NaN	NaN	NaN	NaN	NaN	NaN	NaN
1492	1.133	0.98	0.793	NaN	NaN	NaN	NaN	NaN	NaN	NaN	NaN	NaN	NaN	NaN	NaN	NaN	NaN	NaN	NaN	NaN	NaN	NaN	NaN	NaN	NaN
1493	1.07	0.718	0.929	NaN	NaN	NaN	NaN	NaN	NaN	NaN	NaN	NaN	NaN	NaN	NaN	NaN	NaN	NaN	NaN	NaN	NaN	NaN	NaN	NaN	NaN
1494	1.016	0.45	0.815	NaN	NaN	NaN	NaN	NaN	NaN	NaN	NaN	NaN	NaN	NaN	NaN	NaN	NaN	NaN	NaN	NaN	NaN	NaN	NaN	NaN	NaN
1495	1.174	0.606	0.865	NaN	NaN	NaN	NaN	NaN	NaN	NaN	NaN	NaN	NaN	NaN	NaN	NaN	NaN	NaN	NaN	NaN	NaN	NaN	NaN	NaN	NaN
1496	1.078	0.6	0.836	NaN	NaN	NaN	NaN	NaN	NaN	NaN	NaN	NaN	NaN	NaN	NaN	NaN	NaN	NaN	NaN	NaN	NaN	NaN	NaN	NaN	NaN
1497	1.179	0.858	0.93	NaN	NaN	NaN	NaN	NaN	NaN	NaN	NaN	NaN	NaN	NaN	NaN	NaN	NaN	NaN	NaN	NaN	NaN	NaN	NaN	NaN	NaN
1498	1.207	0.896	0.996	NaN	NaN	NaN	NaN	NaN	NaN	NaN	NaN	NaN	NaN	NaN	NaN	NaN	NaN	NaN	NaN	NaN	NaN	NaN	NaN	NaN	NaN
1499	1.046	0.859	0.952	NaN	NaN	NaN	NaN	NaN	NaN	NaN	NaN	NaN	NaN	NaN	NaN	NaN	NaN	NaN	NaN	NaN	NaN	NaN	NaN	NaN	NaN
1500	1.065	0.986	0.904	NaN	NaN	NaN	NaN	NaN	NaN	NaN	NaN	NaN	NaN	NaN	NaN	NaN	NaN	NaN	NaN	NaN	NaN	NaN	NaN	NaN	NaN
1501	1.075	0.859	1.012	NaN	NaN	NaN	NaN	NaN	NaN	NaN	NaN	NaN	NaN	NaN	NaN	NaN	NaN	NaN	NaN	NaN	NaN	NaN	NaN	NaN	NaN
1502	1.131	0.84	0.962	NaN	NaN	NaN	NaN	NaN	NaN	NaN	NaN	NaN	NaN	NaN	NaN	NaN	NaN	NaN	NaN	NaN	NaN	NaN	NaN	NaN	NaN
1503	1.117	0.92	0.921	NaN	NaN	NaN	NaN	NaN	NaN	NaN	NaN	NaN	NaN	NaN	NaN	NaN	NaN	NaN	NaN	NaN	NaN	NaN	NaN	NaN	NaN
1504	1.13	0.752	0.884	NaN	NaN	NaN	NaN	NaN	NaN	NaN	NaN	NaN	NaN	NaN	NaN	NaN	NaN	NaN	NaN	NaN	NaN	NaN	NaN	NaN	NaN
1505	1.144	0.94	1.064	NaN	NaN	NaN	NaN	NaN	NaN	NaN	NaN	NaN	NaN	NaN	NaN	NaN	NaN	NaN	NaN	NaN	NaN	NaN	NaN	NaN	NaN
1506	1.154	0.881	1.077	NaN	NaN	NaN	NaN	NaN	NaN	NaN	NaN	NaN	NaN	NaN	NaN	NaN	NaN	NaN	NaN	NaN	NaN	NaN	NaN	NaN	NaN
1507	1.3	0.938	1.17	NaN	NaN	NaN	NaN	NaN	NaN	NaN	NaN	NaN	NaN	NaN	NaN	NaN	NaN	NaN	NaN	NaN	NaN	NaN	NaN	NaN	NaN
1508	1.363	0.933	1.089	NaN	NaN	NaN	NaN	NaN	NaN	NaN	NaN	NaN	NaN	NaN	NaN	NaN	NaN	NaN	NaN	NaN	NaN	NaN	NaN	NaN	NaN
1509	1.201	1.065	1.056	NaN	NaN	NaN	NaN	NaN	NaN	NaN	NaN	NaN	NaN	NaN	NaN	NaN	NaN	NaN	NaN	NaN	NaN	NaN	NaN	NaN	NaN
1510	1.216	1.163	1.156	NaN	NaN	NaN	NaN	NaN	NaN	NaN	NaN	NaN	NaN	NaN	NaN	NaN	NaN	NaN	NaN	NaN	NaN	NaN	NaN	NaN	NaN
1511	1.188	0.955	1.124	NaN	NaN	NaN	NaN	NaN	NaN	NaN	NaN	NaN	NaN	NaN	NaN	NaN	NaN	NaN	NaN	NaN	NaN	NaN	NaN	NaN	NaN
1512	1.3	0.921	1.162	NaN	NaN	NaN	NaN	NaN	NaN	NaN	NaN	NaN	NaN	NaN	NaN	NaN	NaN	NaN	NaN	NaN	NaN	NaN	NaN	NaN	NaN
1513	1.22	0.767	1.254	NaN	NaN	NaN	NaN	NaN	NaN	NaN	NaN	NaN	NaN	NaN	NaN	NaN	NaN	NaN	NaN	NaN	NaN	NaN	NaN	NaN	NaN
1514	1.089	0.615	1.086	NaN	NaN	NaN	NaN	NaN	NaN	NaN	NaN	NaN	NaN	NaN	NaN	NaN	NaN	NaN	NaN	NaN	NaN	NaN	NaN	NaN	NaN
1515	1.074	0.673	1.098	NaN	NaN	NaN	NaN	NaN	NaN	NaN	NaN	NaN	NaN	NaN	NaN	NaN	NaN	NaN	NaN	NaN	NaN	NaN	NaN	NaN	NaN
1516	1.068	0.718	1.014	NaN	NaN	NaN	NaN	NaN	NaN	NaN	NaN	NaN	NaN	NaN	NaN	NaN	NaN	NaN	NaN	NaN	NaN	NaN	NaN	NaN	NaN
1517	1.118	0.747	1.162	NaN	NaN	NaN	NaN	NaN	NaN	NaN	NaN	NaN	NaN	NaN	NaN	NaN	NaN	NaN	NaN	NaN	NaN	NaN	NaN	NaN	NaN
1518	1.039	0.792	1.113	NaN	NaN	NaN	NaN	NaN	NaN	NaN	NaN	NaN	NaN	NaN	NaN	NaN	NaN	NaN	NaN	NaN	NaN	NaN	NaN	NaN	NaN
1519	0.951	0.973	1.046	NaN	NaN	NaN	NaN	NaN	NaN	NaN	NaN	NaN	NaN	NaN	NaN	NaN	NaN	NaN	NaN	NaN	NaN	NaN	NaN	NaN	NaN
1520	0.992	0.949	0.945	NaN	NaN	NaN	NaN	NaN	NaN	NaN	NaN	NaN	NaN	NaN	NaN	NaN	NaN	NaN	NaN	NaN	NaN	NaN	NaN	NaN	NaN
1521	1.154	1.069	0.942	NaN	NaN	NaN	NaN	NaN	NaN	NaN	NaN	NaN	NaN	NaN	NaN	NaN	NaN	NaN	NaN	NaN	NaN	NaN	NaN	NaN	NaN
1522	1.194	0.892	0.907	NaN	NaN	NaN	NaN	NaN	NaN	NaN	NaN	NaN	NaN	NaN	NaN	NaN	NaN	NaN	NaN	NaN	NaN	NaN	NaN	NaN	NaN
1523	1.057	0.636	0.746	NaN	NaN	NaN	NaN	NaN	NaN	NaN	NaN	NaN	NaN	NaN	NaN	NaN	NaN	NaN	NaN	NaN	NaN	NaN	NaN	NaN	NaN
1524	0.971	0.991	0.986	NaN	NaN	NaN	NaN	NaN	NaN	NaN	NaN	NaN	NaN	NaN	NaN	NaN	NaN	NaN	NaN	NaN	NaN	NaN	NaN	NaN	NaN
1525	1.012	0.903	1.118	NaN	NaN	NaN	NaN	NaN	NaN	NaN	NaN	NaN	NaN	NaN	NaN	NaN	NaN	NaN	NaN	NaN	NaN	NaN	NaN	NaN	NaN
1526	1.096	1.006	1.174	NaN	NaN	NaN	NaN	NaN	NaN	NaN	NaN	NaN	NaN	NaN	NaN	NaN	NaN	NaN	NaN	NaN	NaN	NaN	NaN	NaN	NaN
1527	0.978	0.937	1.045	NaN	NaN	NaN	NaN	NaN	NaN	NaN	NaN	NaN	NaN	NaN	NaN	NaN	NaN	NaN	NaN	NaN	NaN	NaN	NaN	NaN	NaN
1528	1.085	0.887	1.122	NaN	NaN	NaN	NaN	NaN	NaN	NaN	NaN	NaN	NaN	NaN	NaN	NaN	NaN	NaN	NaN	NaN	NaN	NaN	NaN	NaN	NaN
1529	1.133	0.924	0.997	NaN	NaN	NaN	NaN	NaN	NaN	NaN	NaN	NaN	NaN	NaN	NaN	NaN	NaN	NaN	NaN	NaN	NaN	NaN	NaN	NaN	NaN
1530	1.025	0.89	1.162	NaN	NaN	NaN	NaN	NaN	NaN	NaN	NaN	NaN	NaN	NaN	NaN	NaN	NaN	NaN	NaN	NaN	NaN	NaN	NaN	NaN	NaN
1531	0.992	0.674	0.936	NaN	NaN	NaN	NaN	NaN	NaN	NaN	NaN	NaN	NaN	NaN	NaN	NaN	NaN	NaN	NaN	NaN	NaN	NaN	NaN	NaN	NaN
1532	0.991	0.619	0.853	NaN	NaN	NaN	NaN	NaN	NaN	NaN	NaN	NaN	NaN	NaN	NaN	NaN	NaN	NaN	NaN	NaN	NaN	NaN	NaN	NaN	NaN
1533	0.924	0.57	1.018	NaN	NaN	NaN	NaN	NaN	NaN	NaN	NaN	NaN	NaN	NaN	NaN	NaN	NaN	NaN	NaN	NaN	NaN	NaN	NaN	NaN	NaN
1534	1.204	0.828	1.031	NaN	NaN	NaN	NaN	NaN	NaN	NaN	NaN	NaN	NaN	NaN	NaN	NaN	NaN	NaN	NaN	NaN	NaN	NaN	NaN	NaN	NaN
1535	1.384	0.689	0.988	NaN	NaN	NaN	NaN	NaN	NaN	NaN	NaN	NaN	NaN	NaN	NaN	NaN	NaN	NaN	NaN	NaN	NaN	NaN	NaN	NaN	NaN
1536	1.362	0.689	0.984	NaN	NaN	NaN	NaN	NaN	NaN	NaN	NaN	NaN	NaN	NaN	NaN	NaN	NaN	NaN	NaN	NaN	NaN	NaN	NaN	NaN	NaN
1537	1.42	0.88	1.029	NaN	NaN	NaN	NaN	NaN	NaN	NaN	NaN	NaN	NaN	NaN	NaN	NaN	NaN	NaN	NaN	NaN	NaN	NaN	NaN	NaN	NaN
1538	1.238	0.734	0.988	NaN	NaN	NaN	NaN	NaN	NaN	NaN	NaN	NaN	NaN	NaN	NaN	NaN	NaN	NaN	NaN	NaN	NaN	NaN	NaN	NaN	NaN
1539	1.351	0.805	1.062	NaN	NaN	NaN	NaN	NaN	NaN	NaN	NaN	NaN	NaN	NaN	NaN	NaN	NaN	NaN	NaN	NaN	NaN	NaN	NaN	NaN	NaN
1540	1.136	0.819	1.057	NaN	NaN	NaN	NaN	NaN	NaN	NaN	NaN	NaN	NaN	NaN	NaN	NaN	NaN	NaN	NaN	NaN	NaN	NaN	NaN	NaN	NaN
1541	1.247	0.991	1.129	NaN	NaN	NaN	NaN	NaN	NaN	NaN	NaN	NaN	NaN	NaN	NaN	NaN	NaN	NaN	NaN	NaN	NaN	NaN	NaN	NaN	NaN
1542	1.268	0.998	1.021	NaN	NaN	NaN	NaN	NaN	NaN	NaN	NaN	NaN	NaN	NaN	NaN	NaN	NaN	NaN	NaN	NaN	NaN	NaN	NaN	NaN	NaN
1543	1.228	1.025	0.986	NaN	NaN	NaN	NaN	NaN	NaN	NaN	NaN	NaN	NaN	NaN	NaN	NaN	NaN	NaN	NaN	NaN	NaN	NaN	NaN	NaN	NaN
1544	1.15	1.149	0.909	NaN	NaN	NaN	NaN	NaN	NaN	NaN	NaN	NaN	NaN	NaN	NaN	NaN	NaN	NaN	NaN	NaN	NaN	NaN	NaN	NaN	NaN
1545	1.104	1.028	0.787	NaN	NaN	NaN	NaN	NaN	NaN	NaN	NaN	NaN	NaN	NaN	NaN	NaN	NaN	NaN	NaN	NaN	NaN	NaN	NaN	NaN	NaN
1546	1.263	0.86	0.91	NaN	NaN	NaN	NaN	NaN	NaN	NaN	NaN	NaN	NaN	NaN	NaN	NaN	NaN	NaN	NaN	NaN	NaN	NaN	NaN	NaN	NaN
1547	1.26	0.931	0.894	NaN	NaN	NaN	NaN	NaN	NaN	NaN	NaN	NaN	NaN	NaN	NaN	NaN	NaN	NaN	NaN	NaN	NaN	NaN	NaN	NaN	NaN
1548	1.208	0.996	0.94	NaN	NaN	NaN	NaN	NaN	NaN	NaN	NaN	NaN	NaN	NaN	NaN	NaN	NaN	NaN	NaN	NaN	NaN	NaN	NaN	NaN	NaN
1549	0.97	0.976	0.899	NaN	NaN	NaN	NaN	NaN	NaN	NaN	NaN	NaN	NaN	NaN	NaN	NaN	NaN	NaN	NaN	NaN	NaN	NaN	NaN	NaN	NaN
1550	1.056	0.967	0.895	NaN	NaN	NaN	NaN	NaN	NaN	NaN	NaN	NaN	NaN	NaN	NaN	NaN	NaN	NaN	NaN	NaN	NaN	NaN	NaN	NaN	NaN
1551	1.132	1.101	1.007	NaN	NaN	NaN	NaN	NaN	NaN	NaN	NaN	NaN	NaN	NaN	NaN	NaN	NaN	NaN	NaN	NaN	NaN	NaN	NaN	NaN	NaN
1552	1.2	1.001	1.1	NaN	NaN	NaN	NaN	NaN	NaN	NaN	NaN	NaN	NaN	NaN	NaN	NaN	NaN	NaN	NaN	NaN	NaN	NaN	NaN	NaN	NaN
1553	1.135	0.959	1.041	NaN	NaN	NaN	NaN	NaN	NaN	NaN	NaN	NaN	NaN	NaN	NaN	NaN	NaN	NaN	NaN	NaN	NaN	NaN	NaN	NaN	NaN
1554	1.002	0.701	0.931	NaN	NaN	NaN	NaN	NaN	NaN	NaN	NaN	NaN	NaN	NaN	NaN	NaN	NaN	NaN	NaN	NaN	NaN	NaN	NaN	NaN	NaN
1555	1.136	1.042	0.989	NaN	NaN	NaN	NaN	NaN	NaN	NaN	NaN	NaN	NaN	NaN	NaN	NaN	NaN	NaN	NaN	NaN	NaN	NaN	NaN	NaN	NaN
1556	1.124	0.947	1.017	NaN	NaN	NaN	NaN	NaN	NaN	NaN	NaN	NaN	NaN	NaN	NaN	NaN	NaN	NaN	NaN	NaN	NaN	NaN	NaN	NaN	NaN
1557	1.094	0.787	0.924	NaN	NaN	NaN	NaN	NaN	NaN	NaN	NaN	NaN	NaN	NaN	NaN	NaN	NaN	NaN	NaN	NaN	NaN	NaN	NaN	NaN	NaN
1558	1.211	1.02	1.006	NaN	NaN	NaN	NaN	NaN	NaN	NaN	NaN	NaN	NaN	NaN	NaN	NaN	NaN	NaN	NaN	NaN	NaN	NaN	NaN	NaN	NaN
1559	1.315	0.816	1.086	NaN	NaN	NaN	NaN	NaN	NaN	NaN	NaN	NaN	NaN	NaN	NaN	NaN	NaN	NaN	NaN	NaN	NaN	NaN	NaN	NaN	NaN
1560	1.295	0.889	1.061	NaN	NaN	NaN	NaN	NaN	NaN	NaN	NaN	NaN	NaN	NaN	NaN	NaN	NaN	NaN	NaN	NaN	NaN	NaN	NaN	NaN	NaN
1561	1.343	0.873	0.948	NaN	NaN	NaN	NaN	NaN	NaN	NaN	NaN	NaN	NaN	NaN	NaN	NaN	NaN	NaN	NaN	NaN	NaN	NaN	NaN	NaN	NaN
1562	1.15	1.079	0.942	NaN	NaN	NaN	NaN	NaN	NaN	NaN	NaN	NaN	NaN	NaN	NaN	NaN	NaN	NaN	NaN	NaN	NaN	NaN	NaN	NaN	NaN
1563	1.036	1.092	1.058	NaN	NaN	NaN	NaN	NaN	NaN	NaN	NaN	NaN	NaN	NaN	NaN	NaN	NaN	NaN	NaN	NaN	NaN	NaN	NaN	NaN	NaN
1564	1.086	0.984	1.095	NaN	NaN	NaN	NaN	NaN	NaN	NaN	NaN	NaN	NaN	NaN	NaN	NaN	NaN	NaN	NaN	NaN	NaN	NaN	NaN	NaN	NaN
1565	1.024	0.92	1.02	NaN	NaN	NaN	NaN	NaN	NaN	NaN	NaN	NaN	NaN	NaN	NaN	NaN	NaN	NaN	NaN	NaN	NaN	NaN	NaN	NaN	NaN
1566	1.16	0.951	1.004	NaN	NaN	NaN	NaN	NaN	NaN	NaN	NaN	NaN	NaN	NaN	NaN	NaN	NaN	NaN	NaN	NaN	NaN	NaN	NaN	NaN	NaN
1567	1.222	0.923	1.085	NaN	NaN	NaN	NaN	NaN	NaN	NaN	NaN	NaN	NaN	NaN	NaN	NaN	NaN	NaN	NaN	NaN	NaN	NaN	NaN	NaN	NaN
1568	1.174	0.993	0.999	NaN	NaN	NaN	NaN	NaN	NaN	NaN	NaN	NaN	NaN	NaN	NaN	NaN	NaN	NaN	NaN	NaN	NaN	NaN	NaN	NaN	NaN
1569	1.028	0.932	0.922	NaN	NaN	NaN	NaN	NaN	NaN	NaN	NaN	NaN	NaN	NaN	NaN	NaN	NaN	NaN	NaN	NaN	NaN	NaN	NaN	NaN	NaN
1570	1.193	1.006	1.02	NaN	NaN	NaN	NaN	NaN	NaN	NaN	NaN	NaN	NaN	NaN	NaN	NaN	NaN	NaN	NaN	NaN	NaN	NaN	NaN	NaN	NaN
1571	1.138	1.008	0.939	NaN	NaN	NaN	NaN	NaN	NaN	NaN	NaN	NaN	NaN	NaN	NaN	NaN	NaN	NaN	NaN	NaN	NaN	NaN	NaN	NaN	NaN
1572	1.037	0.827	0.893	NaN	NaN	NaN	NaN	NaN	NaN	NaN	NaN	NaN	NaN	NaN	NaN	NaN	NaN	NaN	NaN	NaN	NaN	NaN	NaN	NaN	NaN
1573	1.016	0.919	0.849	NaN	NaN	NaN	NaN	NaN	NaN	NaN	NaN	NaN	NaN	NaN	NaN	NaN	NaN	NaN	NaN	NaN	NaN	NaN	NaN	NaN	NaN
1574	1.065	0.988	0.848	NaN	NaN	NaN	NaN	NaN	NaN	NaN	NaN	NaN	NaN	NaN	NaN	NaN	NaN	NaN	NaN	NaN	NaN	NaN	NaN	NaN	NaN
1575	0.99	1.048	0.907	NaN	NaN	NaN	NaN	NaN	NaN	NaN	NaN	NaN	NaN	NaN	NaN	NaN	NaN	NaN	NaN	NaN	NaN	NaN	NaN	NaN	NaN
1576	1.016	1.305	0.734	NaN	NaN	NaN	NaN	NaN	NaN	NaN	NaN	NaN	NaN	NaN	NaN	NaN	NaN	NaN	NaN	NaN	NaN	NaN	NaN	NaN	NaN
1577	1.146	1.341	0.761	NaN	NaN	NaN	NaN	NaN	NaN	NaN	NaN	NaN	NaN	NaN	NaN	NaN	NaN	NaN	NaN	NaN	NaN	NaN	NaN	NaN	NaN
1578	1.189	1.173	0.867	NaN	NaN	NaN	NaN	NaN	NaN	NaN	NaN	NaN	NaN	NaN	NaN	NaN	NaN	NaN	NaN	NaN	NaN	NaN	NaN	NaN	NaN
1579	1.107	1.018	0.935	NaN	NaN	NaN	NaN	NaN	NaN	NaN	NaN	NaN	NaN	NaN	NaN	NaN	NaN	NaN	NaN	NaN	NaN	NaN	NaN	NaN	NaN
1580	1.051	1.085	0.892	NaN	NaN	NaN	NaN	NaN	NaN	NaN	NaN	NaN	NaN	NaN	NaN	NaN	NaN	NaN	NaN	NaN	NaN	NaN	NaN	NaN	NaN
1581	1.105	1.105	1.055	NaN	NaN	NaN	NaN	NaN	NaN	NaN	NaN	NaN	NaN	NaN	NaN	NaN	NaN	NaN	NaN	NaN	NaN	NaN	NaN	NaN	NaN
1582	0.983	1.073	0.951	NaN	NaN	NaN	NaN	NaN	NaN	NaN	NaN	NaN	NaN	NaN	NaN	NaN	NaN	NaN	NaN	NaN	NaN	NaN	NaN	NaN	NaN
1583	1.124	1.049	0.994	NaN	NaN	NaN	NaN	NaN	NaN	NaN	NaN	NaN	NaN	NaN	NaN	NaN	NaN	NaN	NaN	NaN	NaN	NaN	NaN	NaN	NaN
1584	1.079	0.972	1.012	NaN	NaN	NaN	NaN	NaN	NaN	NaN	NaN	NaN	NaN	NaN	NaN	NaN	NaN	NaN	NaN	NaN	NaN	NaN	NaN	NaN	NaN
1585	1.109	1.166	1.147	NaN	NaN	NaN	NaN	NaN	NaN	NaN	NaN	NaN	NaN	NaN	NaN	NaN	NaN	NaN	NaN	NaN	NaN	NaN	NaN	NaN	NaN
1586	0.964	1.036	1.036	NaN	NaN	NaN	NaN	NaN	NaN	NaN	NaN	NaN	NaN	NaN	NaN	NaN	NaN	NaN	NaN	NaN	NaN	NaN	NaN	NaN	NaN
1587	0.98	1.309	0.998	NaN	NaN	NaN	NaN	NaN	NaN	NaN	NaN	NaN	NaN	NaN	NaN	NaN	NaN	NaN	NaN	NaN	NaN	NaN	NaN	NaN	NaN
1588	1.052	1.267	0.989	NaN	NaN	NaN	NaN	NaN	NaN	NaN	NaN	NaN	NaN	NaN	NaN	NaN	NaN	NaN	NaN	NaN	NaN	NaN	NaN	NaN	NaN
1589	1.015	1.155	0.923	NaN	NaN	NaN	NaN	NaN	NaN	NaN	NaN	NaN	NaN	NaN	NaN	NaN	NaN	NaN	NaN	NaN	NaN	NaN	NaN	NaN	NaN
1590	1.006	1.083	0.941	NaN	NaN	NaN	NaN	NaN	NaN	NaN	NaN	NaN	NaN	NaN	NaN	NaN	NaN	NaN	NaN	NaN	NaN	NaN	NaN	NaN	NaN
1591	0.953	0.954	0.87	NaN	NaN	NaN	NaN	NaN	NaN	NaN	NaN	NaN	NaN	NaN	NaN	NaN	NaN	NaN	NaN	NaN	NaN	NaN	NaN	NaN	NaN
1592	1.091	0.995	0.867	NaN	NaN	NaN	NaN	NaN	NaN	NaN	NaN	NaN	NaN	NaN	NaN	NaN	NaN	NaN	NaN	NaN	NaN	NaN	NaN	NaN	NaN
1593	0.979	1.003	0.834	NaN	NaN	NaN	NaN	NaN	NaN	NaN	NaN	NaN	NaN	NaN	NaN	NaN	NaN	NaN	NaN	NaN	NaN	NaN	NaN	NaN	NaN
1594	1.073	1.096	1.009	NaN	NaN	NaN	NaN	NaN	NaN	NaN	NaN	NaN	NaN	NaN	NaN	NaN	NaN	NaN	NaN	NaN	NaN	NaN	NaN	NaN	NaN
1595	1.14	1.092	1.003	NaN	NaN	NaN	NaN	NaN	NaN	NaN	NaN	NaN	NaN	NaN	NaN	NaN	NaN	NaN	NaN	NaN	NaN	NaN	NaN	NaN	NaN
1596	1.093	1.029	1.077	NaN	NaN	NaN	NaN	NaN	NaN	NaN	NaN	NaN	NaN	NaN	NaN	NaN	NaN	NaN	NaN	NaN	NaN	NaN	NaN	NaN	NaN
1597	1.009	0.842	1.036	NaN	NaN	NaN	NaN	NaN	NaN	NaN	NaN	NaN	NaN	NaN	NaN	NaN	NaN	NaN	NaN	NaN	NaN	NaN	NaN	NaN	NaN
1598	1.071	1.194	1.07	NaN	NaN	NaN	NaN	NaN	NaN	NaN	NaN	NaN	NaN	NaN	NaN	NaN	NaN	NaN	NaN	NaN	NaN	NaN	NaN	NaN	NaN
1599	1.103	0.951	0.948	NaN	NaN	NaN	NaN	NaN	NaN	NaN	NaN	NaN	NaN	NaN	NaN	NaN	NaN	NaN	NaN	NaN	NaN	NaN	NaN	NaN	NaN
1600	1.122	0.886	1.028	NaN	NaN	NaN	NaN	NaN	NaN	NaN	NaN	NaN	NaN	NaN	NaN	NaN	NaN	NaN	NaN	NaN	NaN	NaN	NaN	NaN	NaN
1601	0.967	0.769	0.893	NaN	NaN	NaN	NaN	NaN	NaN	NaN	NaN	NaN	NaN	NaN	NaN	NaN	NaN	NaN	NaN	NaN	NaN	NaN	NaN	NaN	NaN
1602	1.059	1.132	1.082	NaN	NaN	NaN	NaN	NaN	NaN	NaN	NaN	NaN	NaN	NaN	NaN	NaN	NaN	NaN	NaN	NaN	NaN	NaN	NaN	NaN	NaN
1603	0.872	0.928	1.123	NaN	NaN	NaN	NaN	NaN	NaN	NaN	NaN	NaN	NaN	NaN	NaN	NaN	NaN	NaN	NaN	NaN	NaN	NaN	NaN	NaN	NaN
1604	0.972	1.088	1.163	NaN	NaN	NaN	NaN	NaN	NaN	NaN	NaN	NaN	NaN	NaN	NaN	NaN	NaN	NaN	NaN	NaN	NaN	NaN	NaN	NaN	NaN
1605	0.784	1.02	1.105	NaN	NaN	NaN	NaN	NaN	NaN	NaN	NaN	NaN	NaN	NaN	NaN	NaN	NaN	NaN	NaN	NaN	NaN	NaN	NaN	NaN	NaN
1606	0.881	0.897	0.948	NaN	NaN	NaN	NaN	NaN	NaN	NaN	NaN	NaN	NaN	NaN	NaN	NaN	NaN	NaN	NaN	NaN	NaN	NaN	NaN	NaN	NaN
1607	0.911	1.128	0.912	NaN	NaN	NaN	NaN	NaN	NaN	NaN	NaN	NaN	NaN	NaN	NaN	NaN	NaN	NaN	NaN	NaN	NaN	NaN	NaN	NaN	NaN
1608	0.839	0.943	0.977	NaN	NaN	NaN	NaN	NaN	NaN	NaN	NaN	NaN	NaN	NaN	NaN	NaN	NaN	NaN	NaN	NaN	NaN	NaN	NaN	NaN	NaN
1609	0.907	1.065	1.017	NaN	NaN	NaN	NaN	NaN	NaN	NaN	NaN	NaN	NaN	NaN	NaN	NaN	NaN	NaN	NaN	NaN	NaN	NaN	NaN	NaN	NaN
1610	0.935	0.777	1.082	NaN	NaN	NaN	NaN	NaN	NaN	NaN	NaN	NaN	NaN	NaN	NaN	NaN	NaN	NaN	NaN	NaN	NaN	NaN	NaN	NaN	NaN
1611	1.033	1.154	1.229	NaN	NaN	NaN	NaN	NaN	NaN	NaN	NaN	NaN	NaN	NaN	NaN	NaN	NaN	NaN	NaN	NaN	NaN	NaN	NaN	NaN	NaN
1612	1.026	0.966	1.127	NaN	NaN	NaN	NaN	NaN	NaN	NaN	NaN	NaN	NaN	NaN	NaN	NaN	NaN	NaN	NaN	NaN	NaN	NaN	NaN	NaN	NaN
1613	0.933	1.07	0.947	NaN	NaN	NaN	NaN	NaN	NaN	NaN	NaN	NaN	NaN	NaN	NaN	NaN	NaN	NaN	NaN	NaN	NaN	NaN	NaN	NaN	NaN
1614	0.98	1.088	0.947	NaN	NaN	NaN	NaN	NaN	NaN	NaN	NaN	NaN	NaN	NaN	NaN	NaN	NaN	NaN	NaN	NaN	NaN	NaN	NaN	NaN	NaN
1615	1.014	1.064	0.921	NaN	NaN	NaN	NaN	NaN	NaN	NaN	NaN	NaN	NaN	NaN	NaN	NaN	NaN	NaN	NaN	NaN	NaN	NaN	NaN	NaN	NaN
1616	1.094	0.961	1.087	NaN	NaN	NaN	NaN	NaN	NaN	NaN	NaN	NaN	NaN	NaN	NaN	NaN	NaN	NaN	NaN	NaN	NaN	NaN	NaN	NaN	NaN
1617	1.163	1.364	1.21	NaN	NaN	NaN	NaN	NaN	NaN	NaN	NaN	NaN	NaN	NaN	NaN	NaN	NaN	NaN	NaN	NaN	NaN	NaN	NaN	NaN	NaN
1618	1.069	1.031	1.055	NaN	NaN	NaN	NaN	NaN	NaN	NaN	NaN	NaN	NaN	NaN	NaN	NaN	NaN	NaN	NaN	NaN	NaN	NaN	NaN	NaN	NaN
1619	0.896	0.82	1.104	NaN	NaN	NaN	NaN	NaN	NaN	NaN	NaN	NaN	NaN	NaN	NaN	NaN	NaN	NaN	NaN	NaN	NaN	NaN	NaN	NaN	NaN
1620	1.023	1.041	1.166	NaN	NaN	NaN	NaN	NaN	NaN	NaN	NaN	NaN	NaN	NaN	NaN	NaN	NaN	NaN	NaN	NaN	NaN	NaN	NaN	NaN	NaN
1621	1.035	0.984	1.21	NaN	NaN	NaN	NaN	NaN	NaN	NaN	NaN	NaN	NaN	NaN	NaN	NaN	NaN	NaN	NaN	NaN	NaN	NaN	NaN	NaN	NaN
1622	0.884	1.051	1.11	NaN	NaN	NaN	NaN	NaN	NaN	NaN	NaN	NaN	NaN	NaN	NaN	NaN	NaN	NaN	NaN	NaN	NaN	NaN	NaN	NaN	NaN
1623	0.982	1.174	1.288	NaN	NaN	NaN	NaN	NaN	NaN	NaN	NaN	NaN	NaN	NaN	NaN	NaN	NaN	NaN	NaN	NaN	NaN	NaN	NaN	NaN	NaN
1624	0.926	0.932	1.183	NaN	NaN	NaN	NaN	NaN	NaN	NaN	NaN	NaN	NaN	NaN	NaN	NaN	NaN	NaN	NaN	NaN	NaN	NaN	NaN	NaN	NaN
1625	0.971	0.993	1.155	NaN	NaN	NaN	NaN	NaN	NaN	NaN	NaN	NaN	NaN	NaN	NaN	NaN	NaN	NaN	NaN	NaN	NaN	NaN	NaN	NaN	NaN
1626	1.074	0.688	0.986	NaN	NaN	NaN	NaN	NaN	NaN	NaN	NaN	NaN	NaN	NaN	NaN	NaN	NaN	NaN	NaN	NaN	NaN	NaN	NaN	NaN	NaN
1627	1.063	0.924	0.938	NaN	NaN	NaN	NaN	NaN	NaN	NaN	NaN	NaN	NaN	NaN	NaN	NaN	NaN	NaN	NaN	NaN	NaN	NaN	NaN	NaN	NaN
1628	1.015	0.939	1.042	NaN	NaN	NaN	NaN	NaN	NaN	NaN	NaN	NaN	NaN	NaN	NaN	NaN	NaN	NaN	NaN	NaN	NaN	NaN	NaN	NaN	NaN
1629	0.975	1.019	1.014	NaN	NaN	NaN	NaN	NaN	NaN	NaN	NaN	NaN	NaN	NaN	NaN	NaN	NaN	NaN	NaN	NaN	NaN	NaN	NaN	NaN	NaN
1630	1.076	1.284	0.986	NaN	NaN	NaN	NaN	NaN	NaN	NaN	NaN	NaN	NaN	NaN	NaN	NaN	NaN	NaN	NaN	NaN	NaN	NaN	NaN	NaN	NaN
1631	0.972	1.118	0.997	NaN	NaN	NaN	NaN	NaN	NaN	NaN	NaN	NaN	NaN	NaN	NaN	NaN	NaN	NaN	NaN	NaN	NaN	NaN	NaN	NaN	NaN
1632	0.92	1.292	0.999	NaN	NaN	NaN	NaN	NaN	NaN	NaN	NaN	NaN	NaN	NaN	NaN	NaN	NaN	NaN	NaN	NaN	NaN	NaN	NaN	NaN	NaN
1633	0.936	1.304	0.829	NaN	NaN	NaN	NaN	NaN	NaN	NaN	NaN	NaN	NaN	NaN	NaN	NaN	NaN	NaN	NaN	NaN	NaN	NaN	NaN	NaN	NaN
1634	1.054	1.23	0.797	NaN	NaN	NaN	NaN	NaN	NaN	NaN	NaN	NaN	NaN	NaN	NaN	NaN	NaN	NaN	NaN	NaN	NaN	NaN	NaN	NaN	NaN
1635	0.996	1.276	0.901	NaN	NaN	NaN	NaN	NaN	NaN	NaN	NaN	NaN	NaN	NaN	NaN	0.86	NaN	NaN	NaN	NaN	NaN	NaN	NaN	NaN	NaN
1636	0.998	1.168	0.883	NaN	NaN	NaN	NaN	NaN	NaN	NaN	NaN	NaN	NaN	NaN	NaN	0.894	NaN	NaN	NaN	NaN	NaN	NaN	NaN	NaN	NaN
1637	1.148	0.966	0.981	NaN	NaN	NaN	NaN	NaN	NaN	NaN	NaN	NaN	NaN	NaN	NaN	0.897	NaN	NaN	NaN	NaN	NaN	NaN	NaN	NaN	NaN
1638	1.109	0.994	1.116	NaN	NaN	NaN	NaN	NaN	NaN	NaN	NaN	NaN	NaN	NaN	NaN	0.867	NaN	NaN	NaN	NaN	NaN	NaN	NaN	NaN	NaN
1639	0.984	1.189	1.105	NaN	NaN	NaN	NaN	NaN	NaN	1.006	NaN	NaN	NaN	NaN	NaN	0.867	NaN	NaN	NaN	NaN	NaN	NaN	NaN	NaN	NaN
1640	1.084	1.299	1.165	NaN	NaN	NaN	NaN	NaN	NaN	0.822	NaN	NaN	NaN	NaN	NaN	0.938	NaN	NaN	NaN	NaN	NaN	NaN	NaN	NaN	NaN
1641	1.096	1.381	1.146	NaN	NaN	NaN	NaN	NaN	NaN	1.094	NaN	NaN	NaN	NaN	NaN	0.849	NaN	NaN	NaN	NaN	NaN	NaN	NaN	NaN	NaN
1642	0.994	1.24	1.103	NaN	NaN	NaN	NaN	NaN	NaN	0.974	NaN	NaN	NaN	NaN	NaN	0.917	NaN	NaN	NaN	NaN	NaN	NaN	NaN	NaN	NaN
1643	0.875	0.79	1.147	NaN	NaN	NaN	NaN	NaN	NaN	0.854	NaN	NaN	NaN	NaN	NaN	0.746	NaN	NaN	NaN	NaN	NaN	NaN	NaN	NaN	NaN
1644	0.812	1.059	0.976	NaN	NaN	NaN	NaN	NaN	NaN	0.993	NaN	NaN	NaN	NaN	NaN	0.919	NaN	NaN	NaN	NaN	NaN	NaN	NaN	NaN	NaN
1645	0.909	1.261	0.997	NaN	NaN	NaN	NaN	NaN	NaN	1.247	NaN	NaN	1.289	NaN	NaN	1.071	NaN	NaN	NaN	NaN	NaN	NaN	NaN	NaN	NaN
1646	0.921	1.124	1.089	NaN	NaN	NaN	NaN	NaN	NaN	1.189	NaN	NaN	1.237	NaN	NaN	0.975	NaN	NaN	NaN	NaN	NaN	NaN	NaN	NaN	NaN
1647	0.944	1.018	1.099	NaN	NaN	NaN	NaN	NaN	NaN	1.357	NaN	NaN	1.298	NaN	NaN	1.094	NaN	NaN	NaN	NaN	NaN	NaN	NaN	NaN	NaN
1648	1.102	1.049	1.085	NaN	NaN	NaN	NaN	NaN	NaN	1.342	NaN	NaN	1.449	NaN	NaN	1.046	NaN	NaN	NaN	NaN	NaN	NaN	NaN	NaN	NaN
1649	1.035	1.188	1.127	NaN	NaN	NaN	NaN	NaN	NaN	1.109	NaN	NaN	1.414	NaN	NaN	1.215	NaN	NaN	NaN	NaN	NaN	NaN	NaN	NaN	NaN
1650	0.892	1.289	1.173	NaN	NaN	NaN	NaN	NaN	NaN	1.151	NaN	NaN	1.461	NaN	NaN	1.165	NaN	NaN	NaN	NaN	NaN	NaN	NaN	NaN	NaN
1651	1.076	1.213	1.012	NaN	NaN	NaN	NaN	NaN	NaN	1.108	NaN	NaN	1.298	NaN	NaN	1.136	NaN	NaN	NaN	NaN	NaN	NaN	NaN	NaN	NaN
1652	0.846	0.871	0.834	NaN	NaN	NaN	NaN	NaN	NaN	1	NaN	NaN	0.86	NaN	NaN	0.987	NaN	NaN	NaN	NaN	NaN	NaN	NaN	NaN	NaN
1653	1.023	1.05	0.946	NaN	NaN	NaN	NaN	NaN	NaN	1.271	NaN	NaN	1.056	NaN	NaN	1.149	NaN	NaN	NaN	NaN	NaN	NaN	NaN	NaN	NaN
1654	0.925	0.926	1.075	NaN	NaN	NaN	NaN	NaN	NaN	0.963	NaN	NaN	0.707	NaN	NaN	1.046	NaN	NaN	NaN	NaN	NaN	NaN	NaN	NaN	NaN
1655	1.05	1.027	1.1	NaN	NaN	NaN	NaN	NaN	NaN	1.017	NaN	NaN	0.975	NaN	NaN	1.241	NaN	NaN	NaN	NaN	NaN	NaN	NaN	NaN	NaN
1656	1.089	1.139	1.061	NaN	NaN	NaN	NaN	NaN	NaN	0.807	NaN	NaN	1.281	NaN	NaN	1.332	NaN	NaN	NaN	NaN	NaN	NaN	NaN	NaN	NaN
1657	1.061	0.757	0.962	NaN	NaN	NaN	NaN	NaN	NaN	0.656	NaN	NaN	0.679	NaN	NaN	1.214	NaN	NaN	NaN	NaN	NaN	NaN	NaN	NaN	NaN
1658	1.081	1.056	0.928	NaN	NaN	NaN	NaN	NaN	NaN	0.608	NaN	NaN	0.983	NaN	NaN	1.08	NaN	NaN	NaN	NaN	NaN	NaN	NaN	NaN	NaN
1659	0.91	0.819	0.734	NaN	NaN	NaN	NaN	NaN	NaN	0.356	NaN	NaN	0.679	NaN	NaN	0.716	NaN	NaN	NaN	NaN	NaN	NaN	NaN	NaN	NaN
1660	0.897	1.066	0.933	NaN	NaN	NaN	NaN	NaN	NaN	0.64	NaN	NaN	0.99	NaN	NaN	1.102	NaN	NaN	NaN	NaN	NaN	NaN	NaN	NaN	NaN
1661	0.925	1.095	0.911	NaN	NaN	NaN	NaN	NaN	NaN	0.614	NaN	NaN	0.74	NaN	NaN	0.958	NaN	NaN	NaN	NaN	NaN	NaN	NaN	NaN	NaN
1662	0.964	1.182	1.032	NaN	NaN	NaN	NaN	NaN	NaN	0.717	NaN	NaN	1.041	NaN	NaN	1.087	NaN	NaN	NaN	NaN	NaN	NaN	NaN	NaN	NaN
1663	0.954	1.137	1.104	NaN	NaN	NaN	NaN	NaN	NaN	0.633	NaN	NaN	1.251	NaN	NaN	1.111	NaN	NaN	NaN	NaN	NaN	NaN	NaN	NaN	NaN
1664	0.892	1.156	1.132	NaN	NaN	NaN	NaN	NaN	NaN	0.706	NaN	NaN	1.201	NaN	NaN	1.074	NaN	NaN	NaN	NaN	NaN	NaN	NaN	NaN	NaN
1665	0.818	1.048	1.092	NaN	NaN	NaN	NaN	NaN	NaN	0.706	NaN	NaN	1.059	NaN	NaN	1.135	NaN	NaN	NaN	NaN	NaN	NaN	NaN	NaN	NaN
1666	0.787	1.205	0.993	NaN	NaN	NaN	NaN	NaN	NaN	0.524	NaN	NaN	1.097	NaN	NaN	0.983	NaN	NaN	NaN	NaN	NaN	NaN	NaN	NaN	NaN
1667	0.805	0.815	0.893	NaN	NaN	NaN	NaN	NaN	NaN	0.606	NaN	NaN	0.603	NaN	NaN	0.921	NaN	NaN	NaN	NaN	NaN	NaN	NaN	NaN	NaN
1668	0.875	0.926	0.916	NaN	NaN	NaN	NaN	NaN	NaN	0.725	NaN	NaN	0.775	NaN	NaN	1.061	NaN	NaN	NaN	NaN	NaN	NaN	NaN	NaN	NaN
1669	0.8	0.925	0.959	NaN	NaN	NaN	0.893	NaN	NaN	0.691	NaN	NaN	0.681	NaN	NaN	0.959	NaN	NaN	NaN	NaN	NaN	NaN	NaN	NaN	NaN
1670	0.643	0.756	0.969	NaN	NaN	NaN	0.946	NaN	NaN	0.784	NaN	NaN	0.601	NaN	NaN	1.006	NaN	NaN	NaN	NaN	NaN	NaN	NaN	NaN	NaN
1671	0.762	0.898	0.926	NaN	NaN	NaN	1.145	NaN	NaN	0.747	NaN	NaN	1.006	NaN	NaN	0.901	NaN	NaN	NaN	NaN	NaN	NaN	NaN	NaN	NaN
1672	0.771	0.918	0.949	NaN	NaN	NaN	1.109	NaN	NaN	0.705	NaN	NaN	1.112	NaN	NaN	1.022	NaN	NaN	NaN	NaN	NaN	NaN	NaN	NaN	NaN
1673	0.893	1.056	0.9	NaN	NaN	NaN	1.268	NaN	NaN	0.976	NaN	NaN	1.099	NaN	NaN	1.239	NaN	NaN	NaN	NaN	NaN	NaN	NaN	NaN	NaN
1674	0.851	0.946	0.581	NaN	NaN	NaN	1.084	NaN	NaN	0.818	NaN	NaN	0.917	NaN	NaN	0.803	NaN	NaN	NaN	NaN	NaN	NaN	NaN	NaN	NaN
1675	0.723	0.973	0.601	NaN	NaN	NaN	0.996	NaN	NaN	1.006	NaN	NaN	0.891	NaN	NaN	0.856	NaN	NaN	NaN	NaN	NaN	NaN	NaN	NaN	NaN
1676	0.722	0.905	0.824	NaN	NaN	NaN	0.948	NaN	NaN	1.137	NaN	NaN	0.737	NaN	NaN	1.009	NaN	NaN	NaN	NaN	NaN	NaN	NaN	NaN	NaN
1677	0.759	0.945	0.85	NaN	NaN	NaN	0.798	NaN	NaN	0.749	NaN	NaN	0.561	NaN	NaN	0.796	NaN	NaN	NaN	NaN	NaN	NaN	NaN	NaN	NaN
1678	0.825	0.925	0.958	NaN	NaN	NaN	0.71	NaN	NaN	1.107	NaN	NaN	0.861	NaN	NaN	1.027	NaN	NaN	NaN	NaN	NaN	NaN	NaN	NaN	NaN
1679	0.754	0.709	1.114	NaN	NaN	NaN	0.502	NaN	NaN	0.721	NaN	NaN	0.562	NaN	NaN	0.922	NaN	NaN	NaN	NaN	NaN	NaN	NaN	NaN	NaN
1680	0.828	0.858	0.974	NaN	NaN	NaN	0.887	NaN	NaN	1.122	NaN	NaN	0.916	NaN	NaN	1.089	NaN	NaN	NaN	NaN	NaN	NaN	NaN	NaN	NaN
1681	0.951	0.828	1.171	NaN	NaN	NaN	0.542	NaN	NaN	1.138	NaN	NaN	0.82	NaN	NaN	1.106	NaN	NaN	NaN	NaN	NaN	NaN	NaN	NaN	NaN
1682	0.918	0.836	0.997	NaN	NaN	NaN	0.76	NaN	NaN	0.914	NaN	NaN	0.941	NaN	NaN	1.258	NaN	NaN	NaN	NaN	NaN	NaN	NaN	NaN	NaN
1683	1.025	0.998	1.116	NaN	NaN	NaN	1.21	NaN	NaN	1.123	NaN	NaN	1.269	NaN	NaN	1.467	NaN	NaN	NaN	NaN	NaN	NaN	NaN	NaN	NaN
1684	1.075	0.963	1.152	NaN	NaN	NaN	0.933	NaN	NaN	1.077	NaN	NaN	1.191	NaN	NaN	1.313	NaN	NaN	NaN	NaN	NaN	NaN	NaN	NaN	NaN
1685	0.885	1.121	1.199	NaN	NaN	NaN	1.335	NaN	NaN	1.195	NaN	NaN	1.302	NaN	NaN	1.234	NaN	NaN	NaN	NaN	NaN	NaN	NaN	NaN	NaN
1686	1.05	1.388	1.4	NaN	NaN	NaN	1.472	NaN	NaN	1.506	NaN	NaN	1.283	NaN	NaN	1.481	NaN	1.083	NaN	NaN	NaN	NaN	NaN	NaN	NaN
1687	0.948	1.241	1.335	NaN	NaN	NaN	1.154	NaN	NaN	1.409	NaN	NaN	1.11	NaN	NaN	1.262	NaN	1.024	NaN	NaN	NaN	NaN	NaN	NaN	NaN
1688	0.874	1.063	1.086	NaN	NaN	NaN	0.936	NaN	NaN	1.276	NaN	NaN	0.914	NaN	NaN	1.115	NaN	0.803	NaN	NaN	NaN	NaN	NaN	NaN	NaN
1689	0.853	0.989	1.017	NaN	NaN	NaN	0.902	NaN	NaN	1.264	NaN	NaN	1.052	NaN	NaN	1.014	NaN	0.832	NaN	NaN	NaN	NaN	NaN	NaN	NaN
1690	0.82	0.746	0.866	NaN	NaN	NaN	0.777	NaN	NaN	1.027	NaN	NaN	0.84	NaN	NaN	0.822	NaN	0.589	NaN	NaN	NaN	NaN	NaN	NaN	NaN
1691	1.03	1.052	0.972	NaN	NaN	NaN	1.031	NaN	NaN	0.986	NaN	0.912	0.845	NaN	NaN	0.97	NaN	0.695	NaN	NaN	NaN	NaN	NaN	NaN	NaN
1692	0.977	0.999	0.947	NaN	NaN	NaN	1.057	NaN	NaN	1.17	NaN	0.925	0.909	NaN	NaN	0.842	NaN	0.847	NaN	NaN	NaN	NaN	NaN	NaN	NaN
1693	1.016	0.84	0.903	NaN	NaN	NaN	0.689	NaN	NaN	0.712	NaN	0.678	0.779	NaN	NaN	0.852	NaN	0.631	NaN	NaN	NaN	NaN	NaN	NaN	NaN
1694	1.166	1.167	1.053	NaN	1.204	NaN	1.017	NaN	NaN	1.125	NaN	0.991	1.08	NaN	NaN	1.081	NaN	0.995	NaN	NaN	NaN	NaN	NaN	NaN	NaN
1695	1.06	1.031	0.991	NaN	1.059	NaN	0.948	NaN	NaN	0.915	NaN	0.851	0.914	NaN	NaN	0.98	NaN	0.859	NaN	NaN	NaN	NaN	NaN	NaN	NaN
1696	0.909	1.199	1.041	NaN	1.044	NaN	1.19	NaN	NaN	0.818	NaN	0.951	0.915	NaN	NaN	0.921	NaN	1.09	NaN	NaN	NaN	NaN	NaN	NaN	NaN
1697	0.879	1.187	1.02	NaN	1.008	NaN	0.988	NaN	NaN	0.98	NaN	0.84	0.621	NaN	NaN	0.935	NaN	0.809	NaN	NaN	NaN	NaN	NaN	NaN	NaN
1698	0.807	1.177	0.908	NaN	0.979	NaN	1.042	NaN	NaN	1.008	NaN	1.011	0.833	NaN	NaN	0.902	NaN	0.971	NaN	NaN	NaN	NaN	NaN	NaN	NaN
1699	0.797	1.144	0.654	NaN	0.933	NaN	0.887	NaN	NaN	1.122	NaN	1.24	0.877	NaN	NaN	0.798	NaN	0.974	NaN	NaN	NaN	NaN	NaN	NaN	NaN
1700	0.916	0.984	0.77	NaN	1.115	NaN	0.686	NaN	NaN	1.183	NaN	1.116	0.969	NaN	NaN	0.987	NaN	1.085	NaN	NaN	NaN	NaN	NaN	NaN	NaN
1701	0.917	0.862	0.762	NaN	1.046	NaN	0.835	NaN	NaN	0.918	NaN	1.246	1.028	NaN	NaN	0.886	NaN	0.908	NaN	NaN	NaN	NaN	NaN	NaN	NaN
1702	0.996	1.141	0.872	NaN	1.178	NaN	0.809	NaN	NaN	0.842	NaN	1.046	1.208	NaN	NaN	1.032	NaN	0.884	NaN	NaN	NaN	NaN	NaN	NaN	NaN
1703	1.004	0.923	1.005	NaN	1.136	NaN	0.939	NaN	NaN	0.801	NaN	0.853	1.086	NaN	NaN	0.995	NaN	0.821	NaN	NaN	NaN	NaN	NaN	NaN	NaN
1704	1.05	0.908	0.851	NaN	1.066	NaN	0.548	NaN	NaN	0.643	NaN	1.119	1.181	NaN	NaN	0.913	NaN	0.972	NaN	NaN	0.654	NaN	NaN	NaN	NaN
1705	1.076	1.104	0.945	NaN	1.008	NaN	0.88	NaN	NaN	0.754	NaN	0.934	1.152	NaN	NaN	0.95	NaN	0.919	NaN	NaN	0.7	NaN	NaN	NaN	NaN
1706	1.05	1.067	0.86	NaN	1.035	NaN	1.024	NaN	NaN	0.962	NaN	1.192	1.139	NaN	NaN	1.12	NaN	0.97	NaN	NaN	0.811	NaN	NaN	0.958	NaN
1707	1.059	1.199	0.932	NaN	1.025	NaN	1.053	NaN	NaN	0.909	NaN	0.977	0.982	NaN	NaN	1.143	NaN	0.954	NaN	1.034	0.823	NaN	NaN	1.068	NaN
1708	0.945	1.276	0.894	NaN	0.815	NaN	1.223	NaN	NaN	0.955	NaN	1.062	1.027	NaN	NaN	0.99	NaN	1.093	NaN	0.977	0.937	NaN	NaN	1.139	NaN
1709	0.816	1.049	0.865	NaN	0.68	NaN	1.153	NaN	NaN	0.868	NaN	0.978	0.591	NaN	NaN	0.682	NaN	0.91	NaN	0.866	0.98	NaN	NaN	0.914	NaN
1710	0.846	1.065	1.025	NaN	0.853	NaN	0.931	NaN	NaN	0.949	NaN	1.056	0.563	NaN	NaN	0.819	NaN	0.908	NaN	0.941	1.104	NaN	NaN	0.907	NaN
1711	0.864	1.086	0.982	NaN	0.814	NaN	1.072	NaN	NaN	0.943	NaN	1.028	0.67	1.043	NaN	0.815	NaN	0.938	NaN	0.91	0.9	NaN	NaN	0.819	NaN
1712	0.823	0.909	1.021	NaN	0.929	NaN	0.558	NaN	NaN	0.832	NaN	0.803	0.98	1.01	NaN	0.757	NaN	0.837	NaN	0.774	1.115	NaN	NaN	0.88	1.012
1713	0.79	1.082	1.08	NaN	0.967	NaN	0.867	NaN	NaN	0.856	NaN	1.163	1.233	1.227	NaN	0.81	NaN	1.006	NaN	1.236	0.96	NaN	NaN	1.067	1.148
1714	0.843	1.01	1.104	NaN	0.957	NaN	0.904	NaN	NaN	0.927	NaN	1.032	1.137	1.096	NaN	0.811	NaN	0.832	NaN	1.027	1.14	NaN	NaN	1.087	0.98
1715	0.977	1.105	1.243	NaN	1.126	NaN	1.04	NaN	NaN	1.109	NaN	1.283	1.169	1.248	NaN	1.077	NaN	1.046	NaN	1.25	1.329	NaN	NaN	1.367	1.15
1716	0.958	0.962	1.207	NaN	1.048	NaN	0.801	NaN	NaN	0.886	NaN	1.251	0.957	0.968	NaN	0.992	NaN	0.887	NaN	0.974	1.1	NaN	NaN	1.063	0.923
1717	0.922	1.03	1.165	NaN	0.947	NaN	1.042	NaN	NaN	1.049	NaN	0.901	0.892	1.128	NaN	0.887	NaN	1.028	NaN	0.926	1.137	NaN	NaN	1.012	1.097
1718	0.912	0.993	1.011	NaN	0.937	NaN	1.093	NaN	NaN	1.209	NaN	1.314	0.945	1.196	NaN	0.924	NaN	1.065	NaN	1.26	1.097	NaN	NaN	1.062	1.26
1719	0.805	0.818	0.8	NaN	0.885	NaN	0.73	NaN	NaN	0.965	NaN	0.956	0.979	0.668	NaN	0.842	NaN	0.785	NaN	0.889	0.97	NaN	NaN	1.179	0.971
1720	0.888	0.87	1.063	NaN	1.074	NaN	0.892	NaN	NaN	1.12	NaN	1.025	1.031	0.925	NaN	1.131	NaN	0.823	NaN	0.886	1.114	NaN	NaN	1.472	1.091
1721	0.863	0.92	1.058	NaN	1.028	NaN	0.77	NaN	NaN	1.012	NaN	0.98	1.169	0.832	NaN	1.004	NaN	0.832	NaN	0.77	1.037	NaN	NaN	1.146	1.14
1722	0.957	1.098	1.058	1.238	1.076	NaN	1.088	1.05	NaN	1.275	NaN	1.182	1.165	0.919	NaN	1.141	NaN	0.999	NaN	1.009	1.073	NaN	NaN	1.01	0.994
1723	0.987	1.016	0.972	1.058	1.14	NaN	0.881	0.702	NaN	1.101	NaN	1.005	1.067	0.922	NaN	0.905	NaN	1.037	NaN	0.907	1.114	NaN	NaN	0.886	1.026
1724	0.96	1.017	1.035	1.031	1.138	NaN	1.096	0.927	NaN	1.133	NaN	0.769	0.917	0.917	NaN	0.942	NaN	0.917	NaN	0.845	1.155	NaN	NaN	0.885	0.866
1725	0.986	1.295	1.069	1.404	1.182	NaN	1.149	1.157	NaN	1.306	NaN	0.97	1.243	0.949	NaN	1.147	NaN	1.199	NaN	1.096	1.13	NaN	NaN	0.996	1.154
1726	0.94	0.818	1.105	0.748	1.004	NaN	0.594	0.53	NaN	0.867	NaN	0.435	0.899	0.734	NaN	1.035	NaN	0.821	NaN	0.883	0.764	NaN	NaN	0.562	0.483
1727	1.015	1.113	1.209	0.782	1.11	NaN	0.864	0.601	NaN	1.046	NaN	0.53	0.795	0.952	NaN	1.221	NaN	0.98	NaN	0.849	0.852	NaN	NaN	0.591	0.653
1728	1.053	1.056	1.085	0.996	1.122	NaN	0.979	0.768	NaN	1.07	NaN	0.76	0.909	0.863	NaN	1.149	NaN	0.983	NaN	0.775	0.868	NaN	NaN	0.765	0.596
1729	1.08	1.161	1.081	0.891	1.159	NaN	1.068	1.047	NaN	1.074	NaN	0.868	0.888	0.777	NaN	1.195	NaN	0.948	NaN	0.818	0.93	NaN	NaN	1.034	0.716
1730	1.102	1.024	1.257	1.159	1.124	NaN	0.979	1.047	NaN	1.134	NaN	0.766	0.893	0.965	NaN	1.251	NaN	0.888	NaN	0.936	1.03	NaN	NaN	0.982	0.841
1731	1.069	1.114	1.249	1.273	1.165	NaN	0.964	1.016	NaN	1.076	NaN	0.89	0.911	1.113	NaN	1.089	NaN	1.017	NaN	0.89	1.317	NaN	NaN	1.165	1.032
1732	1.114	1.247	1.243	1.379	1.182	NaN	1.347	1.198	NaN	1.095	NaN	0.996	1.078	1.089	NaN	1.194	NaN	1.134	NaN	0.806	1.136	NaN	NaN	1.35	1.254
1733	1.118	0.975	1.215	1.163	1.095	NaN	1.218	0.876	NaN	0.985	NaN	1.083	1.02	0.875	NaN	1.106	NaN	1.212	NaN	0.78	1.151	NaN	NaN	0.934	1.309
1734	1.096	1.107	1.305	1.358	1.115	NaN	1.167	1.047	NaN	1.149	NaN	1.074	1.01	1.24	NaN	1.214	NaN	1.214	NaN	1.038	1.174	NaN	NaN	1.089	1.283
1735	0.965	1.175	1.111	1.129	0.929	NaN	1.355	1.243	NaN	1.211	NaN	1.004	1.03	1.2	NaN	1.202	NaN	1.222	NaN	1.28	1.048	NaN	NaN	1.292	1.079
1736	0.992	1.176	1.083	1.217	0.884	NaN	1.09	1.022	NaN	1.109	NaN	0.867	1.024	1.034	NaN	1.017	NaN	0.971	NaN	1	0.906	NaN	NaN	1.033	0.874
1737	1.029	0.957	1.071	1.174	0.831	NaN	0.892	1.041	NaN	1.037	NaN	1.048	1.006	1.169	NaN	1.133	NaN	1.045	NaN	1.27	0.901	NaN	NaN	0.832	1.094
1738	1.169	1.01	1.153	1.085	0.992	NaN	1.134	1.053	NaN	1.241	NaN	0.94	1.025	1.131	NaN	1.327	NaN	1.234	NaN	1.353	1.027	NaN	NaN	0.973	1.212
1739	1.102	0.918	1.156	0.473	0.921	NaN	0.97	0.765	0.728	1.25	NaN	0.935	0.871	0.844	NaN	1.223	NaN	0.846	NaN	1.171	0.901	NaN	NaN	0.877	0.993
1740	0.916	0.798	0.991	0.607	0.763	NaN	1.025	0.702	0.543	0.892	NaN	0.617	0.844	0.815	NaN	0.889	NaN	0.899	NaN	1.17	0.692	NaN	NaN	0.811	1.037
1741	0.899	0.835	0.783	0.655	0.652	NaN	1.121	0.917	0.608	0.972	NaN	0.73	0.949	0.851	NaN	0.834	NaN	0.888	NaN	1.262	0.558	NaN	NaN	1.055	1.082
1742	1.008	1.107	0.871	0.712	0.867	NaN	1.266	1.143	0.844	1.137	NaN	0.975	1.176	0.919	NaN	0.934	NaN	1.112	NaN	1.297	0.688	NaN	NaN	1.173	1.459
1743	1.013	0.935	1.056	0.697	0.863	NaN	1.132	0.886	0.997	1.253	NaN	0.888	0.898	0.824	NaN	0.877	NaN	1.085	NaN	1.135	0.909	NaN	NaN	0.972	1.174
1744	1.032	1.049	1.042	0.969	0.852	NaN	1.056	1.163	1.183	1.104	NaN	0.936	0.895	1.014	NaN	0.831	NaN	1.118	NaN	1.22	1.044	NaN	NaN	1.101	1.264
1745	0.91	1.112	1.12	1.247	0.864	NaN	1.411	1.16	1.042	1.116	NaN	1.033	0.98	1.194	NaN	0.884	NaN	1.159	NaN	1.319	0.908	NaN	NaN	1.165	1.372
1746	0.861	1.026	0.828	0.89	0.853	NaN	1.045	1.148	0.793	1.028	NaN	0.903	0.939	0.904	NaN	0.809	NaN	1.163	NaN	1.154	0.954	NaN	NaN	0.948	1.155
1747	0.921	0.957	0.953	0.881	1.024	NaN	1.017	0.783	0.879	0.844	NaN	0.834	0.83	0.905	NaN	0.852	NaN	1.049	NaN	0.928	0.884	NaN	NaN	0.822	0.993
1748	1.012	0.885	0.747	0.957	0.965	NaN	0.68	0.944	1.022	0.946	NaN	0.844	0.689	0.868	NaN	0.861	NaN	0.894	NaN	0.809	1.031	NaN	NaN	0.785	0.886
1749	0.855	0.954	0.819	1.046	1.001	NaN	0.982	0.953	1.327	0.98	NaN	0.842	0.819	0.855	NaN	0.744	NaN	0.863	NaN	0.619	0.882	NaN	NaN	0.87	0.778
1750	0.979	1.076	1.055	1.056	1.315	NaN	1.22	1.283	0.877	1.151	NaN	1.078	1.222	1.173	NaN	0.765	NaN	1.062	NaN	0.936	1.036	NaN	NaN	1.119	1.047
1751	0.943	0.983	1.028	1.095	1.228	1.086	1.073	1.201	1.379	1.033	NaN	0.981	1.277	1.102	NaN	0.932	NaN	1.075	NaN	1.044	1.083	NaN	NaN	0.877	1.22
1752	1.154	0.974	1.175	1.233	1.315	1.22	1.146	1.239	1.419	1.099	NaN	1.01	1.35	1.151	NaN	1.099	NaN	1.242	NaN	1.224	1.262	NaN	NaN	1.161	1.386
1753	1.202	1.085	1.076	1.18	1.302	1.204	1.205	1.282	1.233	1.229	NaN	1.128	1.507	1.225	NaN	1.227	NaN	1.341	NaN	1.347	1.143	NaN	NaN	1.26	1.499
1754	1.287	1.13	0.973	0.921	1.28	1.306	1.31	1.377	1.171	1.14	NaN	0.924	1.344	1.188	NaN	1.158	NaN	1.267	NaN	1.141	1.102	NaN	NaN	1.39	1.387
1755	1.209	1.061	0.902	1.078	1.221	1.512	1.439	1.428	0.896	1.322	NaN	1.347	1.141	1.287	NaN	1.174	NaN	1.196	NaN	1.474	1.074	NaN	NaN	1.396	1.299
1756	1.146	1.203	0.947	0.814	1.044	1.408	1.424	1.327	0.756	1.201	NaN	1.195	1.178	1.244	1.289	0.969	NaN	1.134	NaN	1.215	1.053	NaN	NaN	1.216	1.282
1757	1.177	0.943	0.963	0.937	0.964	1.172	1.081	1.316	1.051	1.004	NaN	1.045	1.022	1.149	0.979	0.926	NaN	0.96	0.995	1.06	1.227	NaN	NaN	1.356	1.005
1758	1.105	0.759	0.892	0.943	0.946	0.67	0.682	0.938	0.805	0.932	NaN	1.011	0.9	0.989	0.917	0.933	NaN	0.838	0.882	0.89	1.182	NaN	NaN	0.923	0.945
1759	1.153	1.035	1.133	1.287	1.052	0.929	1.072	1.172	1.19	1.179	NaN	1.137	1.055	1.176	0.845	1.119	NaN	0.984	1.13	1.084	1.013	NaN	NaN	1.187	1.042
1760	1.141	0.823	1.037	1.225	1.042	0.475	0.61	1.023	1.064	0.905	NaN	0.929	1	0.857	0.73	0.934	NaN	0.805	0.958	0.948	0.947	NaN	NaN	0.98	0.524
1761	1.084	0.854	1.066	1.449	1.089	0.649	1.001	1.072	1.085	1.062	NaN	0.99	1.265	1.021	0.738	1.004	NaN	0.957	0.933	1.012	1.038	NaN	NaN	1.1	0.811
1762	1.142	0.663	0.899	0.874	1.056	0.791	0.745	0.768	0.713	1.063	NaN	1.035	1.181	0.8	0.826	1.064	NaN	0.85	0.88	1.05	1.42	NaN	NaN	0.866	0.64
1763	1.086	0.827	1.115	1.141	1.145	1.002	1.007	1.097	0.943	0.8	NaN	0.916	1.02	0.991	0.998	1.037	NaN	0.861	1.044	1.216	1.226	NaN	NaN	1.113	0.624
1764	1.097	0.714	1.247	1.317	1.177	0.899	1.159	1.088	0.977	0.923	NaN	1.218	1.097	1.183	1.108	1.039	NaN	1.101	1.009	1.275	0.997	NaN	NaN	1.105	0.979
1765	1.05	0.796	1.09	1.296	1.141	1.1	0.936	0.995	0.958	0.892	NaN	1.251	1.134	1.163	1.234	0.909	NaN	1.126	0.94	1.037	0.925	NaN	NaN	0.885	0.912
1766	0.927	0.859	1.31	1.518	1.252	1.123	1.213	1.242	1.264	1.015	NaN	1.305	1.242	1.248	1.152	1.028	NaN	1.16	1.058	1.2	0.931	NaN	NaN	1.174	1.053
1767	0.798	0.771	1.156	1.545	1.191	1.177	1.124	1.226	1.074	1.087	NaN	1.454	1.117	1.33	1.383	1.026	NaN	1.188	1.371	1.312	0.826	NaN	1.057	1.026	1.093
1768	0.845	0.703	0.962	1.223	1.065	1.05	0.96	1.155	0.716	1.01	NaN	1.23	0.956	1.227	1.035	0.937	NaN	0.989	1.01	1.042	0.757	NaN	1.029	0.865	0.917
1769	0.913	0.79	0.986	1.059	1.02	1.134	1.058	1.138	0.897	0.992	NaN	1.185	1.222	0.974	1.209	0.924	NaN	1.148	1.068	0.845	0.841	NaN	0.957	0.954	1.201
1770	0.799	0.781	1.029	1.132	0.739	0.996	1.096	1.165	0.894	0.888	NaN	1.12	1.139	1.047	1.042	0.928	NaN	0.935	0.991	0.925	0.847	NaN	0.941	0.932	0.958
1771	0.703	0.476	0.921	0.792	0.577	0.604	0.703	0.808	0.783	0.761	NaN	0.587	0.954	0.74	0.912	0.702	NaN	0.812	0.617	0.488	0.702	NaN	0.74	0.683	0.769
1772	0.847	0.939	0.891	0.933	0.815	0.973	1.253	1.212	0.882	0.946	NaN	1.051	0.908	0.94	1.244	0.862	NaN	1.001	0.999	0.874	0.795	NaN	0.956	1.057	1.074
1773	0.907	0.74	0.993	0.806	0.776	1.192	1.154	1.197	0.705	1.087	NaN	1.08	0.813	1.132	1.17	0.846	NaN	1.082	0.78	0.703	0.854	NaN	1.007	1.027	1.108
1774	0.912	0.679	0.965	0.693	0.657	1.33	1.182	1.012	0.836	0.919	NaN	1.086	0.734	1.032	1.091	0.721	NaN	0.967	0.355	0.269	0.837	NaN	0.723	0.778	0.921
1775	0.983	0.515	0.667	0.936	0.677	1.345	0.704	0.931	0.83	0.954	NaN	0.967	0.727	0.978	0.935	0.778	NaN	0.928	0.527	0.5	1.249	NaN	0.861	0.803	0.8
1776	1.035	0.698	1.06	1.1	0.942	1.34	1.129	1.135	0.979	1.021	NaN	1.21	1.025	1.003	1.276	0.963	NaN	0.944	0.801	0.783	1.301	NaN	1.117	1.111	1.017
1777	1.17	0.853	0.973	1.087	0.964	1.331	1.239	1.163	0.985	0.962	NaN	0.949	1.117	1.065	1.142	0.972	NaN	0.934	0.833	0.737	1.393	NaN	1.1	1	1.08
1778	1.229	1.002	0.972	1.239	1.028	1.192	1.176	1.148	1.145	0.879	NaN	1.065	1.388	1.158	1.14	0.977	NaN	1.058	0.819	0.875	1.305	NaN	0.889	0.947	1.164
1779	1.029	1.023	0.833	1.276	0.906	1.451	1.321	1.251	1.235	0.996	NaN	1.246	1.528	1.3	1.293	0.955	NaN	1.168	1.044	1.268	1.212	NaN	1.002	0.94	1.436
1780	1.053	0.719	1.004	1.055	0.916	1.066	1.16	0.882	0.913	0.868	NaN	1.011	1.169	1.063	1.119	0.961	NaN	0.787	1.127	1.078	1.01	NaN	0.92	0.701	1.141
1781	1.052	0.692	0.525	0.642	0.743	0.698	0.922	0.818	0.628	0.547	NaN	0.581	1.182	0.682	0.473	0.871	NaN	0.851	0.719	0.702	0.621	NaN	0.624	0.686	0.623
1782	1.108	0.697	0.793	0.82	0.898	0.778	0.971	0.907	0.783	0.851	NaN	0.796	1.134	0.858	0.714	0.997	NaN	0.852	1.02	0.998	0.863	NaN	0.968	0.923	1.014
1783	1.09	0.662	0.703	0.749	0.883	0.429	0.695	0.701	0.885	0.697	NaN	0.457	1.023	0.711	0.552	0.946	NaN	0.694	0.818	0.8	0.769	NaN	1.015	0.739	0.698
1784	1.072	0.732	0.825	0.676	0.93	0.782	0.94	0.832	0.806	0.863	NaN	0.92	1.061	0.808	0.701	1.013	NaN	0.834	0.976	0.848	0.928	NaN	0.931	1.021	0.945
1785	0.94	0.821	0.749	0.735	0.969	0.925	1.051	0.894	0.858	0.781	NaN	0.889	1.035	0.795	0.642	0.898	NaN	0.768	1	0.946	0.87	NaN	0.898	0.985	0.772
1786	0.909	0.759	0.711	0.461	0.977	0.936	0.756	0.58	0.874	0.8	NaN	0.779	0.885	0.613	0.536	0.866	NaN	0.863	0.845	0.723	0.804	NaN	0.603	0.768	0.782
1787	0.955	0.844	0.806	0.666	0.964	1.219	0.882	0.769	1.143	0.823	NaN	0.929	0.897	0.86	0.509	0.817	NaN	0.992	0.957	0.934	0.88	NaN	0.767	0.956	0.902
1788	0.973	0.632	0.657	0.575	0.753	0.746	0.657	0.563	0.829	0.792	NaN	0.67	0.824	0.745	0.399	0.684	NaN	0.818	0.691	0.58	0.829	NaN	0.524	0.681	0.729
1789	0.84	0.57	0.891	0.823	0.8	1.115	0.901	0.78	1.06	0.895	NaN	0.763	0.754	0.936	0.595	0.67	NaN	0.824	1.033	0.743	0.901	NaN	0.7	0.857	0.748
1790	0.712	0.484	0.853	0.917	0.84	0.742	0.573	0.623	0.816	0.709	NaN	0.802	0.904	0.984	0.56	0.673	NaN	0.893	1.153	0.975	0.679	NaN	0.991	0.691	0.955
1791	0.756	0.597	0.925	0.99	1.12	1.019	0.91	0.9	1.005	1.002	NaN	1.001	1.14	1.201	0.868	0.844	NaN	1.262	1.164	1.204	0.864	NaN	0.898	0.845	1.143
1792	0.763	0.603	0.955	1.063	0.981	0.768	0.61	0.918	1.137	1.011	NaN	1.061	1.113	1.256	1.002	0.907	NaN	1.266	1.168	1.152	0.982	NaN	0.834	0.96	1.031
1793	0.895	0.787	0.945	1.101	0.992	1.134	0.868	1.014	0.895	1.008	NaN	1.082	1.267	1.249	1.048	0.873	NaN	1.309	1.174	1.144	1.122	NaN	0.862	1.048	1.136
1794	0.995	0.706	0.94	1.189	1.149	1.163	0.963	1.155	1.072	1.132	NaN	1.225	1.315	1.236	1.407	1.063	NaN	1.491	1.255	1.267	1.029	NaN	1.086	1.118	1.29
1795	0.99	0.634	0.776	1.04	1.015	1.034	0.681	0.997	0.819	0.978	NaN	1.062	1.168	1.143	1.131	0.91	NaN	1.176	1.128	1.233	0.662	NaN	0.871	1.021	1.036
1796	0.926	0.706	0.643	0.876	0.912	0.972	0.969	1.118	0.872	1.028	NaN	0.879	1.046	1.093	1.108	0.945	NaN	1.149	1.164	1.152	0.918	NaN	0.771	1.093	1.178
1797	1.008	0.804	0.818	0.982	1.015	1.219	1.194	1.146	0.998	1.065	NaN	1.037	0.929	1.132	1.248	0.999	NaN	1.174	1.181	1.197	0.956	NaN	0.89	1.063	1.3
1798	0.983	0.412	0.818	0.798	0.965	0.873	0.817	0.752	1.081	0.922	NaN	0.601	0.808	0.952	0.896	0.862	NaN	1.004	0.918	0.993	0.902	NaN	0.782	0.813	0.763
1799	1.081	0.776	0.846	0.787	0.945	1.046	1.098	1.068	1.075	1.092	NaN	0.892	1.008	0.958	1.194	1.02	NaN	0.936	1.158	1.139	1.119	NaN	0.891	0.892	1.114
1800	0.921	0.692	0.668	0.671	0.699	0.782	1.082	1.002	0.973	1.085	NaN	0.991	1.074	0.899	1.073	0.916	NaN	1.067	1.071	1.144	1.009	NaN	0.875	0.804	1.025
1801	0.875	0.603	0.677	0.643	0.628	0.835	0.902	0.843	0.714	1.053	NaN	0.946	0.887	0.705	0.827	0.933	NaN	0.886	0.854	0.959	1.05	NaN	0.713	0.574	0.675
1802	0.966	0.754	0.656	0.746	0.793	0.916	0.974	0.977	1.069	1.065	NaN	1.038	0.834	0.892	0.956	0.813	NaN	1.058	0.949	0.989	0.987	NaN	0.873	0.786	0.948
1803	0.866	0.473	0.648	0.702	0.796	0.726	0.876	0.995	1.007	1.087	NaN	1.023	0.782	0.806	0.89	0.83	NaN	0.945	0.831	0.787	0.901	NaN	0.853	0.904	0.84
1804	0.974	0.634	0.76	0.861	0.841	0.972	0.967	1.075	1.138	1.019	NaN	1.021	0.863	0.871	1.038	0.945	NaN	1.051	1.021	1.032	1.101	NaN	0.984	1.115	0.853
1805	1.073	0.725	0.713	0.941	0.893	1.096	1.092	1.157	1.13	1.057	1.212	1.046	0.899	0.933	1.075	0.943	NaN	1.037	1.161	1.085	1.312	NaN	1.051	1.085	1.094
1806	0.859	0.829	0.685	0.93	0.769	0.886	0.782	0.981	0.904	1.058	1.026	0.905	0.851	0.777	0.864	0.782	NaN	1.136	0.961	0.755	1.165	NaN	0.876	0.841	1.029
1807	1.021	0.512	0.889	0.849	0.849	0.862	0.801	1.004	0.912	0.809	1.091	0.885	0.816	0.944	0.803	0.847	NaN	1.162	0.859	0.837	1.003	NaN	0.777	0.841	0.919
1808	0.877	0.499	0.835	0.84	0.864	0.879	0.954	0.984	0.956	0.837	1.061	0.904	0.796	0.692	0.889	0.739	0.777	1.095	0.792	0.802	0.861	NaN	0.813	0.982	0.861
1809	0.935	0.469	0.876	1.007	0.92	1	0.879	1.027	0.919	0.847	1.342	0.974	0.881	0.971	1.055	0.881	1.011	1.142	1.028	0.867	0.965	NaN	1.066	0.974	0.918
1810	0.872	0.47	0.88	1.006	0.852	0.964	0.903	0.99	1.003	0.697	1.161	0.926	0.818	0.938	1.03	0.92	0.989	0.99	1.052	0.885	0.856	NaN	1.098	0.941	0.859
1811	0.914	0.471	0.957	0.965	0.832	0.838	0.649	0.84	0.954	0.779	0.697	0.705	0.797	0.917	0.908	0.906	1.011	0.843	0.974	0.917	0.933	NaN	0.896	0.796	0.8
1812	1.051	0.566	1.003	0.879	0.926	0.733	0.778	0.837	1.026	0.781	0.847	0.678	0.787	1.004	0.765	0.899	0.948	0.794	0.963	0.929	1.054	NaN	0.857	0.95	0.691
1813	1.008	0.839	0.947	0.45	0.986	0.911	0.935	0.871	1.06	0.7	1.12	0.839	0.911	1.238	0.904	0.836	1.13	0.961	1.089	1.077	0.904	NaN	0.97	1.066	0.714
1814	0.959	0.75	0.918	0.636	0.933	0.882	0.899	0.915	1.144	0.763	1.026	0.767	0.822	1.061	0.874	0.936	1.042	0.975	1.068	1.046	1.026	NaN	0.933	1.098	0.746
1815	0.927	0.913	0.892	0.814	0.96	0.968	1.053	1.105	0.927	0.911	1.114	1.052	0.815	1.18	1.11	0.93	1.147	1.035	1.082	1.155	0.99	NaN	0.959	1.127	0.904
1816	0.718	0.758	0.949	0.713	0.954	0.824	0.851	0.979	0.922	0.734	0.915	0.894	0.771	0.95	0.817	0.874	1.165	0.993	0.954	0.882	0.908	NaN	0.812	1.019	0.661
1817	0.898	0.926	1.065	1.011	1.044	1.354	1.127	1.254	1.136	0.997	1.212	1.242	1.061	1.362	1.064	0.9	1.308	1.169	1.207	1.127	1.064	NaN	1.002	1.253	0.933
1818	0.916	0.679	1.004	0.784	1.066	0.698	0.635	0.924	0.759	0.933	0.793	0.896	0.755	0.873	0.668	0.894	0.917	0.899	0.794	0.471	1.144	NaN	0.813	1.004	0.562
1819	1.012	0.552	0.983	0.703	1.132	0.805	0.453	0.781	0.989	0.785	0.837	1.055	0.779	0.728	0.759	0.911	1.064	0.88	0.718	0.457	1.11	NaN	0.745	0.622	0.759
1820	0.874	0.667	0.828	0.718	0.913	0.738	0.84	0.947	0.929	0.9	0.899	1.016	0.963	0.987	0.957	0.916	1.071	1.136	0.832	0.653	0.967	NaN	0.834	0.999	0.835
1821	0.971	0.828	0.744	0.911	0.963	0.708	0.812	0.903	0.972	0.828	0.944	0.953	1.176	0.886	0.997	0.888	0.805	1.097	0.826	0.656	0.89	NaN	0.879	1.062	0.816
1822	0.956	0.743	0.747	0.688	0.882	0.561	0.659	0.779	0.678	0.627	0.645	0.656	1.126	0.708	0.754	0.817	0.602	0.93	0.609	0.571	0.745	NaN	0.74	0.828	0.588
1823	0.955	0.83	0.713	0.542	0.957	0.763	0.939	0.831	0.861	0.776	0.65	0.891	1.069	0.885	0.867	0.843	0.522	1.053	0.708	0.782	0.927	NaN	0.763	0.903	0.663
1824	0.969	0.726	0.761	0.653	0.933	0.385	0.698	0.583	0.843	0.868	0.579	0.916	1.176	0.693	1.01	0.815	0.818	1.161	0.778	0.784	0.856	NaN	0.952	0.774	0.861
1825	0.919	0.829	0.782	0.768	0.877	0.787	0.977	0.835	0.963	0.761	0.731	0.875	1.086	0.865	0.998	0.998	0.88	1.133	0.937	0.763	0.996	NaN	0.992	0.856	0.883
1826	0.932	0.562	0.833	0.794	0.952	0.438	0.468	0.641	0.892	0.902	0.431	0.65	0.884	0.672	0.759	1.033	0.635	0.8	0.716	0.687	1.034	NaN	0.906	0.549	0.6
1827	0.79	0.548	0.945	1.129	0.977	0.601	0.679	0.705	1.19	0.982	0.519	0.771	0.78	0.87	0.802	1.132	0.985	0.874	0.929	0.774	1.141	NaN	1.093	0.74	0.762
1828	0.884	0.616	0.983	1.249	1.064	0.731	0.749	0.819	1.342	0.991	0.663	0.957	0.925	0.887	0.827	1.198	1.101	1.046	0.93	0.852	1.157	NaN	1.129	0.869	0.776
1829	0.865	0.428	0.957	0.968	0.797	0.417	0.764	0.625	1.19	0.842	0.456	0.664	0.917	0.45	0.573	0.957	0.797	0.768	0.652	0.622	1.099	NaN	0.801	0.787	0.532
1830	0.908	0.766	0.814	1.187	0.82	0.652	0.919	0.761	1.386	1.097	0.915	0.974	1.053	0.89	0.864	0.994	1.183	1.051	1.038	1.005	0.984	NaN	1.096	0.976	0.811
1831	0.791	0.882	0.809	1.176	0.776	0.801	1.025	0.847	1.091	1.065	1.041	1.007	0.938	1.066	0.723	0.956	1.255	0.927	1.015	1.018	0.641	NaN	1.057	1.023	0.769
1832	0.699	1.048	0.896	1.054	0.708	1.087	1.214	1.005	1.169	1.056	1.093	0.877	1.019	1.121	0.842	0.932	1.114	1.106	1.066	1.068	0.533	NaN	0.898	0.951	0.974
1833	0.726	0.936	0.913	0.956	0.906	0.794	0.823	0.818	0.899	1.083	1.046	0.873	0.934	0.931	0.984	0.966	0.995	1.055	1.095	1.146	0.795	NaN	1.016	0.792	0.883
1834	0.833	0.952	1.001	0.983	1.095	1.153	1.099	1.043	0.948	1.262	1.212	1.221	1.249	1.095	1.169	1.119	0.961	1.22	1.296	1.301	0.695	NaN	1.114	0.972	1.27
1835	0.677	0.885	0.891	0.991	0.874	0.856	1.232	1.006	1.069	1.112	1.017	0.987	1.133	1.144	1.22	0.986	0.844	1.071	1.178	1.221	0.617	NaN	0.922	1.013	1.077
1836	0.76	0.882	0.871	0.993	1.008	0.889	0.868	0.967	0.821	1.022	0.905	1.182	1.01	0.96	1.042	1.031	0.841	1.051	1.078	1.133	0.827	NaN	1.037	0.922	1.004
1837	0.858	0.88	0.822	0.974	0.979	0.92	0.941	0.958	0.881	1.051	0.837	1.033	0.97	0.962	1.084	1.076	0.811	0.964	1.011	1.159	0.826	NaN	1.078	0.945	1.011
1838	0.92	0.626	0.777	0.841	0.845	0.678	0.818	0.749	0.812	0.946	0.856	0.769	0.83	0.675	0.755	0.87	0.789	0.856	0.774	0.811	0.95	NaN	0.88	0.83	0.836
1839	0.846	0.79	0.757	0.927	0.879	0.905	0.809	0.811	0.899	0.908	0.991	0.845	0.914	0.935	0.993	0.809	0.843	1.019	0.899	1.047	0.81	NaN	1.022	1.071	1.054
1840	1.108	0.93	0.615	0.81	0.814	1.072	0.892	0.884	0.813	1.213	1.027	0.965	1.008	0.929	1.192	0.758	1.121	1.125	0.864	0.995	0.823	NaN	0.932	1.063	1.272
1841	1.081	0.947	0.667	0.842	0.677	1.092	0.863	0.849	0.955	1.046	1.025	0.927	1.008	1.002	1.03	0.82	1.206	0.988	0.77	0.866	0.721	NaN	0.784	0.912	1.132
1842	0.926	0.892	0.85	0.946	0.979	1.028	0.759	0.781	0.86	1.03	0.933	0.872	1.001	0.978	1.107	0.936	0.994	1.035	0.92	1.004	0.818	NaN	1.007	0.8	1.187
1843	0.893	0.889	0.888	0.851	0.949	0.903	0.769	0.694	0.803	0.935	0.841	0.665	0.906	0.732	0.979	0.827	0.792	0.754	0.737	0.979	0.856	NaN	0.814	0.652	1.057
1844	1.066	0.85	0.79	1.071	0.927	0.992	1.076	0.823	1.047	1.004	0.991	1.043	1.026	0.821	1.211	0.882	0.805	1.037	0.768	1.153	0.86	NaN	0.938	0.937	1.365
1845	0.796	0.651	0.846	1.014	0.867	0.772	0.682	0.609	1.083	0.721	0.824	0.766	0.962	0.826	0.979	0.797	0.992	0.745	0.729	1.081	0.885	1.024	0.99	0.803	0.949
1846	1.089	0.753	0.769	0.951	0.987	0.658	0.639	0.641	0.986	1.047	0.812	0.923	0.851	0.974	0.959	0.9	1.081	0.811	0.952	1.17	0.941	0.963	0.983	0.832	0.941
1847	1.101	0.742	0.915	0.684	0.814	0.721	0.864	0.75	0.762	0.775	0.786	0.696	0.746	0.84	0.826	0.731	0.946	0.712	0.92	0.819	0.73	0.727	0.719	0.924	0.989
1848	1.249	0.857	0.866	0.92	0.908	0.911	0.749	0.897	0.903	0.768	1.058	0.964	0.905	1.016	1.051	0.844	1.136	0.916	1.049	1.125	0.778	0.793	0.978	1.1	1.109
1849	1.326	1.012	0.685	0.829	0.839	1.053	0.825	0.726	0.596	0.832	1.057	1.021	0.997	0.983	0.965	0.816	0.866	1.044	0.937	1.182	0.814	0.785	0.777	0.928	1.089
1850	1.247	0.823	0.774	0.8	0.881	0.834	0.779	0.621	0.831	0.909	0.884	0.835	0.991	0.928	0.877	0.833	1.05	0.987	1.006	1.05	0.963	1.08	0.691	0.775	0.919
1851	1.532	0.871	0.78	0.818	0.885	0.846	0.961	0.812	1.097	1.112	0.978	1.034	0.988	1.091	1.08	0.88	1.364	1.152	1.145	1.128	0.991	1.124	0.703	0.891	1.015
1852	1.188	0.702	0.747	0.658	0.722	0.693	0.861	0.771	0.87	0.976	0.906	0.981	0.967	0.87	0.975	0.786	1.12	1.026	0.919	1.07	0.882	0.857	0.684	0.816	0.835
1853	0.947	0.632	0.763	0.527	0.47	0.489	0.612	0.651	0.724	0.671	0.565	0.655	0.721	0.442	0.61	0.647	0.737	0.769	0.749	0.68	0.678	0.723	0.457	0.695	0.531
1854	1.26	1.044	0.904	0.765	0.672	0.764	0.791	0.822	0.88	0.888	0.914	0.857	0.893	0.672	0.884	0.801	0.903	0.974	0.905	0.95	0.866	0.784	0.615	1.065	0.748
1855	1.008	0.9	0.914	0.833	0.768	0.783	0.778	0.722	0.95	0.939	0.888	0.99	0.824	0.919	0.819	0.846	0.973	0.877	1.025	0.955	0.991	0.921	0.763	1.043	0.72
1856	1.231	1.056	0.8	0.963	0.799	0.855	0.834	0.781	0.981	0.936	0.967	0.912	0.954	0.965	0.906	0.875	1.055	1.031	1.118	0.973	1.085	0.964	0.872	1.119	0.944
1857	1.24	1.092	0.866	0.964	0.888	0.884	0.695	0.647	0.759	0.942	0.713	1.074	1.002	0.853	0.884	0.947	0.729	1.096	1.074	1.11	1.102	0.812	0.859	0.759	0.796
1858	1.012	0.824	0.958	1.003	0.935	1.023	0.791	0.786	0.975	0.89	0.935	0.982	0.863	1.003	0.985	0.778	1.057	0.868	0.904	1.007	1.109	1.049	0.784	1.042	0.85
1859	0.936	0.81	0.888	0.981	0.934	0.672	0.884	0.802	0.757	0.778	0.764	0.721	0.72	0.714	0.624	0.816	0.582	0.728	0.88	0.684	0.919	1.05	0.961	1.123	0.732
1860	1.286	1.27	0.922	1.102	0.927	1.114	1.076	0.871	1.003	1.025	1.007	1.054	0.955	0.984	1.107	1.001	1.06	0.857	0.884	0.744	1.044	1.097	1.024	1.245	0.984
1861	1.267	1.116	0.876	0.869	0.815	0.796	0.809	0.655	0.801	0.781	0.686	0.842	0.879	0.697	0.819	0.894	0.976	0.802	0.761	0.636	0.725	0.787	0.712	1.037	0.697
1862	1.434	1.144	0.991	1.033	0.922	1.001	1.113	0.894	0.91	0.887	0.976	0.967	0.965	0.889	0.951	0.956	1.112	0.98	1.032	0.876	0.729	0.828	0.766	1.391	1.012
1863	1.311	1.061	0.866	1.019	0.957	1.068	0.951	0.893	0.858	0.806	0.797	0.878	0.982	0.914	0.985	0.884	0.988	1.034	0.886	0.783	0.839	1.081	0.822	1.193	0.881
1864	1.221	1.186	0.865	0.916	0.902	1.026	1.086	0.783	0.912	0.881	0.906	0.9	1.038	0.915	1.021	0.863	0.849	1.059	0.954	0.715	0.924	1.107	0.861	1.194	1.05
1865	1.395	1.04	0.827	0.974	0.921	1.057	0.991	0.827	0.934	0.926	0.899	1.04	1.192	0.941	0.992	0.972	0.896	1.046	1.051	0.908	0.968	1.131	0.902	1.237	1.079
1866	1.354	1.399	0.984	1.029	1.012	1.107	1.014	0.992	0.885	1.063	1.11	1.234	1.28	1.041	1.132	1.121	1.269	1.291	0.995	0.89	1.099	0.995	0.868	1.309	1.129
1867	1.186	1.474	0.82	0.855	0.894	1.264	1.137	0.87	0.912	1.003	1.163	1.032	1.163	1.023	1.155	0.866	1.063	1.181	0.908	0.819	0.929	1.044	0.696	1.118	1.109
1868	1.193	1.03	0.767	0.727	0.9	0.867	0.821	0.634	0.851	0.95	0.767	0.924	1.123	0.786	0.988	0.836	0.861	1.138	0.76	0.847	1.127	0.938	0.635	0.607	0.978
1869	1.207	1.248	0.851	0.794	0.995	1.022	1.104	0.646	0.941	0.948	0.833	1.11	1.118	0.982	1.192	0.917	0.956	1.105	1.005	0.987	0.971	1.145	0.647	0.807	1.016
1870	1.287	1.105	0.935	1.062	1.089	1.152	1.022	0.716	0.996	0.929	1.005	0.97	0.866	1.038	1.136	1	0.631	0.98	1.048	1.047	0.984	1.155	0.686	0.943	0.969
1871	1.241	1.247	0.813	0.957	0.961	1.173	1.171	0.757	0.844	0.968	1.003	1.045	1.013	0.863	0.976	0.972	0.893	0.986	0.997	1.084	0.823	0.932	0.568	0.901	1.062
1872	1.094	1.259	0.968	1.018	1.143	1.142	1.062	0.708	1.108	0.982	0.909	1.123	0.984	0.999	0.996	0.96	1.145	0.95	1.049	1.043	0.829	1.025	0.707	0.948	1.059
1873	1.341	0.877	0.903	0.824	1.051	0.994	1.072	0.609	1.034	0.889	0.837	1.036	0.899	0.898	0.886	0.903	0.976	0.769	1.053	1.057	0.853	0.975	0.673	0.726	0.937
1874	1.252	0.783	0.811	0.936	0.924	0.653	0.749	0.604	0.889	0.586	0.714	0.706	0.972	0.758	0.777	0.703	0.825	0.881	0.751	0.711	0.723	0.979	0.605	0.74	0.976
1875	0.876	0.809	0.907	1.05	1.02	0.906	0.768	0.696	0.916	0.952	0.878	1.127	1.022	1.067	1.019	0.927	0.984	0.906	1.219	1.006	0.929	1.081	0.778	1.023	1.097
1876	1.044	0.836	0.795	0.931	0.908	0.744	1.059	0.616	0.8	0.828	0.839	0.962	0.78	0.891	0.873	0.883	0.967	0.773	0.97	1.031	0.972	0.947	0.685	0.965	0.889
1877	1.089	0.909	0.865	1.052	0.948	0.776	1.015	0.639	0.975	0.862	0.889	0.953	0.829	0.919	0.787	0.909	1.055	0.845	1.047	1.102	1.053	0.99	0.79	1.096	1.004
1878	1.101	0.974	0.841	1.157	1.1	0.746	0.845	0.67	0.968	0.972	1.03	1.115	0.943	1.115	0.952	1.088	1.028	1.085	1.283	1.152	1.005	1.032	1.019	1.203	1.034
1879	1.237	0.787	0.891	0.839	0.931	0.791	0.834	0.589	0.946	0.873	0.742	1.013	0.915	1.001	0.773	0.917	1.01	0.895	1.135	0.941	0.95	0.913	0.748	0.836	0.946
1880	1.287	0.877	0.839	0.882	1.027	0.909	0.879	0.716	0.921	0.576	1.011	0.815	0.845	0.906	0.944	0.924	0.966	1.052	1.191	0.92	0.822	1.003	0.867	1.027	1.051
1881	1.149	0.893	0.866	0.852	0.92	0.862	0.719	0.822	0.87	0.502	0.9	0.797	0.765	0.929	0.866	0.831	0.895	0.992	0.916	0.876	0.811	0.757	0.766	0.923	0.908
1882	1.293	1.023	0.992	1.145	0.993	1.24	1.048	0.996	0.977	0.664	1.207	1.21	1.053	1.215	1.166	0.948	0.888	1.28	1.185	1.161	1.032	1.107	0.987	1.044	1.152
1883	1.167	1.163	0.886	0.722	0.766	0.863	0.935	0.692	0.867	0.814	0.722	0.746	0.958	0.827	0.77	0.792	0.902	0.899	0.95	0.897	0.94	0.806	0.606	0.666	0.756
1884	1.229	1.225	1.06	1.133	1.004	1.115	1.22	1.01	1.093	0.916	1.132	0.988	1.047	1.16	1.111	1.006	0.918	1.165	1.241	1.032	1.001	1.237	0.917	1.12	1.083
1885	1.159	0.903	1.053	1.107	1.038	0.955	0.88	0.883	1.128	0.974	0.905	1.171	0.974	1.252	1.081	1.041	0.993	1.059	1.096	1.01	0.998	1.294	0.872	0.94	0.899
1886	1.273	0.979	1.007	1.028	0.898	1.213	0.849	0.883	1.105	0.98	1.02	1.249	1.002	1.059	1.136	0.999	1.077	1.107	1.179	1.125	1.032	1.25	0.827	0.921	1.104
1887	1.141	0.977	0.801	0.796	0.845	0.873	0.879	0.721	0.83	0.849	0.6	1.075	0.994	0.864	0.926	0.989	0.839	1.045	0.83	0.924	0.932	0.897	0.645	0.865	0.977
1888	1.181	0.871	0.927	0.694	0.756	0.853	0.841	0.648	0.887	0.661	0.564	0.959	0.904	0.928	0.883	0.848	0.916	0.909	0.806	0.867	0.858	0.897	0.63	0.742	0.969
1889	0.875	0.715	0.875	0.813	0.836	0.655	0.681	0.554	0.959	0.778	0.437	0.855	0.996	0.782	0.778	0.908	0.77	0.868	0.875	0.781	1.139	0.9	0.795	0.598	0.886
1890	1.388	0.903	0.998	0.841	0.816	1.047	1.095	0.681	1.067	0.892	0.589	1.125	1.255	1.128	0.972	1.038	1.154	1.181	1.115	0.944	1.149	0.985	0.717	0.855	1.099
1891	1.313	1.067	0.902	0.756	0.784	0.896	0.809	0.688	0.874	0.7	0.706	0.956	1.126	1.218	0.831	0.969	1.083	1.109	0.903	0.879	0.823	0.813	0.663	0.756	0.925
1892	1.392	1.247	0.911	1.005	0.907	1.121	1.064	0.761	1.143	0.945	1.085	1.136	1.142	1.282	1.028	1.033	1.252	0.995	1.158	1.029	0.979	0.949	0.904	0.944	1.181
1893	1.252	0.625	0.913	1.022	0.948	1.001	1.035	0.81	1.079	0.99	1.102	0.949	0.869	1.028	1.075	1.07	0.806	0.733	1.104	1.071	0.923	0.995	1.008	1.072	0.966
1894	1.32	1.222	1.06	1.115	1.123	1.311	1.307	0.812	1.175	1.151	1.213	1.215	1.218	1.292	1.291	1.231	1.198	1.355	1.29	1.289	0.869	1.048	1.199	1.177	1.317
1895	1.166	0.702	1.027	1.046	1.074	0.935	0.803	0.662	1.019	0.992	0.931	0.809	1.01	0.863	0.835	1.099	0.92	0.956	1.057	0.981	0.895	0.846	1.085	1.005	0.813
1896	1.003	0.718	1.035	1.095	1.18	0.928	0.891	0.58	0.857	1.174	1.023	0.798	0.983	0.895	0.834	1.181	1.075	0.993	1.19	1.058	1.064	0.999	1.245	0.904	0.903
1897	0.974	0.954	1.102	1.057	1.048	1.149	1.285	0.746	0.931	1.028	1.076	1	1.181	1.158	1.092	1.192	0.991	1.18	1.193	1.105	0.874	0.914	1.263	1.054	1.081
1898	0.988	1.175	1.153	1.115	0.936	1.184	1.404	0.754	1.159	1.142	1.158	1.182	1.227	1.289	1.196	1.2	1.222	1.167	1.274	1.184	0.887	1.067	1.331	1.02	1.133
1899	0.979	1.181	1.03	1.088	0.957	0.916	1.148	0.776	0.969	1.02	1.123	1.093	0.897	1.001	1.034	1.147	0.835	0.857	1.157	1.056	0.821	0.947	1.26	0.948	0.918
1900	0.904	0.979	1.034	1.001	1.013	1.15	1.21	0.827	0.944	1.199	1.087	1.049	1.071	1.075	0.99	1.188	0.786	1.075	1.068	1.034	0.853	0.883	1.165	1.019	0.978
1901	0.968	1.071	1.008	0.924	0.969	0.888	1.243	0.906	0.858	1.049	0.895	0.816	1.096	0.886	0.71	1.173	0.818	0.762	0.837	0.9	1.014	0.751	1.082	0.973	0.701
1902	1.021	1.012	0.816	0.8	0.833	0.779	1.065	0.891	0.901	0.953	0.772	0.85	0.928	0.923	0.705	1.024	0.861	0.663	0.764	0.811	0.854	0.752	0.969	0.954	0.689
1903	1.242	0.974	0.958	1.05	0.957	0.907	1.182	1.174	0.899	0.982	0.985	1.004	0.964	1.123	0.804	1.012	0.881	0.975	0.9	0.996	0.876	1.026	1.07	1.04	0.816
1904	1.246	0.976	0.84	0.84	0.894	0.736	1.011	1.226	0.718	1.038	1.01	0.807	1.13	0.829	0.716	0.977	0.785	0.982	0.697	0.871	0.962	0.87	0.915	1.029	0.798
1905	1.185	0.819	0.947	0.745	0.761	0.691	0.906	1.039	0.908	0.908	0.911	0.841	1.052	0.768	0.734	0.869	0.769	0.9	0.813	0.898	1.072	0.727	0.862	0.852	0.61
1906	1.054	0.952	0.96	0.81	0.678	0.886	1.082	1.139	0.982	1.17	0.97	0.984	1.245	1.002	0.799	0.882	0.863	0.885	0.809	0.997	1.046	0.848	0.735	0.955	0.715
1907	1.169	1.184	0.97	1.042	0.742	0.956	1.266	1.327	1.178	1.243	1.143	1.04	1.302	1.128	0.928	1.058	1.054	1.024	0.997	1.018	1.162	1.186	1.025	1.098	0.916
1908	1.082	1.109	1.012	0.971	0.749	1.022	1.121	1.315	1.147	1.119	1.218	0.882	1.308	1.056	0.896	1.053	0.981	0.988	1.096	1.01	1.019	1.037	1.106	1.019	0.939
1909	1.033	1.168	1.053	0.958	0.792	1.135	1.166	1.358	1.157	0.976	1.215	0.796	1.381	1.116	0.949	0.956	1.057	0.997	1.099	1.062	0.864	1.102	1.093	1.054	1.059
1910	0.902	1.214	1.229	1.139	0.836	1.033	1.161	1.491	1.173	1.135	1.245	1.031	1.373	1.155	1.016	1.009	0.926	1.265	1.13	1.116	0.935	1.061	1.222	1.088	1.209
1911	1.007	0.878	1.033	0.764	0.769	0.877	0.809	1.082	0.877	0.997	0.876	0.823	1.064	0.741	0.81	0.943	0.829	0.972	0.775	0.838	0.91	0.632	0.935	0.759	0.991
1912	1.133	1.234	1.06	0.906	0.885	1.072	0.984	1.209	0.965	1.141	1.142	0.977	1.067	1.131	0.971	1.117	1.002	1.152	1.051	0.98	1.012	0.725	1.088	0.964	1.142
1913	1.116	0.946	1.097	0.925	0.812	0.884	0.819	1.131	0.993	1.058	0.802	0.791	1.112	1.072	0.821	1.02	0.726	1.14	0.902	0.903	1.119	0.791	1.073	0.699	0.928
1914	1.192	0.959	1.102	0.912	1.059	0.89	0.903	1.263	0.867	1.052	0.983	0.75	0.981	0.647	0.854	0.917	0.691	0.891	0.751	0.728	1.012	0.78	1.054	0.791	0.831
1915	1.343	0.949	0.822	0.982	1.046	0.963	0.81	1.237	0.951	0.989	1.035	0.962	0.982	0.897	0.96	1.015	0.712	0.915	0.876	0.899	1.047	0.89	1.146	0.933	0.976
1916	1.153	1.131	1.041	1.053	1.033	0.986	0.938	1.314	1.033	1.072	1.033	1.036	0.981	1.001	0.863	1.052	0.982	0.981	0.958	0.988	0.986	1.026	1.192	0.85	0.953
1917	0.969	0.716	0.985	0.998	0.94	0.716	0.713	1.044	0.819	0.806	0.838	0.708	0.774	0.685	0.625	0.971	0.626	0.662	0.632	0.697	0.912	0.77	0.953	0.561	0.646
1918	1.029	0.827	0.912	1.038	1.031	0.72	0.76	1.182	0.736	1.105	1.036	0.741	0.764	0.673	0.71	0.882	0.754	0.924	0.759	0.628	0.987	0.816	1.059	0.507	0.809
1919	0.975	0.998	1.017	0.806	0.92	0.795	0.956	1.277	0.612	1.153	1.054	0.828	0.962	0.904	0.84	0.921	0.874	1.016	0.824	0.754	1.139	0.877	1.165	0.77	0.819
1920	1.209	1.094	0.95	1.041	0.989	0.899	0.973	1.233	0.944	1.125	1.149	0.808	0.987	1.044	0.88	1.002	1.053	0.938	1.021	0.851	1.065	1.105	1.245	0.904	0.973
1921	1.371	0.911	1.079	1.348	1.069	0.821	0.71	1.241	0.894	1.158	1.028	0.811	1.019	0.857	0.852	1.116	1.023	0.976	1.083	0.844	1.228	1.212	1.484	0.924	0.933
1922	1.519	1.056	1.032	1.306	1.186	1.059	0.823	1.318	0.976	1.267	1.126	1.047	0.989	0.961	0.969	1.164	1.091	1.063	1.129	0.928	1.407	1.06	1.505	1.031	1.088
1923	1.475	1.276	1.004	1.344	1.116	1.253	1.088	1.409	1.104	1.268	1.223	1.137	1.098	1.133	1.189	1.085	1.17	1.203	1.228	1.127	1.292	1.142	1.439	1.181	1.224
1924	1.614	1.32	1.17	1.33	1.098	1.398	1.197	1.544	1.052	1.253	1.323	1.108	1.12	1.222	1.228	1.078	1.202	1.229	1.265	1.152	1.361	1.066	1.441	1.325	1.247
1925	1.46	1.405	1.157	1.153	0.98	1.307	1.297	1.674	1.041	1.124	1.427	0.981	1.066	1.258	1.137	0.979	1.221	1.18	1.117	1.113	1.249	0.919	1.337	1.285	1.151
1926	1.154	1.217	1.26	1.27	0.901	1.253	1.257	1.586	1.303	1.077	1.313	0.999	1.039	1.21	1.082	1.082	1.215	0.935	1.149	1.126	1.042	1.059	1.37	1.175	1.034
1927	1.341	1.26	1.241	1.272	0.973	1.416	1.315	1.527	1.298	1.196	1.371	1.107	1.08	1.333	1.274	1.116	1.33	1.22	1.208	1.227	1.146	1.146	1.424	1.241	1.269
1928	1.177	1.236	1.044	1.068	0.955	1.248	1.352	1.451	1.111	1.192	1.209	0.994	1.11	1.125	1.078	1.052	0.847	1.127	1.107	1.119	1.16	0.97	1.325	1.141	1.143
1929	1.168	1.213	1.091	1.073	1.056	1.258	1.208	1.456	1.066	1.306	1.405	1.206	1.166	1.094	1.157	1.105	1.074	1.214	1.044	1.149	1.312	1.002	1.266	1.211	1.236
1930	1.096	1.074	1.196	0.969	1.016	1.208	1.182	1.422	1.085	1.387	1.258	0.927	1.122	1.034	1.065	1.045	1.137	1.224	0.982	1.031	1.048	1.08	1.172	1.134	1.16
1931	1.034	1.057	1.049	0.927	0.921	1.142	1.142	1.376	0.909	1.138	1.184	0.865	1.014	1.078	1.011	1.024	1.139	1.003	0.913	1.011	0.873	1.028	1.182	1.128	1.126
1932	1.263	1.131	1.118	1.088	0.997	1.283	1.316	1.526	1.048	1.268	1.276	1.038	1.228	1.18	1.24	1.072	1.027	1.313	1.034	1.221	0.982	1.118	1.229	1.218	1.258
1933	1.057	1.045	1.1	0.859	0.885	0.928	1.091	1.473	0.892	1.074	1.074	0.768	1.015	0.825	0.871	0.914	0.849	1.069	0.82	0.934	0.762	0.948	0.907	1.07	1.083
1934	1.359	1.143	1.077	0.89	0.904	1.149	0.807	1.391	1	0.953	1.06	0.919	1.025	0.845	1.05	0.9	0.887	1.166	0.994	1.057	0.753	1.016	1.09	1.05	1.143
1935	1.192	1.158	1.09	1.025	1.02	1.137	1.064	1.456	0.856	1.097	1.053	1.071	0.933	1.084	1.167	1.068	0.891	1.05	0.937	1.058	0.853	0.961	1.225	1.181	1.053
1936	1.125	1.17	1.114	0.938	1.11	1.079	1.079	1.456	0.871	0.917	0.881	1.021	1.045	1.016	1.071	1.097	0.994	1.143	0.943	1.103	0.717	0.855	1.108	1.129	1.122
1937	1.213	1.076	1.148	0.972	1.073	1.097	0.994	1.48	0.887	1.138	0.815	0.952	0.994	1.006	1.01	1.088	1.018	0.991	0.96	1.114	0.868	0.93	0.99	1.097	1.073
1938	1.246	1.051	0.883	0.808	1.152	1.192	0.805	1.422	0.843	1.052	1.021	0.954	1.158	1.09	1.07	1.112	1.045	1.027	1.072	1.179	0.853	0.961	1.117	1.138	1.16
1939	0.991	0.797	0.948	0.787	1.261	1.025	0.989	1.415	0.785	1.085	1.018	0.859	1.028	0.902	0.947	1.107	1.045	1.047	0.863	0.95	0.832	1.103	0.996	1.136	0.968
1940	0.812	0.573	0.958	0.78	1.05	0.746	0.858	1.085	0.622	0.688	0.779	0.627	0.445	0.607	0.764	0.855	0.711	0.549	0.575	0.842	0.629	0.793	0.684	0.796	0.672
1941	0.943	0.733	1.002	1.014	1.18	0.82	0.737	1.073	0.944	0.827	0.637	1.077	0.871	0.764	0.821	1.023	0.911	0.806	0.777	0.943	0.804	0.908	0.995	0.756	0.968
1942	0.793	0.927	1.155	1.106	1.219	0.96	1.169	1.266	1.029	1.067	0.921	1.082	1.098	1.039	0.984	1.036	1.082	0.817	0.94	1.079	0.893	0.99	1.131	1.071	1.041
1943	1.082	0.795	1.223	1.184	1.169	0.679	0.814	1.209	1.122	0.925	0.825	0.969	0.858	1.044	0.796	0.869	1.095	0.73	0.818	0.953	0.869	1.158	0.934	1.044	0.892
1944	1.13	1.071	1.334	1.203	1.208	1.043	1.09	1.206	1.315	0.957	0.96	0.759	1.018	1.042	0.868	0.942	1.439	0.817	0.915	0.823	1.109	1.105	0.895	1.031	0.914
1945	1.188	1.13	1.423	1.324	1.227	1.237	1.124	1.34	1.443	1.148	1.308	1.144	1.239	1.339	1.112	1.046	1.461	1.092	1.054	1.181	1.236	1.356	1.047	1.244	1.186
1946	1.285	1.185	1.391	1.248	1.196	1.285	1.302	1.439	0.962	1.237	1.422	1.15	1.281	1.309	1.176	1.142	1.244	1.217	1.152	1.169	1.303	1.146	1.185	1.397	1.255
1947	1.143	1.207	0.913	0.974	1.267	0.906	0.732	1.115	0.851	0.969	1.061	1.071	1.151	0.927	0.898	1.061	0.689	1.156	0.937	1.088	1.307	0.737	1.036	1.059	1.072
1948	1.126	1.148	1.076	0.941	1.171	1.234	1.106	1.306	1.102	1.089	1.223	0.955	1.123	0.914	1.066	1.063	0.961	0.942	0.957	0.975	1.066	0.723	0.921	1.182	1.187
1949	1.184	1.23	1.362	1.072	1.188	0.886	1.027	1.159	1.065	0.911	1.111	0.924	1.116	0.952	1.029	1.005	1.073	1.083	0.988	0.906	1.032	0.865	1.116	1.15	1.065
1950	1.283	1.039	1.049	1.139	1.147	1.189	1.096	1.231	1.185	0.916	1.316	1.069	0.82	0.924	0.971	1.054	0.978	0.928	0.947	0.89	1.047	0.924	1.058	1.142	0.874
1951	1.137	1.148	1.146	1.325	1.161	0.887	1.042	1.218	1.123	0.958	1.129	0.838	0.701	0.95	1.06	1.149	0.695	0.905	1.036	1.015	1.096	1.065	1.112	1.084	1.029
1952	1.211	0.996	1.113	1.323	1.165	1.148	1.169	1.204	1.169	0.987	1.213	0.855	0.874	1.073	1.225	1.153	1.118	0.969	1.071	1.031	1.257	1.154	1.138	1.057	1.169
1953	1.29	1.257	1.357	1.507	1.324	1.388	1.268	1.387	1.252	1.214	1.491	1.02	1.056	1.329	1.468	1.235	1.158	1.108	1.219	1.295	1.344	1.348	1.32	1.33	1.286
1954	1.296	0.958	1.332	1.397	1.276	1.137	1.109	1.17	1.123	1.006	1.199	0.994	1.036	1.126	1.205	1.224	1.122	1.124	1.065	1.152	1.443	1.046	1.193	1.096	1.258
1955	1.039	1.063	1.138	1.143	1.228	0.902	0.826	0.933	0.864	0.883	0.981	1.068	0.781	0.871	0.992	1.143	0.995	0.947	0.901	1.033	1.065	0.83	0.961	0.834	1.051
1956	0.931	0.984	1.31	1.29	1.228	0.89	0.924	1.101	1.167	1.115	0.915	1.117	0.915	0.91	0.975	1.142	1.034	0.878	1.03	1.073	1.209	0.945	1.095	1.043	1.133
1957	1.327	1.125	1.396	1.586	1.33	1.177	1.185	1.271	1.428	1.171	1.339	1.42	1.286	1.239	1.229	1.289	1.164	1.298	1.293	1.308	1.449	1.318	1.311	1.258	1.278
1958	1.25	1.227	1.373	1.393	1.253	1.216	1.332	1.191	1.152	1.109	1.158	1.291	1.236	1.18	1.273	1.222	1.058	1.144	1.184	1.214	1.329	1.063	1.209	1.166	1.235
1959	0.954	0.749	1.048	1.118	1.099	1.116	0.682	0.871	0.945	1.024	0.837	1.001	0.665	0.953	1.061	1.156	0.852	0.874	0.946	1.01	0.988	0.693	1.013	0.796	0.797
1960	0.99	0.943	1.08	0.933	0.922	0.805	0.989	1.01	1.107	0.981	0.777	0.997	0.902	0.913	0.973	1.039	0.848	0.887	0.776	1.028	0.908	0.894	0.976	0.987	1.032
1961	0.878	1.024	1.074	0.94	0.781	1.268	1.092	0.999	1.018	0.915	0.825	1.16	1.167	1.123	1.086	0.959	0.963	1.253	0.942	1.123	0.981	1.083	1.047	0.989	1.1
1962	0.94	1.036	1.22	1.006	0.904	1.226	1.101	0.954	1.157	1.016	0.778	1.146	0.977	1.128	1.072	0.984	1.064	1.076	0.99	1.113	1.21	1.204	0.969	0.985	1.125
1963	0.847	0.954	1.227	1.13	0.985	1.419	1.102	1.041	1.046	0.816	0.909	1.302	1.194	1.035	1.222	1.014	1.156	1.122	1.174	1.231	1.077	1.25	1.016	1.091	1.123
1964	0.856	0.849	1.366	1.408	1.035	1.218	0.943	1.069	1.278	1.011	0.988	1.473	1.097	1.206	1.289	1.155	1.376	0.996	1.306	1.345	1.256	1.226	1.215	1.039	1.214
1965	0.937	0.929	1.312	1.317	1.039	1.09	1.082	1.157	1.117	1.041	1.107	1.316	1.088	1.157	1.099	1.108	1.162	1.147	1.087	1.16	1.207	1.125	1.153	1.177	1.115
1966	0.938	0.906	1.229	1.012	0.926	1.021	1.029	0.933	0.92	1.011	0.949	1.052	1.035	0.938	0.973	0.999	1.073	0.7	0.89	0.92	1.026	1.003	0.938	0.985	0.913
1967	1.13	1.017	1.267	1.205	1.005	1.155	1.07	1.042	1.178	1.108	1.057	1.385	1.012	1.268	1.231	1.072	1.324	1.052	1.132	1.088	1.209	1.235	1.132	1.112	1.108
1968	1.029	1.03	1.249	1.17	1.019	1.11	1.009	1.045	1.015	1.037	1.1	1.256	0.956	1.024	0.98	1.026	1.141	0.98	0.756	0.825	0.969	1.16	1.055	1.012	0.985
1969	0.865	0.813	1.159	0.791	0.928	0.769	0.897	0.878	0.982	1.037	0.804	0.917	0.733	0.824	0.747	0.929	1.027	0.728	0.59	0.798	0.722	0.901	0.732	0.809	0.691
1970	0.937	0.799	0.971	0.785	0.945	0.81	0.961	0.879	0.649	0.976	0.768	0.909	0.766	0.965	0.788	0.94	0.861	0.75	0.788	0.935	0.873	0.852	0.964	0.906	0.824
1971	0.965	0.836	1.133	0.878	0.974	0.758	1.121	0.981	0.95	1.044	0.824	0.908	0.909	0.976	0.711	0.963	1.028	0.814	0.915	0.887	0.99	0.996	0.964	0.979	0.763
1972	0.963	0.951	1.273	1.045	1.132	0.997	1.206	1.056	1.115	1.106	0.946	1.09	1.07	1.077	0.995	1.181	1.136	0.977	1.121	1.027	1.176	1.151	1.064	1.083	1.041
1973	0.884	0.977	1.171	1.115	1.148	1.193	1.276	1.003	1.056	1.127	0.977	1.152	1.049	0.917	0.993	1.092	0.925	0.821	1.116	0.97	1.03	1.147	1.016	1.124	1.058
1974	1.064	0.834	1.154	0.974	1.18	0.747	1.03	1.079	0.626	1.036	0.742	0.969	1.05	0.752	0.887	1.002	0.58	0.856	0.831	0.787	1.141	0.808	1.014	0.986	1.082
1975	0.999	0.729	1.058	0.909	1.33	0.834	1.186	0.992	0.943	1.016	0.86	1.117	1.082	0.89	0.823	1.085	0.796	0.87	1.005	0.952	1.103	0.868	0.969	0.99	0.988
1976	1.163	0.888	1.077	0.909	1.065	0.938	1.296	1.043	0.866	1.005	0.914	0.942	0.903	0.82	0.898	1.088	0.843	0.801	0.833	0.829	0.987	1.079	0.984	1.065	1.128
1977	1.058	0.981	0.975	0.898	1.08	0.902	1.011	1.022	0.998	1.051	0.872	1.055	0.893	0.899	1.019	1.083	0.961	0.948	1.031	1.032	1.006	1.023	1.057	1.027	1.215
1978	1.058	0.823	1.072	1.017	1.057	0.919	0.944	0.922	1.091	0.905	0.914	1.103	1.083	0.916	0.952	1.093	0.733	0.955	0.998	0.999	0.965	1.015	1.049	1.054	1.063
1979	1.167	0.836	1.163	1.071	1.137	1.112	1.15	0.98	1.071	1.011	0.934	1.14	1.182	1.1	1.141	1.174	1.048	0.883	1.126	1.13	1.086	1.326	1.148	1.1	1.289
1980	1.075	1.083	1.269	1.144	1.201	1.235	1.078	1.111	1.112	1.178	1.158	1.237	1.225	1.165	1.277	1.134	1.08	1.219	1.205	1.319	1.155	1.263	1.207	1.222	1.323
1981	1.147	0.881	1.259	1.392	1.128	1.351	1.303	1.169	1.279	1.161	1.166	1.281	1.3	1.32	1.359	1.016	1.356	1.066	1.232	1.314	1.074	1.401	1.288	1.212	1.302
1982	1.219	0.872	1.046	1.196	1.016	1.19	1.127	1.089	0.986	1.067	1.122	1.055	1.116	0.983	1.12	1.055	1.197	0.947	1.124	1.146	1.133	1.026	1.194	1.093	0.96
1983	1.179	0.772	1.089	1.346	1.134	1.228	1.213	1.101	1.226	1.152	1.188	1.174	1.072	1.133	1.196	1.212	1.201	1.008	1.173	1.239	1.214	1.277	1.252	1.153	1.291
1984	0.974	0.979	1.031	1.4	1.156	1.478	1.358	1.221	1.233	1.128	1.213	1.206	1.129	1.277	1.249	1.135	0.996	0.908	1.14	1.16	1.264	1.254	1.205	1.332	1.231
1985	1.079	0.899	1.025	1.281	1.187	1.266	1.185	1.095	1.15	1.116	1.086	1.143	1.033	1.136	1.024	1.195	1.137	0.855	1.103	1.21	1.147	1.201	1.251	1.119	1.003
1986	1.048	0.873	1.026	1.248	1.177	1.254	1.19	0.946	1.056	1.149	0.986	1.059	1.006	0.967	1.092	1.136	0.934	0.903	1.031	1.123	1.154	1.027	1.148	1.036	1.196
1987	1.18	1.105	1.09	1.449	1.219	1.341	1.481	1.211	1.222	1.271	1.212	1.124	1.131	1.184	1.181	1.128	1.132	1.01	1.2	1.153	1.321	1.229	1.344	1.217	1.239
1988	1.209	1.221	1.117	1.214	1.217	1.339	1.221	1.155	0.983	1.05	1.098	0.994	1.228	1.021	1.129	1.035	1.091	1.104	1.069	1.341	1.078	1	1.289	1.052	1.264
1989	1.033	1.028	1.052	1.222	1.172	1.188	1.015	0.967	1.085	1.154	1.034	1.094	1.135	1.015	1.148	0.996	1.144	1.07	1.029	1.118	1.114	1.109	1.182	0.921	1.131
1990	1.126	1.029	0.976	1.151	1.055	1.172	1.135	1.162	0.921	0.939	1.188	1.019	1.067	1.032	1.109	0.941	1.22	1.33	0.928	0.985	1.304	1.173	1.072	1.198	1.117
1991	1.084	1.219	1.099	1.232	1.243	1.49	1.446	1.226	0.82	1.036	1.386	1.296	1.318	1.299	1.431	1.102	1.126	1.408	1.177	1.275	1.366	0.916	1.256	1.327	1.284
1992	0.718	0.855	0.921	1.064	1.157	1.087	0.979	0.944	0.806	1.057	1	1.169	1.02	0.979	1.141	1.139	0.93	1.206	1	1.131	0.954	0.964	1.011	0.831	0.971
1993	0.948	0.799	0.889	1.126	1.15	1.053	0.899	0.984	0.861	0.966	0.99	1.114	1.017	0.965	1.153	1.24	0.939	1.258	1.169	1.283	1.085	0.907	1.188	0.923	1.039
1994	0.828	0.943	0.94	1.17	1.177	1.062	1.182	1.027	0.825	0.89	0.95	1.019	1.069	0.972	1.214	1.142	0.964	1.201	1.041	1.151	1.051	0.874	1.061	1.083	1.056
1995	0.761	1.066	0.98	1.088	1.186	1.13	1.324	1.066	1.124	1.158	1.113	1.147	1.065	1.23	1.312	1.155	1.178	1.253	1.196	1.319	0.963	1.027	1.093	1.144	1.217
1996	0.804	1.077	0.943	1.174	1.08	1.15	1.287	1.044	1.045	1.096	1.109	1.266	NaN	1.165	1.176	1.136	1.145	1.091	1.166	1.175	1.085	1.085	1.188	1.116	1.067
1997	0.887	0.938	0.991	1.136	1.093	1.148	1.39	1.135	1.045	1.071	1.064	1.452	NaN	1.186	1.295	1.177	1.233	0.999	1.199	1.333	0.908	1.086	1.161	1.185	1.236
1998	0.753	0.97	0.939	1.127	0.857	1.084	1.317	1.078	1.21	1.119	1.051	1.23	NaN	1.124	1.124	1.134	1.073	1.119	1.047	1.171	1.015	1.172	1.081	1.178	1.208
1999	0.966	1.029	0.984	1.188	1.018	1.079	1.303	1.099	1.203	1.188	1.209	1.234	NaN	1.142	1.098	1.224	1.247	1.024	1.091	1.243	1.119	1.117	1.156	1.107	1.03
2000	1.176	0.826	1.032	1.224	1.115	0.941	1.143	1.112	1.117	1.328	1.159	1.238	NaN	1.119	1.152	1.246	1.299	1.031	1.108	1.215	1.523	0.973	1.197	1.06	1.188
2001	0.946	0.831	1.197	1.019	1.089	0.903	1.147	1.07	1.137	1.13	1.058	1.01	NaN	1.007	0.986	1.102	1.131	1.117	0.941	0.979	1.409	0.996	0.966	1.01	1.075
2002	0.846	0.963	1.185	1.095	1.134	1.138	1.287	1.172	1.136	1.11	1.116	0.991	NaN	1.272	0.953	1.201	1.159	1.071	1.033	1.055	1.158	1.25	0.975	0.981	1.092
2003	NaN	0.732	1.253	NaN	1.212	1.18	1.149	1.173	1.171	1.245	1.236	1.188	NaN	1.185	1.077	1.274	NaN	0.885	NaN	1.23	1.206	1.246	1.214	1.102	1.224
2004	NaN	0.737	1.123	NaN	1.213	1.083	1.301	1.223	0.958	1.09	1.331	1.251	NaN	0.958	1.142	1.29	NaN	NaN	NaN	1.11	1.128	1.017	1.21	1.174	1.275
2005	NaN	0.908	1.264	NaN	1.276	1.103	1.213	1.205	1.188	1.195	1.25	1.286	NaN	1.17	1.216	1.303	NaN	NaN	NaN	1.149	1.134	1.185	1.202	1.08	1.32
2006	NaN	0.783	1.068	NaN	1.365	1.111	1.172	1.137	1.164	1.165	1.084	1.287	NaN	1.042	1.159	1.238	NaN	NaN	NaN	1.2	1.071	1.047	1.178	1.01	1.182
2007	NaN	0.798	1.117	NaN	1.343	1.258	1.144	1.12	1.113	1.282	1.202	1.294	NaN	1.274	1.192	1.244	NaN	NaN	NaN	1.18	1.088	1.047	1.3	1.069	1.18
2008	NaN	0.773	1.058	NaN	1.292	1.057	0.947	1.038	0.965	1.038	0.966	1.203	NaN	0.899	1.13	1.182	NaN	NaN	NaN	1.049	0.679	0.946	1.135	0.928	1.051
2009	NaN	1.146	1.068	NaN	1.33	NaN	1.262	1.05	1.233	1.065	1.138	1.175	NaN	1.129	NaN	1.235	NaN	NaN	NaN	0.985	0.791	1.06	1.224	1.138	1.257
2010	NaN	1.267	1.127	NaN	1.365	NaN	1.278	1.031	NaN	1.173	1.047	1.187	NaN	1.159	NaN	1.2	NaN	NaN	NaN	1.037	1.001	NaN	1.093	1.083	0.988
2011	NaN	1.067	1.111	NaN	1.347	NaN	1.065	1.088	NaN	1.212	1.126	1.032	NaN	1.191	NaN	1.25	NaN	NaN	NaN	1.11	1.283	NaN	1.212	1.056	NaN
