# Supplementary material for: Hydroclimate variability in Scandinavia over the last millennium – insights from a climate model–proxy data comparison
Source: Copernicus journal article supplement (doi:10.5194/cp-13-1831-2017), 2017-12-18
Supplement: Supplementary file 3 [file ScandH17reconstruction.xlsx]

## Sheet: Blad1
Year	ScandH17	-1RMSE	+1RMSE
1000	-0.0352783	-0.941496	0.870939
1001	-0.237526	-1.14374	0.668691
1002	0.369481	-0.536736	1.2757
1003	-0.413074	-1.31929	0.493143
1004	-0.514251	-1.42047	0.391966
1005	-0.460308	-1.36652	0.44591
1006	-0.837927	-1.74414	0.0682902
1007	0.0998463	-0.806371	1.00606
1008	0.274889	-0.631328	1.18111
1009	-0.150128	-1.05635	0.756089
1010	0.173772	-0.732446	1.07999
1011	-0.885111	-1.79133	0.0211063
1012	0.194052	-0.712165	1.10027
1013	0.349217	-0.557	1.25543
1014	0.686355	-0.219863	1.59257
1015	-0.116404	-1.02262	0.789814
1016	0.470435	-0.435782	1.37665
1017	1.03718	0.130965	1.9434
1018	0.247933	-0.658284	1.15415
1019	0.4505	-0.455717	1.35672
1020	0.268357	-0.63786	1.17457
1021	0.800936	-0.105281	1.70715
1022	1.07084	0.164627	1.97706
1023	-0.156665	-1.06288	0.749552
1024	0.241281	-0.664936	1.1475
1025	-0.331995	-1.23821	0.574223
1026	0.477362	-0.428855	1.38358
1027	0.234359	-0.671858	1.14058
1028	0.416723	-0.489495	1.32294
1029	-0.176929	-1.08315	0.729288
1030	0.0188322	-0.887385	0.925049
1031	-0.210658	-1.11688	0.695559
1032	-1.57962	-2.48583	-0.673398
1033	-0.453546	-1.35976	0.452671
1034	-0.561257	-1.46747	0.34496
1035	-0.419768	-1.32598	0.486449
1036	-0.608441	-1.51466	0.297776
1037	-0.763778	-1.67	0.142439
1038	-0.864898	-1.77112	0.0413189
1039	-0.0759301	-0.982147	0.830287
1040	-0.345613	-1.25183	0.560604
1041	0.342239	-0.563978	1.24846
1042	0.828014	-0.0782035	1.73423
1043	0.598648	-0.307569	1.50487
1044	0.43013	-0.476087	1.33635
1045	0.96313	0.0569123	1.86935
1046	0.342239	-0.563978	1.24846
1047	0.382771	-0.523446	1.28899
1048	-0.305078	-1.21129	0.60114
1049	-1.30338	-2.2096	-0.397163
1050	-2.82795	-3.73417	-1.92173
1051	-2.4568	-3.36302	-1.55058
1052	-1.6743	-2.58052	-0.768086
1053	-1.41137	-2.31759	-0.505155
1054	-1.35062	-2.25684	-0.444403
1055	-1.128	-2.03422	-0.221785
1056	-0.446685	-1.3529	0.459532
1057	-0.628879	-1.5351	0.277338
1058	0.133345	-0.772873	1.03956
1059	0.342239	-0.563978	1.24846
1060	0.585405	-0.320812	1.49162
1061	1.16522	0.259005	2.07144
1062	1.44886	0.542646	2.35508
1063	1.65071	0.744496	2.55693
1064	0.996593	0.0903757	1.90281
1065	0.241281	-0.664936	1.1475
1066	0.706677	-0.199541	1.61289
1067	0.328888	-0.577329	1.23511
1068	0.713273	-0.192944	1.61949
1069	0.693059	-0.213159	1.59928
1070	0.0524449	-0.853772	0.958662
1071	0.26139	-0.644827	1.16761
1072	0.598648	-0.307569	1.50487
1073	-0.37253	-1.27875	0.533687
1074	-0.716482	-1.6227	0.189735
1075	-0.331995	-1.23821	0.574223
1076	-0.2579	-1.16412	0.648317
1077	-0.878577	-1.78479	0.0276404
1078	-0.399513	-1.30573	0.506705
1079	-0.655795	-1.56201	0.250422
1080	-0.3254	-1.23162	0.580817
1081	1.24623	0.340016	2.15245
1082	1.56986	0.663647	2.47608
1083	1.50235	0.596135	2.40857
1084	0.841475	-0.0647418	1.74769
1085	0.848337	-0.0578797	1.75455
1086	1.02383	0.117616	1.93005
1087	1.1789	0.272683	2.08512
1088	0.672898	-0.233319	1.57912
1089	0.774142	-0.132075	1.68036
1090	1.72492	0.818704	2.63114
1091	1.82626	0.920044	2.73248
1092	0.504273	-0.401944	1.41049
1093	0.470435	-0.435782	1.37665
1094	1.4822	0.575985	2.38842
1095	1.15862	0.252406	2.06484
1096	-0.439923	-1.34614	0.466294
1097	-0.831225	-1.73744	0.074992
1098	-2.03188	-2.9381	-1.12567
1099	-2.60522	-3.51144	-1.699
1100	-2.01832	-2.92453	-1.1121
1101	-2.09247	-2.99869	-1.18625
1102	-1.72154	-2.62776	-0.815327
1103	-1.14827	-2.05448	-0.242049
1104	-0.392961	-1.29918	0.513256
1105	0.26139	-0.644827	1.16761
1106	-0.0826272	-0.988844	0.82359
1107	-1.65404	-2.56025	-0.747819
1108	-1.82948	-2.73569	-0.92326
1109	-1.84294	-2.74915	-0.936719
1110	-1.86996	-2.77617	-0.96374
1111	-1.17529	-2.08151	-0.269071
1112	-1.44499	-2.3512	-0.53877
1113	-0.885111	-1.79133	0.0211063
1114	-1.22923	-2.13545	-0.323017
1115	-1.95092	-2.85714	-1.04471
1116	-2.07918	-2.9854	-1.17297
1117	-2.04512	-2.95133	-1.1389
1118	-2.28126	-3.18748	-1.37505
1119	-2.07243	-2.97865	-1.16621
1120	-1.04715	-1.95337	-0.140933
1121	-1.29663	-2.20284	-0.39041
1122	-1.06747	-1.97369	-0.161258
1123	-0.655795	-1.56201	0.250422
1124	-0.156665	-1.06288	0.749552
1125	0.598648	-0.307569	1.50487
1126	0.956159	0.0499416	1.86238
1127	-0.359295	-1.26551	0.546922
1128	-1.16168	-2.06789	-0.255458
1129	-0.770422	-1.67664	0.135796
1130	-1.0133	-1.91952	-0.107087
1131	-1.16843	-2.07464	-0.26221
1132	-1.16168	-2.06789	-0.255458
1133	-1.39787	-2.30409	-0.491653
1134	-1.10104	-2.00726	-0.194821
1135	-1.30338	-2.2096	-0.397163
1136	-0.446685	-1.3529	0.459532
1137	0.43013	-0.476087	1.33635
1138	0.274889	-0.631328	1.18111
1139	-0.284924	-1.19114	0.621293
1140	0.36268	-0.543537	1.2689
1141	0.652795	-0.253422	1.55901
1142	0.376131	-0.530086	1.28235
1143	0.356082	-0.550136	1.2623
1144	0.0591979	-0.847019	0.965415
1145	-0.54132	-1.44754	0.364897
1146	0.207556	-0.698661	1.11377
1147	-0.446685	-1.3529	0.459532
1148	-0.0219353	-0.928152	0.884282
1149	1.29336	0.38714	2.19957
1150	1.15186	0.245645	2.05808
1151	0.679603	-0.226614	1.58582
1152	0.828014	-0.0782035	1.73423
1153	0.659325	-0.246892	1.56554
1154	-0.0419185	-0.948136	0.864299
1155	1.57667	0.670456	2.48289
1156	0.335641	-0.570576	1.24186
1157	0.720139	-0.186078	1.62636
1158	1.4081	0.501885	2.31432
1159	0.96313	0.0569123	1.86935
1160	1.38113	0.474912	2.28735
1161	1.27309	0.366873	2.17931
1162	0.740127	-0.166091	1.64634
1163	1.34774	0.441526	2.25396
1164	0.720139	-0.186078	1.62636
1165	1.41486	0.508646	2.32108
1166	-0.0826272	-0.988844	0.82359
1167	0.281601	-0.624616	1.18782
1168	-0.520994	-1.42721	0.385223
1169	-0.331995	-1.23821	0.574223
1170	0.241281	-0.664936	1.1475
1171	-0.878577	-1.78479	0.0276404
1172	-1.20897	-2.11518	-0.302748
1173	-1.47201	-2.37823	-0.565793
1174	-1.60015	-2.50637	-0.693933
1175	-1.3169	-2.22311	-0.410678
1176	-1.23582	-2.14204	-0.329606
1177	-1.128	-2.03422	-0.221785
1178	-1.76872	-2.67494	-0.862508
1179	-2.78054	-3.68676	-1.87432
1180	-2.02513	-2.93135	-1.11891
1181	-1.97789	-2.88411	-1.07168
1182	-1.57323	-2.47945	-0.667018
1183	-2.53771	-3.44393	-1.6315
1184	-2.11938	-3.0256	-1.21316
1185	-2.26791	-3.17413	-1.36169
1186	-1.55979	-2.466	-0.65357
1187	-0.966128	-1.87235	-0.0599108
1188	-1.93741	-2.84363	-1.03119
1189	-1.59335	-2.49957	-0.687133
1190	-1.4924	-2.39861	-0.586178
1191	-1.6743	-2.58052	-0.768086
1192	-0.0826272	-0.988844	0.82359
1193	-0.298325	-1.20454	0.607892
1194	-0.79075	-1.69697	0.115467
1195	-0.534343	-1.44056	0.371874
1196	-0.284924	-1.19114	0.621293
1197	-0.70303	-1.60925	0.203187
1198	-1.66075	-2.56697	-0.754534
1199	-0.446685	-1.3529	0.459532
1200	-0.359295	-1.26551	0.546922
1201	-0.352322	-1.25854	0.553895
1202	0.0726015	-0.833616	0.978819
1203	0.140103	-0.766114	1.04632
1204	0.416723	-0.489495	1.32294
1205	0.463623	-0.442594	1.36984
1206	0.227716	-0.678501	1.13393
1207	0.106437	-0.79978	1.01265
1208	-0.291622	-1.19784	0.614596
1209	-0.669249	-1.57547	0.236968
1210	-0.696215	-1.60243	0.210002
1211	-1.22248	-2.12869	-0.316259
1212	0.497681	-0.408536	1.4039
1213	0.214266	-0.691951	1.12048
1214	0.672898	-0.233319	1.57912
1215	1.09788	0.191658	2.00409
1216	0.328888	-0.577329	1.23511
1217	-0.278164	-1.18438	0.628054
1218	-0.0759301	-0.982147	0.830287
1219	0.335641	-0.570576	1.24186
1220	0.875302	-0.030915	1.78152
1221	1.76563	0.85941	2.67184
1222	0.794402	-0.111815	1.70062
1223	0.693059	-0.213159	1.59928
1224	-0.0285236	-0.934741	0.877694
1225	-0.797566	-1.70378	0.108651
1226	-0.547965	-1.45418	0.358252
1227	0.490762	-0.415455	1.39698
1228	0.8819	-0.0243168	1.78812
1229	0.166965	-0.739252	1.07318
1230	-0.514251	-1.42047	0.391966
1231	-0.642446	-1.54866	0.263772
1232	-0.993101	-1.89932	-0.0868838
1233	-1.20897	-2.11518	-0.302748
1234	-1.1079	-2.01411	-0.20168
1235	0.402922	-0.497495	1.30334
1236	-0.903214	-1.80363	-0.00279694
1237	0.052009	-0.848408	0.952426
1238	0.15087	-0.749547	1.05129
1239	1.76986	0.869443	2.67028
1240	1.8441	0.943678	2.74451
1241	1.68378	0.78336	2.58419
1242	2.33646	1.43604	3.23688
1243	2.05993	1.15951	2.96034
1244	1.64474	0.744322	2.54516
1245	1.65409	0.753676	2.55451
1246	1.04518	0.144766	1.9456
1247	1.73823	0.837815	2.63865
1248	1.45893	0.558512	2.35935
1249	0.889217	-0.0112002	1.78963
1250	0.942351	0.0419342	1.84277
1251	1.31422	0.413805	2.21464
1252	0.825772	-0.074645	1.72619
1253	1.21414	0.313722	2.11456
1254	0.542674	-0.357743	1.44309
1255	1.69211	0.791688	2.59252
1256	1.33187	0.431456	2.23229
1257	0.7775	-0.122918	1.67792
1258	1.00874	0.108321	1.90916
1259	1.35732	0.456903	2.25774
1260	0.596919	-0.303499	1.49734
1261	-0.216372	-1.11679	0.684046
1262	0.199287	-0.70113	1.0997
1263	-0.359381	-1.2598	0.541036
1264	-0.800527	-1.70094	0.0998898
1265	0.389867	-0.510551	1.29028
1266	1.56003	0.659611	2.46045
1267	1.6116	0.711184	2.51202
1268	1.20135	0.300936	2.10177
1269	2.0429	1.14248	2.94332
1270	0.471504	-0.428913	1.37192
1271	0.967981	0.067564	1.8684
1272	0.304864	-0.595554	1.20528
1273	0.411708	-0.488709	1.31213
1274	0.0825039	-0.817913	0.982921
1275	0.647592	-0.252825	1.54801
1276	0.147416	-0.753002	1.04783
1277	-0.603768	-1.50418	0.29665
1278	-0.220535	-1.12095	0.679882
1279	-0.971567	-1.87198	-0.0711502
1280	-0.780359	-1.68078	0.120058
1281	-0.386806	-1.28722	0.513611
1282	-0.829005	-1.72942	0.0714123
1283	-0.531421	-1.43184	0.368996
1284	0.330893	-0.569524	1.23131
1285	-1.37094	-2.27136	-0.470526
1286	-1.45303	-2.35345	-0.552612
1287	-0.966252	-1.86667	-0.0658351
1288	-1.69437	-2.59479	-0.793955
1289	-0.923062	-1.82348	-0.0226446
1290	-0.869615	-1.77003	0.0308021
1291	-0.400327	-1.30074	0.50009
1292	-1.0156	-1.91601	-0.115178
1293	-0.595564	-1.49598	0.304853
1294	-1.27198	-2.1724	-0.371567
1295	-1.27979	-2.18021	-0.379372
1296	-0.770898	-1.67132	0.129519
1297	-1.13148	-2.0319	-0.231064
1298	-1.34374	-2.24415	-0.443319
1299	-0.566817	-1.46723	0.3336
1300	-0.151286	-1.0517	0.749131
1301	0.0998163	-0.800601	1.00023
1302	-0.169636	-1.07005	0.730782
1303	0.972073	0.0716556	1.87249
1304	-0.211122	-1.11154	0.689295
1305	-0.81791	-1.71833	0.0825074
1306	-0.047109	-0.947526	0.853308
1307	-0.472763	-1.37318	0.427654
1308	-0.454989	-1.35541	0.445428
1309	-0.281393	-1.18181	0.619024
1310	-0.540082	-1.4405	0.360335
1311	-0.566558	-1.46697	0.33386
1312	0.00823559	-0.892182	0.908653
1313	0.313265	-0.587152	1.21368
1314	-0.114866	-1.01528	0.785552
1315	-0.574568	-1.47499	0.325849
1316	-0.360397	-1.26081	0.54002
1317	0.381483	-0.518934	1.2819
1318	-0.0366577	-0.937075	0.86376
1319	0.443779	-0.456639	1.3442
1320	-0.0957406	-0.996158	0.804677
1321	-0.192044	-1.09246	0.708374
1322	-0.440253	-1.34067	0.460164
1323	0.781683	-0.118734	1.6821
1324	0.529738	-0.370679	1.43016
1325	0.557228	-0.343189	1.45765
1326	-0.0758624	-0.97628	0.824555
1327	-0.192518	-1.09294	0.707899
1328	-2.55411	-3.45453	-1.65369
1329	-0.933014	-1.83343	-0.0325969
1330	-0.406891	-1.30731	0.493526
1331	-0.619701	-1.52012	0.280716
1332	-0.632279	-1.5327	0.268138
1333	-0.73664	-1.63706	0.163777
1334	0.209742	-0.690675	1.11016
1335	0.576021	-0.324396	1.47644
1336	0.0625198	-0.837897	0.962937
1337	0.953525	0.0531082	1.85394
1338	-0.0894209	-0.989838	0.810996
1339	0.380805	-0.519612	1.28122
1340	-0.869233	-1.76965	0.0311842
1341	0.390861	-0.509557	1.29128
1342	-0.30852	-1.20894	0.591897
1343	-0.00819187	-0.908609	0.892225
1344	0.185169	-0.715248	1.08559
1345	0.595889	-0.304528	1.49631
1346	-0.434979	-1.3354	0.465438
1347	-0.75026	-1.65068	0.150157
1348	-1.61738	-2.5178	-0.716967
1349	-1.33998	-2.2404	-0.439562
1350	-1.26353	-2.16394	-0.363109
1351	-0.894909	-1.79533	0.00550842
1352	-0.521304	-1.42172	0.379113
1353	-0.893746	-1.79416	0.00667153
1354	-0.151006	-1.05142	0.749411
1355	-0.0306909	-0.931108	0.869726
1356	0.341946	-0.558471	1.24236
1357	-0.309444	-1.20986	0.590973
1358	-0.370875	-1.27129	0.529542
1359	-0.0350761	-0.935493	0.865341
1360	-1.05705	-1.95747	-0.156634
1361	-0.207728	-1.10815	0.692689
1362	0.376929	-0.523488	1.27735
1363	0.372011	-0.528406	1.27243
1364	0.0664285	-0.833989	0.966846
1365	-0.15904	-1.05946	0.741377
1366	0.212158	-0.688259	1.11258
1367	0.174027	-0.72639	1.07444
1368	0.379642	-0.520775	1.28006
1369	-0.775576	-1.67599	0.124842
1370	-0.474614	-1.37503	0.425804
1371	0.0109137	-0.889504	0.911331
1372	-0.469396	-1.36981	0.431021
1373	-0.138113	-1.03853	0.762305
1374	0.771643	-0.128774	1.67206
1375	0.224344	-0.676074	1.12476
1376	0.799204	-0.101213	1.69962
1377	0.149891	-0.750526	1.05031
1378	0.744312	-0.156105	1.64473
1379	0.00460223	-0.895815	0.905019
1380	0.361066	-0.539351	1.26148
1381	0.505428	-0.394989	1.40585
1382	1.255	0.354587	2.15542
1383	0.785438	-0.114979	1.68586
1384	1.21236	0.311941	2.11278
1385	0.385719	-0.514699	1.28614
1386	0.570857	-0.32956	1.47127
1387	0.271915	-0.628502	1.17233
1388	-0.648323	-1.54874	0.252094
1389	-0.782198	-1.68261	0.11822
1390	-0.301782	-1.2022	0.598636
1391	-1.67341	-2.57383	-0.772991
1392	-1.52457	-2.42499	-0.624157
1393	-0.494751	-1.39517	0.405666
1394	-0.7047	-1.60512	0.195717
1395	-0.333714	-1.23413	0.566704
1396	-0.171282	-1.0717	0.729135
1397	-0.360185	-1.2606	0.540232
1398	0.0662193	-0.834198	0.966637
1399	0.171426	-0.728991	1.07184
1400	0.308271	-0.592146	1.20869
1401	-0.196272	-1.09669	0.704146
1402	-0.301855	-1.20227	0.598562
1403	0.224332	-0.676086	1.12475
1404	0.148795	-0.751622	1.04921
1405	1.14541	0.244995	2.04583
1406	1.50223	0.601813	2.40265
1407	0.269495	-0.630922	1.16991
1408	-1.41688	-2.3173	-0.516465
1409	-0.857004	-1.75742	0.0434128
1410	-0.496616	-1.39703	0.403801
1411	-0.622249	-1.52267	0.278168
1412	-0.323733	-1.22415	0.576685
1413	0.716405	-0.184012	1.61682
1414	0.0617904	-0.838627	0.962208
1415	-0.151549	-1.05197	0.748868
1416	-0.69748	-1.5979	0.202937
1417	-0.0132576	-0.913675	0.88716
1418	-0.345549	-1.24597	0.554868
1419	-0.121413	-1.02183	0.779005
1420	-0.463649	-1.36407	0.436768
1421	0.302459	-0.597958	1.20288
1422	-0.642686	-1.5431	0.257731
1423	-0.474273	-1.37469	0.426144
1424	-0.514851	-1.41527	0.385566
1425	-1.30964	-2.21006	-0.409227
1426	-0.580851	-1.48127	0.319566
1427	-0.116401	-1.01682	0.784016
1428	0.0204203	-0.879997	0.920838
1429	-0.387584	-1.288	0.512833
1430	0.739795	-0.160622	1.64021
1431	1.24616	0.345747	2.14658
1432	0.657901	-0.242516	1.55832
1433	1.33836	0.437947	2.23878
1434	2.56889	1.66847	3.46931
1435	1.61366	0.713242	2.51408
1436	1.57692	0.676504	2.47734
1437	0.850848	-0.0495693	1.75127
1438	0.0815395	-0.818878	0.981957
1439	0.528678	-0.371739	1.4291
1440	0.494	-0.406417	1.39442
1441	0.288896	-0.611521	1.18931
1442	0.54256	-0.357857	1.44298
1443	0.272503	-0.627914	1.17292
1444	-0.279206	-1.17962	0.621211
1445	0.0994534	-0.800964	0.999871
1446	-0.156621	-1.05704	0.743796
1447	0.0568406	-0.843577	0.957258
1448	-0.104122	-1.00454	0.796295
1449	-0.0206097	-0.921027	0.879808
1450	-0.328428	-1.22884	0.57199
1451	0.777313	-0.123104	1.67773
1452	0.403211	-0.497206	1.30363
1453	0.168032	-0.732385	1.06845
1454	-0.133723	-1.03414	0.766694
1455	-0.598163	-1.49858	0.302254
1456	-0.53704	-1.43746	0.363378
1457	-0.869525	-1.76994	0.0308924
1458	-0.391339	-1.29176	0.509078
1459	-0.530761	-1.43118	0.369656
1460	-0.839666	-1.74008	0.0607513
1461	-0.563045	-1.46346	0.337372
1462	-0.195957	-1.09637	0.704461
1463	-0.744247	-1.64466	0.15617
1464	-0.7817	-1.68212	0.118717
1465	-0.975253	-1.87567	-0.0748362
1466	-1.36152	-2.26193	-0.461099
1467	-1.23813	-2.13855	-0.337715
1468	-1.0431	-1.94352	-0.142686
1469	-0.427253	-1.32767	0.473164
1470	-1.05079	-1.9512	-0.15037
1471	-1.01157	-1.91199	-0.111154
1472	-0.989321	-1.88974	-0.0889034
1473	-0.673958	-1.57437	0.22646
1474	-0.221353	-1.12177	0.679064
1475	-0.852369	-1.75279	0.048048
1476	-1.33215	-2.23257	-0.431737
1477	-2.15472	-3.05513	-1.2543
1478	-2.17363	-3.07342	-1.27384
1479	-2.04889	-2.94868	-1.1491
1480	-0.818439	-1.71823	0.0813517
1481	-0.158682	-1.05847	0.741109
1482	-0.186512	-1.0863	0.713278
1483	-0.98644	-1.88623	-0.0866496
1484	-0.488751	-1.38854	0.41104
1485	-0.696641	-1.59643	0.203149
1486	0.022964	-0.876827	0.922755
1487	0.239816	-0.659975	1.13961
1488	0.191218	-0.708573	1.09101
1489	0.556143	-0.343648	1.45593
1490	-0.402801	-1.30259	0.49699
1491	-0.285657	-1.18545	0.614134
1492	0.0238685	-0.875922	0.923659
1493	-0.836525	-1.73632	0.0632657
1494	-2.05843	-2.95822	-1.15864
1495	-1.03502	-1.93481	-0.135232
1496	-1.35272	-2.25251	-0.452931
1497	-0.0691155	-0.968906	0.830675
1498	0.231003	-0.668788	1.13079
1499	-0.386825	-1.28662	0.512966
1500	0.0257973	-0.873994	0.925588
1501	-0.222246	-1.12204	0.677545
1502	-0.211173	-1.11096	0.688618
1503	-0.0358786	-0.935669	0.863912
1504	-0.627172	-1.52696	0.272619
1505	0.312691	-0.5871	1.21248
1506	0.157438	-0.742353	1.05723
1507	0.874913	-0.024878	1.7747
1508	0.9069	0.00710938	1.80669
1509	0.877814	-0.021977	1.7776
1510	1.39716	0.497366	2.29695
1511	0.568166	-0.331625	1.46796
1512	0.805316	-0.0944753	1.70511
1513	0.203126	-0.696665	1.10292
1514	-0.907398	-1.80719	-0.00760707
1515	-0.732244	-1.63203	0.167547
1516	-0.717665	-1.61746	0.182126
1517	-0.270093	-1.16988	0.629698
1518	-0.398241	-1.29803	0.50155
1519	-0.113699	-1.01349	0.786091
1520	-0.234049	-1.13384	0.665742
1521	0.600043	-0.299747	1.49983
1522	0.0528023	-0.846989	0.952593
1523	-1.41729	-2.31708	-0.517495
1524	-0.087075	-0.986866	0.812716
1525	-0.0848363	-0.984627	0.814955
1526	0.570519	-0.329272	1.47031
1527	-0.166077	-1.06587	0.733714
1528	0.0603438	-0.839447	0.960135
1529	0.131167	-0.768624	1.03096
1530	-0.0303178	-0.930109	0.869473
1531	-1.18316	-2.08295	-0.283373
1532	-1.49425	-2.39404	-0.594459
1533	-1.59795	-2.49774	-0.698161
1534	0.0426141	-0.857177	0.942405
1535	-0.0152169	-0.915008	0.884574
1536	-0.0795689	-0.97936	0.820222
1537	0.790192	-0.109599	1.68998
1538	-0.249871	-1.14966	0.64992
1539	0.399929	-0.499862	1.29972
1540	-0.130585	-1.03038	0.769206
1541	0.854624	-0.0451672	1.75441
1542	0.776566	-0.123225	1.67636
1543	0.711134	-0.188657	1.61092
1544	0.813591	-0.0862003	1.71338
1545	0.101482	-0.798309	1.00127
1546	0.131549	-0.768242	1.03134
1547	0.34181	-0.557981	1.2416
1548	0.492151	-0.40764	1.39194
1549	-0.267769	-1.16756	0.632022
1550	-0.0758768	-0.975668	0.823914
1551	0.745561	-0.15423	1.64535
1552	0.721608	-0.178183	1.6214
1553	0.319916	-0.579875	1.21971
1554	-1.07204	-1.97184	-0.172254
1555	0.529106	-0.370684	1.4289
1556	0.214808	-0.684983	1.1146
1557	-0.545274	-1.44507	0.354516
1558	0.678117	-0.221674	1.57791
1559	0.376891	-0.5229	1.27668
1560	0.535647	-0.364143	1.43544
1561	0.443685	-0.456106	1.34348
1562	0.623567	-0.276224	1.52336
1563	0.534492	-0.365299	1.43428
1564	0.353742	-0.546049	1.25353
1565	-0.138289	-1.03808	0.761502
1566	0.304944	-0.594846	1.20474
1567	0.492651	-0.40714	1.39244
1568	0.477728	-0.422063	1.37752
1569	-0.229926	-1.12972	0.669865
1570	0.603253	-0.296538	1.50304
1571	0.345668	-0.554123	1.24546
1572	-0.605712	-1.5055	0.294079
1573	-0.412685	-1.31248	0.487106
1574	-0.0491657	-0.948957	0.850625
1575	0.0421088	-0.857682	0.9419
1576	0.733166	-0.166625	1.63296
1577	1.24028	0.340492	2.14007
1578	0.937429	0.0376381	1.83722
1579	0.291493	-0.608298	1.19128
1580	0.308056	-0.591735	1.20785
1581	0.75759	-0.1422	1.65738
1582	0.17285	-0.726941	1.07264
1583	0.528285	-0.371506	1.42808
1584	0.172988	-0.726803	1.07278
1585	1.1101	0.210312	2.00989
1586	0.120508	-0.779283	1.0203
1587	1.03666	0.136869	1.93645
1588	1.07173	0.171941	1.97152
1589	0.495937	-0.403854	1.39573
1590	0.253321	-0.646469	1.15311
1591	-0.430224	-1.33002	0.469566
1592	0.0715133	-0.828278	0.971304
1593	-0.246944	-1.14673	0.652847
1594	0.574751	-0.32504	1.47454
1595	0.730337	-0.169454	1.63013
1596	0.499121	-0.40067	1.39891
1597	-0.420304	-1.3201	0.479486
1598	0.992073	0.0922817	1.89186
1599	0.0718159	-0.827975	0.971607
1600	0.0179243	-0.881867	0.917715
1601	-0.989075	-1.88887	-0.0892846
1602	0.766696	-0.133095	1.66649
1603	-0.364245	-1.26404	0.535546
1604	0.504177	-0.395613	1.40397
1605	-0.311138	-1.21093	0.588653
1606	-0.701435	-1.60123	0.198356
1607	0.111799	-0.787992	1.01159
1608	-0.613979	-1.51377	0.285812
1609	0.0401782	-0.859613	0.939969
1610	-0.77075	-1.67054	0.129041
1611	0.98719	0.0873995	1.88698
1612	0.179846	-0.719945	1.07964
1613	0.0240236	-0.875767	0.923814
1614	0.210021	-0.68977	1.10981
1615	0.180695	-0.719096	1.08049
1616	0.284966	-0.614825	1.18476
1617	2.01946	1.11967	2.91925
1618	0.410074	-0.489717	1.30986
1619	-0.695821	-1.59561	0.20397
1620	0.484092	-0.415699	1.38388
1621	0.386187	-0.513604	1.28598
1622	0.0672145	-0.832576	0.967005
1623	1.00601	0.10622	1.9058
1624	-0.119643	-1.01943	0.780148
1625	0.166571	-0.73322	1.06636
1626	-0.844778	-1.74457	0.0550132
1627	-0.140841	-1.04063	0.75895
1628	-0.0653713	-0.965162	0.83442
1629	0.0598024	-0.839988	0.959593
1630	1.18893	0.289138	2.08872
1631	0.363941	-0.53585	1.26373
1632	0.82094	-0.0788509	1.72073
1633	0.656057	-0.243734	1.55585
1634	0.670767	-0.229024	1.57056
1635	0.533037	-0.366944	1.43302
1636	0.2519	-0.648081	1.15188
1637	0.144919	-0.755062	1.0449
1638	0.250416	-0.649565	1.1504
1639	0.439253	-0.457526	1.33603
1640	0.607547	-0.289232	1.50433
1641	1.2426	0.345818	2.13938
1642	0.563096	-0.333683	1.45988
1643	-1.04667	-1.94345	-0.149891
1644	-0.208563	-1.10534	0.688215
1645	1.40802	0.512611	2.30344
1646	0.951477	0.0560651	1.84689
1647	1.30309	0.407678	2.1985
1648	1.71364	0.818223	2.60905
1649	1.63826	0.742843	2.53367
1650	1.77715	0.881736	2.67256
1651	1.38156	0.486152	2.27698
1652	-0.73217	-1.62758	0.163242
1653	0.872503	-0.0229086	1.76792
1654	-0.583116	-1.47853	0.312296
1655	0.507859	-0.387553	1.40327
1656	0.948559	0.0531474	1.84397
1657	-1.22169	-2.1171	-0.326279
1658	-0.40366	-1.29907	0.491752
1659	-2.52284	-3.41825	-1.62742
1660	-0.525945	-1.42136	0.369467
1661	-1.04223	-1.93764	-0.146814
1662	0.0553356	-0.840076	0.950748
1663	0.221662	-0.67375	1.11707
1664	0.210397	-0.685015	1.10581
1665	-0.27881	-1.17422	0.616602
1666	-0.516798	-1.41221	0.378614
1667	-2.00767	-2.90308	-1.11225
1668	-1.06457	-1.95998	-0.169161
1669	-1.35096	-2.23414	-0.467768
1670	-1.61396	-2.49715	-0.73077
1671	-0.657958	-1.54115	0.22523
1672	-0.473327	-1.35651	0.409861
1673	0.63247	-0.250717	1.51566
1674	-0.866377	-1.74957	0.0168106
1675	-0.745719	-1.62891	0.137469
1676	-0.645868	-1.52906	0.23732
1677	-1.75368	-2.63687	-0.870495
1678	-0.602319	-1.48551	0.280869
1679	-2.27674	-3.15992	-1.39355
1680	-0.317376	-1.20056	0.565812
1681	-0.649162	-1.53235	0.234026
1682	-0.561536	-1.44472	0.321652
1683	1.38468	0.501492	2.26787
1684	0.742309	-0.140879	1.6255
1685	1.60056	0.717376	2.48375
1686	2.95317	2.06252	3.84383
1687	1.65267	0.762014	2.54332
1688	0.203936	-0.686718	1.09459
1689	0.106482	-0.784172	0.997136
1690	-1.45583	-2.34648	-0.565172
1691	-0.337016	-1.22709	0.553058
1692	-0.071942	-0.962015	0.818131
1693	-1.80096	-2.69104	-0.910892
1694	0.805139	-0.0850559	1.69533
1695	-0.345117	-1.23531	0.545078
1696	0.096104	-0.794091	0.986299
1697	-0.590764	-1.48096	0.29943
1698	-0.154703	-1.0449	0.735491
1699	-0.212829	-1.10302	0.677366
1700	-0.148842	-1.03904	0.741352
1701	-0.56717	-1.45736	0.323025
1702	-0.0286461	-0.918841	0.861549
1703	-0.50871	-1.3989	0.381485
1704	-1.13504	-2.02851	-0.241571
1705	-0.459875	-1.35335	0.433596
1706	0.179373	-0.713753	1.0725
1707	0.182747	-0.715766	1.08126
1708	0.517845	-0.380668	1.41636
1709	-0.880977	-1.77949	0.0175366
1710	-0.652581	-1.55109	0.245932
1711	-0.590535	-1.48306	0.301993
1712	-1.01011	-1.90709	-0.113132
1713	0.184081	-0.712897	1.08106
1714	-0.0335503	-0.930528	0.863428
1715	1.38207	0.48509	2.27905
1716	-0.153853	-1.05083	0.743125
1717	0.139207	-0.757771	1.03619
1718	0.718085	-0.178893	1.61506
1719	-0.920904	-1.81788	-0.0239259
1720	0.250266	-0.646712	1.14724
1721	-0.247575	-1.14455	0.649403
1722	0.707269	-0.188092	1.60263
1723	-0.0944709	-0.989831	0.800889
1724	-0.143675	-1.03903	0.751686
1725	1.23562	0.340262	2.13098
1726	-1.91168	-2.80704	-1.01632
1727	-0.896095	-1.79146	-0.000734713
1728	-0.565985	-1.46135	0.329375
1729	-0.0929284	-0.988289	0.802432
1730	0.162908	-0.732452	1.05827
1731	0.679173	-0.216187	1.57453
1732	1.44419	0.548838	2.33955
1733	0.479378	-0.415978	1.37473
1734	1.26947	0.374112	2.16482
1735	1.33757	0.442217	2.23293
1736	0.305441	-0.589915	1.2008
1737	0.221555	-0.673802	1.11691
1738	1.01184	0.116482	1.90719
1739	-0.365446	-1.25262	0.521723
1740	-1.30148	-2.18864	-0.414306
1741	-0.874477	-1.76165	0.0126923
1742	0.520516	-0.366653	1.40769
1743	-0.0297652	-0.916934	0.857404
1744	0.523724	-0.363445	1.41089
1745	1.04531	0.158136	1.93247
1746	-0.182873	-1.07004	0.704297
1747	-0.783859	-1.67103	0.10331
1748	-0.983962	-1.87113	-0.0967926
1749	-0.766669	-1.65384	0.1205
1750	0.696503	-0.190667	1.58367
1751	0.578712	-0.308969	1.46639
1752	1.52412	0.63644	2.4118
1753	1.97516	1.08748	2.86284
1754	1.72903	0.84135	2.61671
1755	1.96276	1.07508	2.85044
1756	1.39254	0.505409	2.27968
1757	0.758295	-0.128598	1.64519
1758	-0.588071	-1.47496	0.298822
1759	0.925323	0.03843	1.81222
1760	-0.651701	-1.53859	0.235192
1761	0.265125	-0.621768	1.15202
1762	-0.435835	-1.32273	0.451059
1763	0.0971918	-0.789701	0.984085
1764	0.463236	-0.423658	1.35013
1765	0.0681323	-0.818761	0.955026
1766	0.988088	0.101195	1.87498
1767	0.90588	0.0203847	1.79137
1768	-0.245177	-1.13067	0.640317
1769	0.165842	-0.719653	1.05134
1770	-0.20271	-1.0882	0.682785
1771	-2.15071	-3.0362	-1.26521
1772	-0.0662198	-0.951715	0.819275
1773	-0.14372	-1.02921	0.741775
1774	-0.965931	-1.85143	-0.0804362
1775	-1.08262	-1.96812	-0.197128
1776	0.417937	-0.467557	1.30343
1777	0.566374	-0.319121	1.45187
1778	0.815567	-0.069928	1.70106
1779	1.455	0.569501	2.34049
1780	-0.119098	-1.00459	0.766397
1781	-1.97306	-2.85856	-1.08757
1782	-0.692294	-1.57779	0.193201
1783	-1.80003	-2.68553	-0.914538
1784	-0.775116	-1.66061	0.110379
1785	-0.894356	-1.77985	-0.00886106
1786	-1.7771	-2.66259	-0.891602
1787	-0.851922	-1.73742	0.0335727
1788	-2.21127	-3.09677	-1.32578
1789	-1.33784	-2.22334	-0.45235
1790	-1.80217	-2.68767	-0.916677
1791	-0.311163	-1.19666	0.574332
1792	-0.337684	-1.22318	0.547811
1793	0.334813	-0.550681	1.22031
1794	1.03666	0.15117	1.92216
1795	-0.274354	-1.15985	0.61114
1796	-0.0913891	-0.976884	0.794106
1797	0.507096	-0.378398	1.39259
1798	-1.26094	-2.14643	-0.375445
1799	0.11996	-0.765535	1.00545
1800	-0.400742	-1.28624	0.484753
1801	-1.38706	-2.27255	-0.501565
1802	-0.611925	-1.49742	0.27357
1803	-1.18024	-2.06573	-0.294741
1804	-0.266194	-1.15169	0.619301
1805	0.391635	-0.49444	1.27771
1806	-0.667981	-1.55406	0.218094
1807	-0.99855	-1.88463	-0.112475
1808	-1.19493	-2.07214	-0.317715
1809	-0.491207	-1.36842	0.386004
1810	-0.813179	-1.69039	0.0640322
1811	-1.40357	-2.28078	-0.526358
1812	-1.21482	-2.09203	-0.337612
1813	-0.522592	-1.3998	0.354619
1814	-0.648846	-1.52606	0.228365
1815	0.0325581	-0.844653	0.909769
1816	-1.10184	-1.97905	-0.224632
1817	0.859576	-0.0176347	1.73679
1818	-1.46712	-2.34433	-0.589911
1819	-1.74039	-2.6176	-0.86318
1820	-0.849746	-1.72696	0.0274652
1821	-0.732916	-1.61013	0.144294
1822	-1.99451	-2.87172	-1.1173
1823	-1.25872	-2.13593	-0.381504
1824	-1.38851	-2.26573	-0.511304
1825	-0.75608	-1.63329	0.12113
1826	-2.17785	-3.05506	-1.30064
1827	-1.33849	-2.2157	-0.461275
1828	-0.697921	-1.57513	0.17929
1829	-2.17741	-3.05462	-1.3002
1830	-0.345047	-1.22226	0.532164
1831	-0.410675	-1.28789	0.466536
1832	0.00360811	-0.873603	0.880819
1833	-0.528554	-1.40576	0.348657
1834	0.830379	-0.0468314	1.70759
1835	0.159	-0.718211	1.03621
1836	-0.293061	-1.17027	0.584149
1837	-0.278914	-1.15612	0.598297
1838	-1.48849	-2.3657	-0.611282
1839	-0.676361	-1.55357	0.20085
1840	-0.00407681	-0.881288	0.873134
1841	-0.368318	-1.24553	0.508893
1842	-0.404025	-1.28124	0.473185
1843	-1.23091	-2.10812	-0.353697
1844	-0.0812001	-0.958411	0.796011
1845	-1.42456	-2.30226	-0.546854
1846	-0.962719	-1.84042	-0.0850168
1847	-1.55171	-2.42941	-0.674004
1848	-0.46777	-1.34547	0.409933
1849	-0.523253	-1.40096	0.35445
1850	-0.895646	-1.77335	-0.0179433
1851	0.0610929	-0.81661	0.938796
1852	-1.01699	-1.89469	-0.139289
1853	-2.85068	-3.72839	-1.97298
1854	-0.959777	-1.83748	-0.0820744
1855	-0.948082	-1.82579	-0.0703797
1856	-0.263994	-1.1417	0.613708
1857	-0.705326	-1.58303	0.172376
1858	-0.656342	-1.53405	0.22136
1859	-1.53635	-2.41405	-0.658645
1860	0.32729	-0.550412	1.20499
1861	-1.27347	-2.15118	-0.395772
1862	0.0586841	-0.819019	0.936387
1863	-0.363779	-1.24148	0.513923
1864	-0.107135	-0.984838	0.770568
1865	0.152659	-0.725043	1.03036
1866	1.01648	0.138773	1.89418
1867	0.529133	-0.34857	1.40684
1868	-0.871447	-1.74915	0.00625534
1869	-0.0582916	-0.935994	0.819411
1870	-0.0835729	-0.961276	0.79413
1871	-0.088921	-0.966624	0.788782
1872	0.0248552	-0.852848	0.902558
1873	-0.736825	-1.61453	0.140878
1874	-1.69635	-2.57405	-0.818644
1875	-0.491595	-1.3693	0.386108
1876	-1.02819	-1.90589	-0.150483
1877	-0.599902	-1.4776	0.277801
1878	0.0279284	-0.849774	0.905631
1879	-0.930386	-1.80809	-0.0526837
1880	-0.693593	-1.5713	0.18411
1881	-1.28022	-2.15792	-0.402514
1882	0.539186	-0.338516	1.41689
1883	-1.13665	-2.01435	-0.258947
1884	0.720453	-0.157249	1.59816
1885	0.00761496	-0.870088	0.885318
1886	0.281738	-0.595965	1.15944
1887	-0.895698	-1.7734	-0.0179954
1888	-1.33385	-2.21155	-0.456142
1889	-1.73739	-2.6151	-0.85969
1890	0.0270578	-0.850645	0.90476
1891	-0.719199	-1.5969	0.158503
1892	0.594841	-0.282862	1.47254
1893	-0.30001	-1.17771	0.577693
1894	1.57676	0.69906	2.45447
1895	-0.644666	-1.52237	0.233037
1896	-0.349873	-1.22758	0.527829
1897	0.497078	-0.380625	1.37478
1898	1.14935	0.271646	2.02705
1899	0.0223281	-0.855375	0.900031
1900	0.22052	-0.657183	1.09822
1901	-0.455047	-1.33275	0.422656
1902	-1.00648	-1.88418	-0.128773
1903	-0.0772101	-0.954913	0.800493
1904	-0.52937	-1.40707	0.348333
1905	-1.07375	-1.95145	-0.196045
1906	-0.320446	-1.19815	0.557256
1907	0.86265	-0.0150529	1.74035
1908	0.518836	-0.358867	1.39654
1909	0.614613	-0.263089	1.49232
1910	1.05542	0.17772	1.93312
1911	-0.94457	-1.82227	-0.066867
1912	0.480212	-0.397491	1.35791
1913	-0.415647	-1.29335	0.462056
1914	-0.73143	-1.60913	0.146273
1915	-0.263632	-1.14133	0.614071
1916	0.0916179	-0.786085	0.969321
1917	-1.8978	-2.7755	-1.02009
1918	-1.30488	-2.18259	-0.42718
1919	-0.530772	-1.40847	0.346931
1920	0.134783	-0.742919	1.01249
1921	0.105069	-0.772633	0.982772
1922	0.848419	-0.0292841	1.72612
1923	1.65711	0.77941	2.53482
1924	2.08885	1.21115	2.96656
1925	1.74846	0.870757	2.62616
1926	1.25402	0.376319	2.13172
1927	2.0098	1.1321	2.8875
1928	1.19402	0.31632	2.07173
1929	1.51272	0.63502	2.39042
1930	1.01451	0.136808	1.89221
1931	0.442953	-0.43475	1.32066
1932	1.52153	0.643827	2.39923
1933	-0.145364	-1.02307	0.732339
1934	0.190968	-0.686735	1.06867
1935	0.545694	-0.332008	1.4234
1936	0.302167	-0.575535	1.17987
1937	0.266411	-0.611291	1.14411
1938	0.415215	-0.462487	1.29292
1939	-0.192262	-1.06996	0.685441
1940	-2.37407	-3.25178	-1.49637
1941	-1.23488	-2.11259	-0.35718
1942	0.0739407	-0.803762	0.951643
1943	-0.652267	-1.52997	0.225435
1944	0.155722	-0.72198	1.03342
1945	1.58752	0.709816	2.46522
1946	1.95428	1.07658	2.83198
1947	0.0920041	-0.785699	0.969707
1948	0.547751	-0.329952	1.42545
1949	0.400549	-0.477154	1.27825
1950	0.252476	-0.625227	1.13018
1951	0.16882	-0.708882	1.04652
1952	0.717917	-0.159786	1.59562
1953	2.18284	1.30513	3.06054
1954	1.06149	0.183789	1.93919
1955	-0.426764	-1.30447	0.450939
1956	0.137804	-0.739899	1.01551
1957	2.12183	1.24413	2.99953
1958	1.63905	0.761344	2.51675
1959	-0.84976	-1.72746	0.0279424
1960	-0.512064	-1.38977	0.365639
1961	0.231536	-0.646167	1.10924
1962	0.315301	-0.562402	1.193
1963	0.549964	-0.327739	1.42767
1964	0.909685	0.0319822	1.78739
1965	0.79707	-0.0806327	1.67477
1966	-0.332226	-1.20993	0.545477
1967	0.949833	0.0721306	1.82754
1968	0.13493	-0.742772	1.01263
1969	-1.42566	-2.30336	-0.547956
1970	-1.16834	-2.04605	-0.29064
1971	-0.670998	-1.5487	0.206705
1972	0.452168	-0.425535	1.32987
1973	0.30543	-0.572273	1.18313
1974	-0.639366	-1.51707	0.238336
1975	-0.395941	-1.27364	0.481762
1976	-0.249196	-1.1269	0.628506
1977	-0.0854548	-0.963158	0.792248
1978	-0.263503	-1.14121	0.6142
1979	0.59717	-0.280533	1.47487
1980	1.34959	0.471892	2.2273
1981	1.61131	0.73361	2.48901
1982	0.536239	-0.341463	1.41394
1983	1.09977	0.222069	1.97747
1984	1.38857	0.510867	2.26627
1985	0.708976	-0.168727	1.58668
1986	0.416688	-0.461015	1.29439
1987	1.65014	0.772441	2.52785
1988	1.06953	0.191825	1.94723
1989	0.524958	-0.352745	1.40266
1990	0.691839	-0.185863	1.56954
1991	1.92569	1.04799	2.8034
1992	-0.191505	-1.06921	0.686197
1993	0.05053	-0.827173	0.928233
1994	0.155013	-0.72269	1.03272
1995	0.95844	0.080737	1.83614
