# Supplementary material for: Hydroclimate variability in Scandinavia over the last millennium – insights from a climate model–proxy data comparison
Source: Copernicus journal article supplement (doi:10.5194/cp-13-1831-2017), 2017-12-18
Supplement: Supplementary file [file cp-13-1831-2017-supplement-title-page.pdf › cp-13-1831-2017-supplement-title-page.pdf]

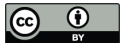

## *Supplement of*

# **Hydroclimate variability in Scandinavia over the last millennium – insights from a climate model–proxy data comparison**

**Kristina Seftigen et al.**

*Correspondence to:* Kristina Seftigen ([kristina.seftigen@gvc.gu.se](mailto:kristina.seftigen@gvc.gu.se))

- [cp-13-1831-2017-supplement-title-page.pdf](#)
- [RCSsigFree\\_TRWcrns.xlsx](#)
- [ScandH17reconstruction.xlsx](#)
- [Supplement.docx](#)

The copyright of individual parts of the supplement might differ from the CC BY 3.0 License.
